# Supplementary material
Source: PubMed Central journal article supplement (PMC5224530)
Supplement: NIHMS800389-supplement-Supporting_Information.pdf [file NIHMS800389-supplement-Supporting_Information.pdf]

| <b>Table of contents</b>                                                                                                                                   | Pages   |
|------------------------------------------------------------------------------------------------------------------------------------------------------------|---------|
| Natural Product Characterization General Experimental Procedures                                                                                           | S2      |
| Biological Material Collection and Identification                                                                                                          | S2      |
| Extraction and Isolation                                                                                                                                   | S2-S3   |
| Figure S1. Comparison of $^1\text{H}$ spectrum of the natural cocosolide ( <b>1</b> ) from Cocos Lagoon and Tanguisson reef flat                           | S4      |
| Figure S2. Comparison of $^{13}\text{C}$ NMR spectrum of the natural cocosolide ( <b>1</b> ) from Cocos Lagoon and Tanguisson reef flat                    | S5      |
| $^1\text{H}$ , $^{13}\text{C}$ , COSY, edited HSQC, HMBC and NOESY NMR spectra of cocosolide ( <b>1</b> )                                                  | S6-S11  |
| Base Hydrolysis of Cocosolide ( <b>1</b> )                                                                                                                 | S12     |
| Methylation of Cocosolide Seco-acid ( <b>2</b> )                                                                                                           | S12     |
| Preparation of ( <i>R</i> )-MTPA and ( <i>S</i> )-MTPA                                                                                                     | S12     |
| Single-crystal X-ray Structure Determination                                                                                                               | S13     |
| X-Ray Crystallographic Data, Table S1-S5                                                                                                                   | S14-S32 |
| Experimental procedures for all synthetic compounds                                                                                                        | S32-S48 |
| Figure S3. Comparison of $^1\text{H}$ spectrum of the natural cocosolide ( <b>1</b> ) (from Cocos Lagoon) and the synthetic cocosolide ( <b>1</b> )        | S49     |
| Figure S4. Comparison of $^{13}\text{C}$ NMR spectrum of the natural cocosolide ( <b>1</b> ) (from Cocos Lagoon) and the synthetic cocosolide ( <b>1</b> ) | S50     |
| $^1\text{H}$ and $^{13}\text{C}$ NMR spectra of all synthetic compounds                                                                                    | S51-S96 |
| Supplementary References                                                                                                                                   | S97     |

**Natural Product Characterization General Experimental Procedures.** The melting point measured using a Gallenkamp melting point apparatus is uncorrected. The optical rotations were recorded on a Perkin Elmer model 343 polarimeter. UV spectrophotometric data was acquired on a Hitachi U-3010 spectrophotometer. IR spectroscopic data were obtained on a Perkin Elmer Spectrum 100 FT-IR spectrometer. NMR data (of cocosolide collected from Cocos Lagoon) were collected on a JEOL ECA-600 spectrometer operating at 600 MHz for  $^1\text{H}$  and 150 MHz for  $^{13}\text{C}$ . The edited-HSQC experiment was optimized for  $^1J_{\text{CH}} = 140$  Hz and the HMBC spectrum was optimized for  $^{2,3}J_{\text{CH}} = 8$  Hz.  $^1\text{H}$  NMR chemical shifts (referenced to residual  $\text{CH}_3\text{CN}$  observed at  $\delta$  1.93) were assigned using a combination of data from 2D DQF COSY and multiplicity-edited HSQC experiments. Similarly,  $^{13}\text{C}$  NMR chemical shifts (referenced to  $\text{CD}_3\text{CN}$  observed at  $\delta$  118.2) were assigned on the basis of multiplicity-edited HSQC experiments. NMR data (of cocosolide collected from Tanguisson reef flat) were collected on a Varian Mercury-Plus-400 spectrometer operating at 400 MHz for  $^1\text{H}$  and 100 MHz for  $^{13}\text{C}$ . The HRMS data was obtained using an Agilent 6210 LC-TOF mass spectrometer equipped with an APCI/ESI multimode ion source detector at the Mass Spectrometer Facility at the University of California, Riverside, California. Silica gel 60 (EMD Chemicals, Inc. 230–400 mesh) and Varian BondElut octadecyl ( $\text{C}_{18}$ ) were used for column chromatography. All solvents used were of HPLC grade (Fisher Scientific).

**Biological Material Collection and Identification.** The initial sample of cyanobacterial soft golden puffballs of cyanobacterium *Symploca* sp. was collected in December 1999 from the reef near Cocos Island, Guam. The sample was identified by one of us (VJP) based on morphological characteristics of the genus and the voucher specimen (VP-ECO 22) is maintained at the Smithsonian Marine Station, Fort Pierce, FL. A recollection at the same location was carried out in October 2000.

The sample of *Symploca* sp. NIH 393 was collected in September 6, 2001 from 18 m depth from a Reef wall north of Pago, Guam. The sample was identified on morphological characteristics of the genus and the voucher specimen is maintained at the Smithsonian Marine Station, Fort Pierce, FL.

Another sample of golden mat-forming *Symploca* sp. VPG 14-1 was collected from Tanguisson reef flat, Guam, on May 27, 2014. Two samples of golden puffballs VPG14-35 and VPG14-47 were collected from Piti Bomb Holes, Guam on May 31, 2014 and from Finger Reef, Guam on June 3, 2014. The samples were identified on morphological characteristics of the genus and the voucher specimens are maintained at the Smithsonian Marine Station, Fort Pierce, FL.

**Extraction and Isolation.** The freeze dried material from the 1999 collection from Cocos Lagoon was extracted with a mixture of  $\text{CH}_2\text{Cl}_2$ –MeOH (1:1) and then with aqueous MeOH (1:1). The combined extract (9.34 g) was subsequently partitioned between *n*-BuOH and  $\text{H}_2\text{O}$ . Concentration of these extracts furnished 0.440 g of *n*-BuOH-soluble fraction and 8.8 g  $\text{H}_2\text{O}$ -soluble material. The *n*-BuOH-soluble fraction (0.440 g) was chromatographed on a column of  $\text{SiO}_2$  (20 g) using a hexanes–EtOAc step gradient system followed by an EtOAc–MeOH step gradient to give six sub-fractions. The sub-fraction 3 (30 mg), eluting with EtOAc was further chromatographed on a column of  $\text{SiO}_2$  (5 g) using a hexanes–EtOAc system to give two sub-fractions. The sub-fraction 2 (14 mg) was further purified by reversed-phase HPLC (semi-prep

10 × 250 mm, 5 μm, RP-18, flow 3.0 mL/min) using 10% H<sub>2</sub>O–MeOH to give 8.0 mg of cocosolide (**1**).

The recollection from Cocos Lagoon provided a lipophilic extract (6.5 g) that was subjected to same purification procedure to give 5.0 mg of cocosolide (**1**). Subsequent recollections of the same cyanobacterium furnished additional 10 mg of cocosolide (**1**).

The freeze dried material derived from *Symploca* sp. NIH 393 from Pago was extracted with a mixture of EtOAc–MeOH (1:1) and then with aqueous MeOH (1:1) to give 2.3 g and 4.6 g of extracts, respectively. The EtOAc–MeOH extract was partitioned between EtOAc and H<sub>2</sub>O to give 0.110 g of EtOAc-soluble fraction. This fraction was chromatographed on a column of SiO<sub>2</sub> (20 g) using a hexanes–EtOAc step gradient system followed by an EtOAc–MeOH- step gradient to give four sub-fractions. The sub-fraction 2 (0.011 g), eluting with EtOAc, was pushed through a C-18 SepPak using H<sub>2</sub>O–MeOH gradient followed by MeOH to give 4 sub-fractions. The first sub-fraction eluting with 15% H<sub>2</sub>O–MeOH was separated again using a C-18 SepPak with 20% H<sub>2</sub>O–MeOH and 15% H<sub>2</sub>O–MeOH, and the latter fraction furnished pure cocosolide (**1**) 2.2 mg.

For the Tanguisson reef flat collection VPG 14-1, the freeze-dried material (207.25 g) was extracted twice with EtOAc–MeOH (1:1) to yield the nonpolar extract (8.28 g). This was partitioned between hexanes and 20% aqueous MeOH. The latter was concentrated under reduced pressure and further partitioned between *n*-BuOH and H<sub>2</sub>O. The *n*-BuOH soluble fraction was concentrated to dryness (212.9 mg) and chromatographed on a column of Si gel eluting first with CH<sub>2</sub>Cl<sub>2</sub>, followed by increasing concentrations of *i*-PrOH; after 100% *i*-PrOH, increasing gradients of MeOH were used. The 6% *i*-PrOH fraction (29.1 mg) was subjected to a C<sub>18</sub> SPE eluting with 100% MeOH for sample pre-cleaning and the eluted sample was dried under N<sub>2</sub>. This was further purified by semipreparative reversed-phase HPLC (column, Phenomenex Synergi 4 μ Hydro-RP 80 Å, 250 × 10 mm, 4 μm; flow rate, 2.0 mL/min; UV detection at 200 nm and 220 nm) using a linear gradient of MeCN–H<sub>2</sub>O (50–100% MeCN in 30 min, 100% MeCN for 10 min, and then 100%–50% MeCN in 10 min) to yield semipure cocosolide (*t<sub>R</sub>* 28.1 min, 14.40 mg). The final purification of the semipure cocosolide was achieved by using the same chromatographic condition with a different linear gradient of MeCN–H<sub>2</sub>O (50–83% MeCN in 60 min, 100% MeCN for 10 min) to yield cocosolide (*t<sub>R</sub>* 51.3 min, 13.1 mg) as a colorless, amorphous solid.

The freeze dried samples 8.0 g of VPG14-35 and 1.2 g of VPG14-47 were extracted separately with a mixture of EtOAc–MeOH (1:1) and then with MeOH. The polar and the non-polar extracts from each sample were combined to give 135 mg and 64 mg of extracts, respectively. The <sup>1</sup>H NMR spectra of these extracts indicated the presence of the characteristic proton signals and the notable cyclopropyl signals present in cocosolide (**1**) and thus identified the presence of cocosolide in both collections.

$^1\text{H}$  NMR Spectrum of Natural Cocosolide (**1**) (from Cocos Lagoon) in  $\text{CD}_3\text{CN}$  (600 MHz)

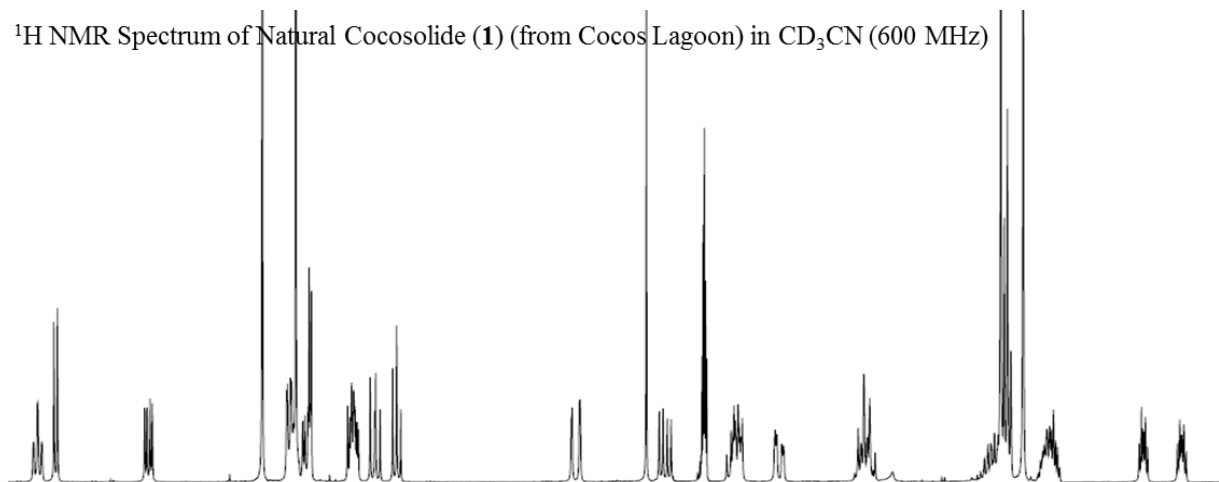

$^1\text{H}$  NMR Spectrum of Natural Cocosolide (**1**) (from Tanguisson reef flat) in  $\text{CD}_3\text{CN}$  (400 MHz)

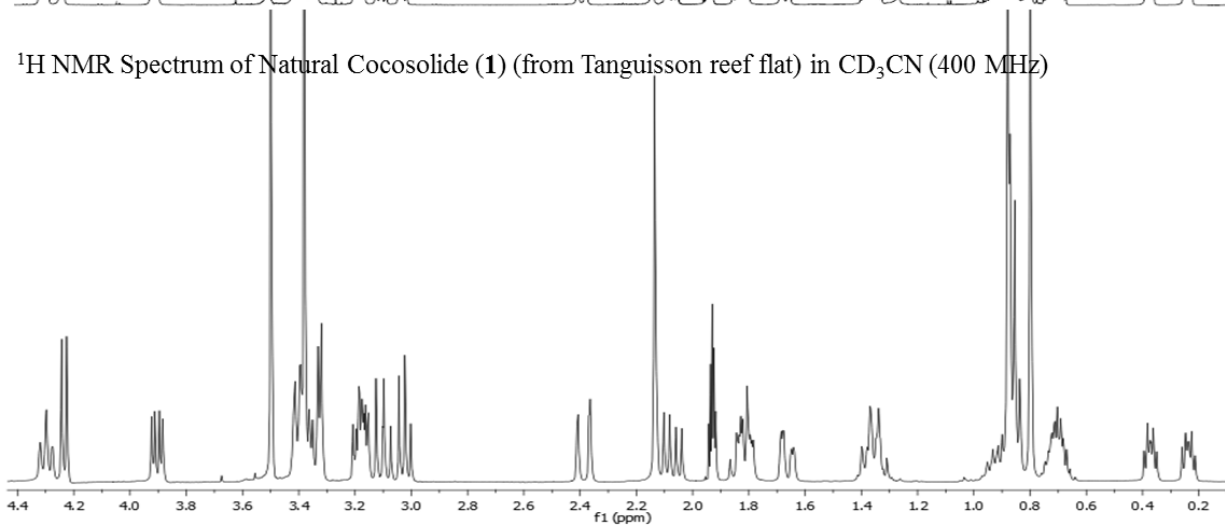

**Figure S1.** Comparison of  $^1\text{H}$  spectrum of natural cocosolide (**1**) from Cocos Lagoon and Tanguisson reef flat.

$^{13}\text{C}$  NMR Spectrum of Natural Cocosolide (**1**) (from Cocos Lagoon) in  $\text{CD}_3\text{CN}$  (150 MHz)

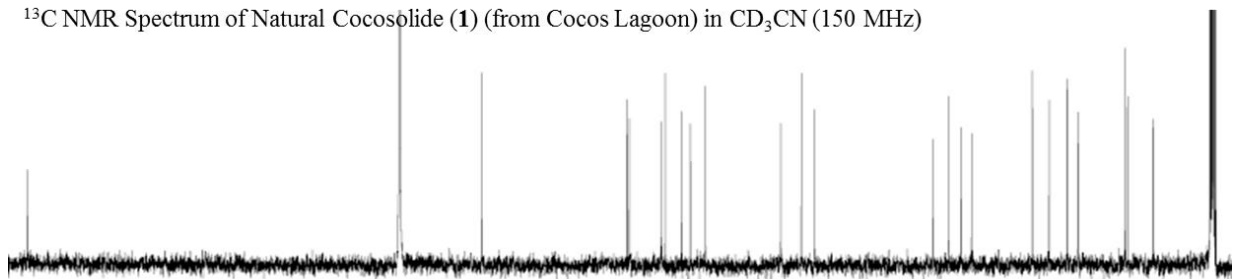

$^{13}\text{C}$  NMR Spectrum of Natural Cocosolide (**1**) (from Tanguisson reef flat) in  $\text{CD}_3\text{CN}$  (100 MHz)

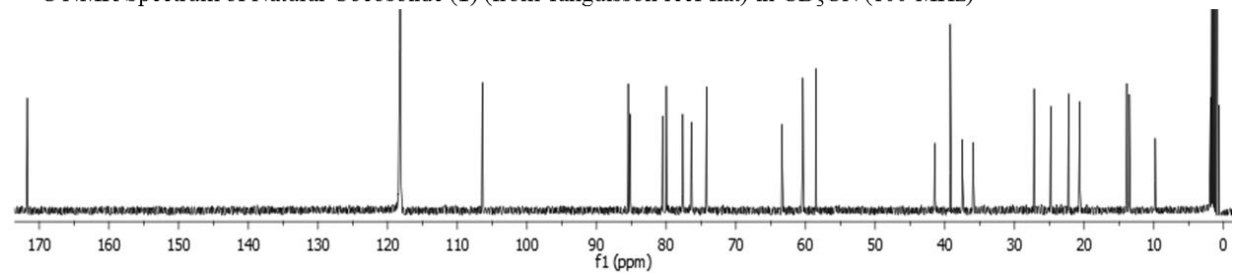

**Figure S2.** Comparison of  $^{13}\text{C}$  spectrum of natural cocosolide (**1**) from Cocos Lagoon and Tanguisson reef flat.

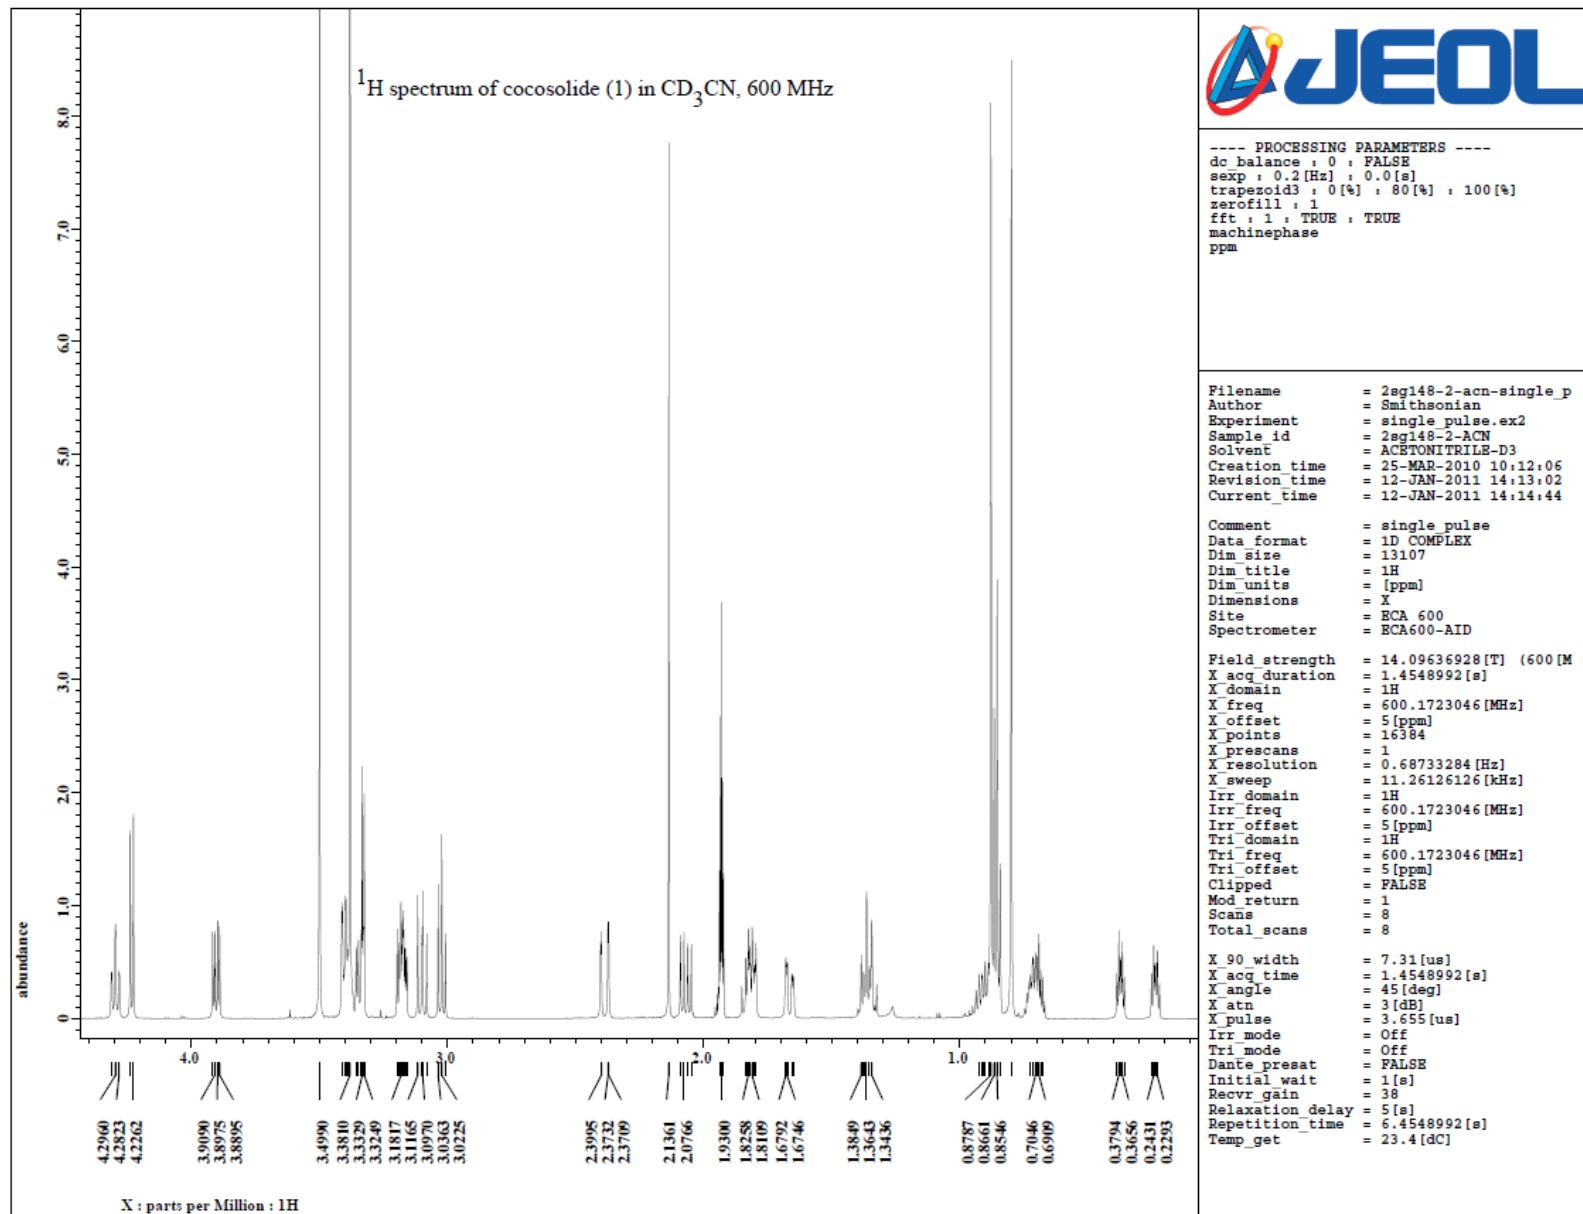

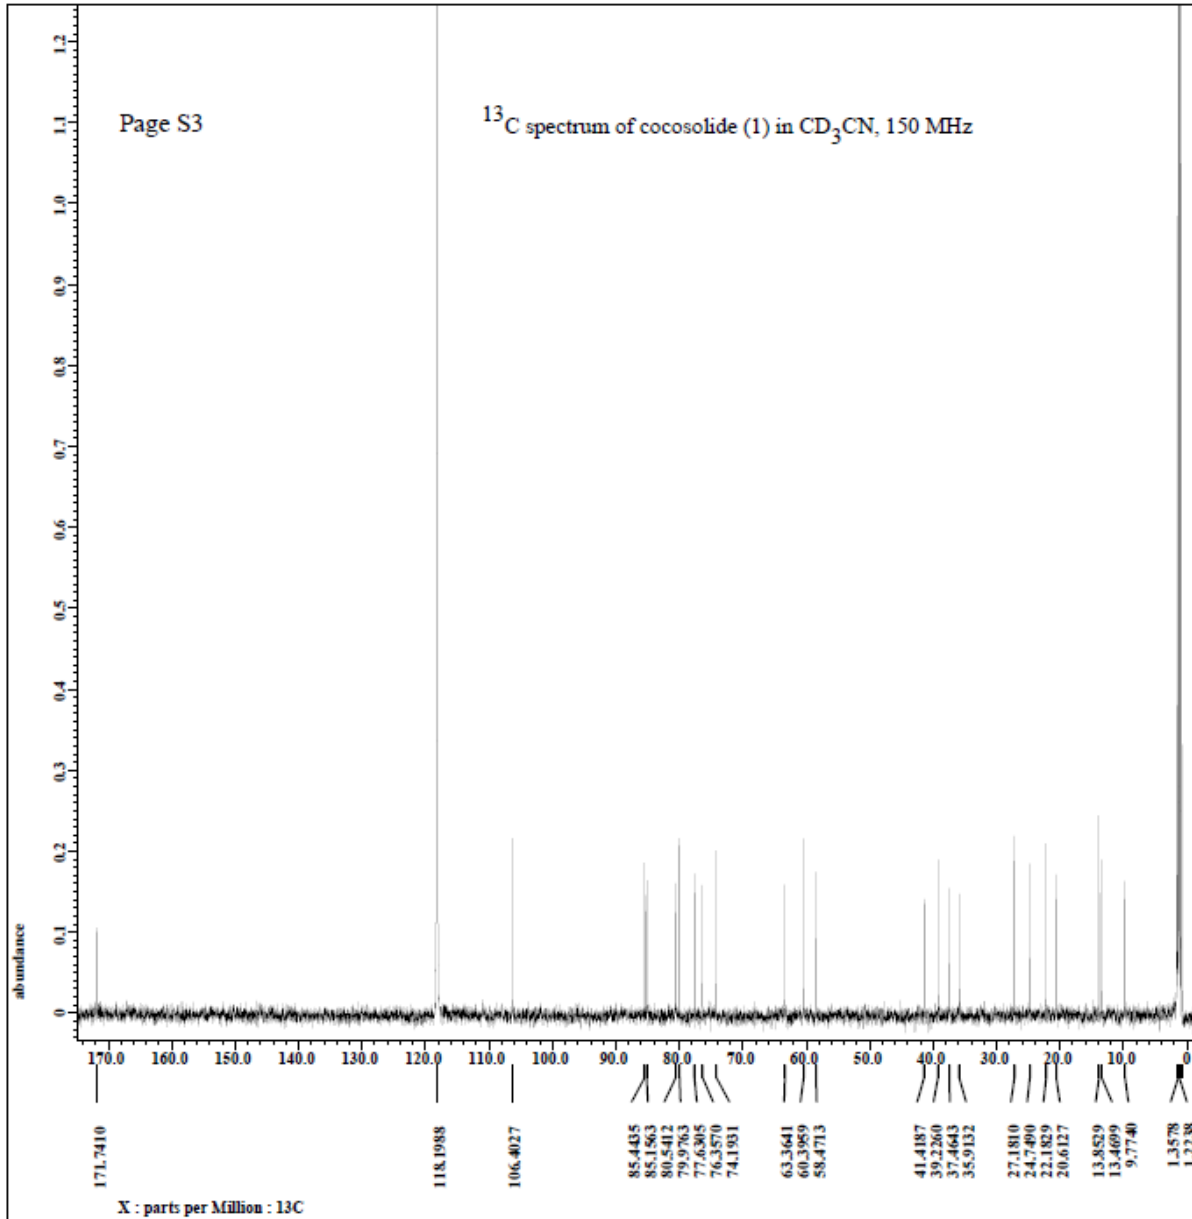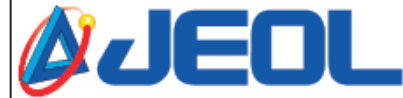

```

---- PROCESSING PARAMETERS ----
dc balance : 0 : FALSE
sexp : 2.0 [Hz] : 0.0 [e]
trapezoid3 : 0 [%] : 80 [%] : 100 [%]
zerofill : 1
fft : 1 : TRUE : TRUE
machinephase
ppm
  
```

```

Filename      - 2eg148-2-ACN-3-4-6-s1
Author       - Smithsonian
Experiment    - single pulse dec
Sample id     - 2eg148-2-ACN-3-4-6
Solvent      - ACETONITRILE-D3
Creation time - 25-MAR-2010 10:33:46
Revision time - 12-JAN-2011 14:23:11
Current time  - 12-JAN-2011 14:24:00
  
```

```

Comment      - single pulse decouple
Data format   - 1D COMPLEX
Dim size      - 26214
Dim title     - 13C
Dim units     - [ppm]
Dimensions    - X
Site          - BCA 600
Spectrometer  - BCA600-AID
  
```

```

Field strength - 14.09636928 [T] (600 [M]
X acq duration - 0.69206016 [s]
X domain       - 13C
X freq         - 150.91343039 [MHz]
X offset       - 100 [ppm]
X points       - 32768
X prescans     - 4
X resolution   - 1.44496109 [Hz]
X sweep        - 47.34848485 [kHz]
Irr domain     - 1H
Irr freq       - 600.1723046 [MHz]
Irr offset     - 5 [ppm]
Clipped        - FALSE
Mod return     - 1
Scans          - 251.0
Total scans    - 251.0
  
```

```

X 90 width    - 16 [us]
X acq time     - 0.69206016 [s]
X angle        - 30 [deg]
X atm          - 2 [dB]
X pulse        - 5.33333333 [us]
Irr_atn_dec    - 25 [dB]
Irr_atn_noe    - 25 [dB]
Irr_noise     - WALTZ
Decoupling     - TRUE
Initial wait   - 1 [s]
Noe            - TRUE
Noe time       - 2 [s]
Recvr_gain     - 60
Relaxation delay - 2 [s]
Repetition time - 2.69206016 [s]
Temp_get       - 23.6 [dc]
  
```

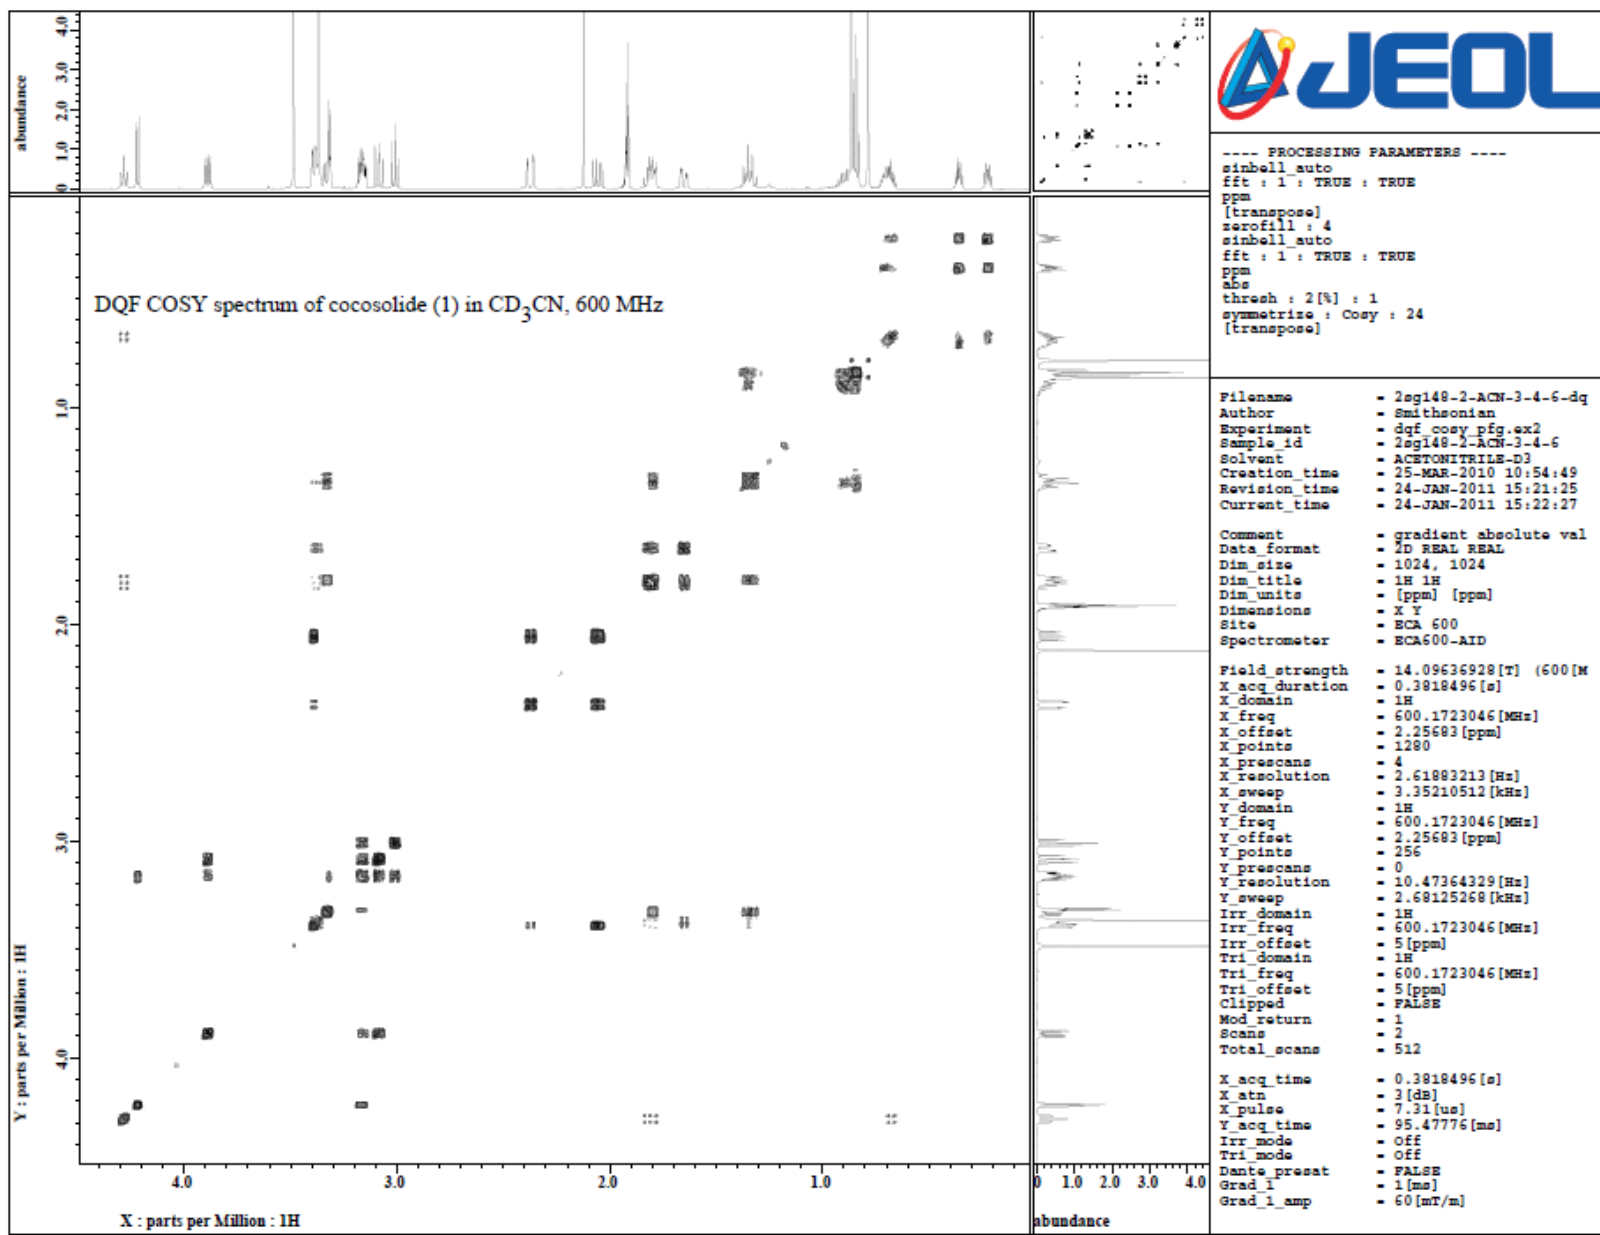



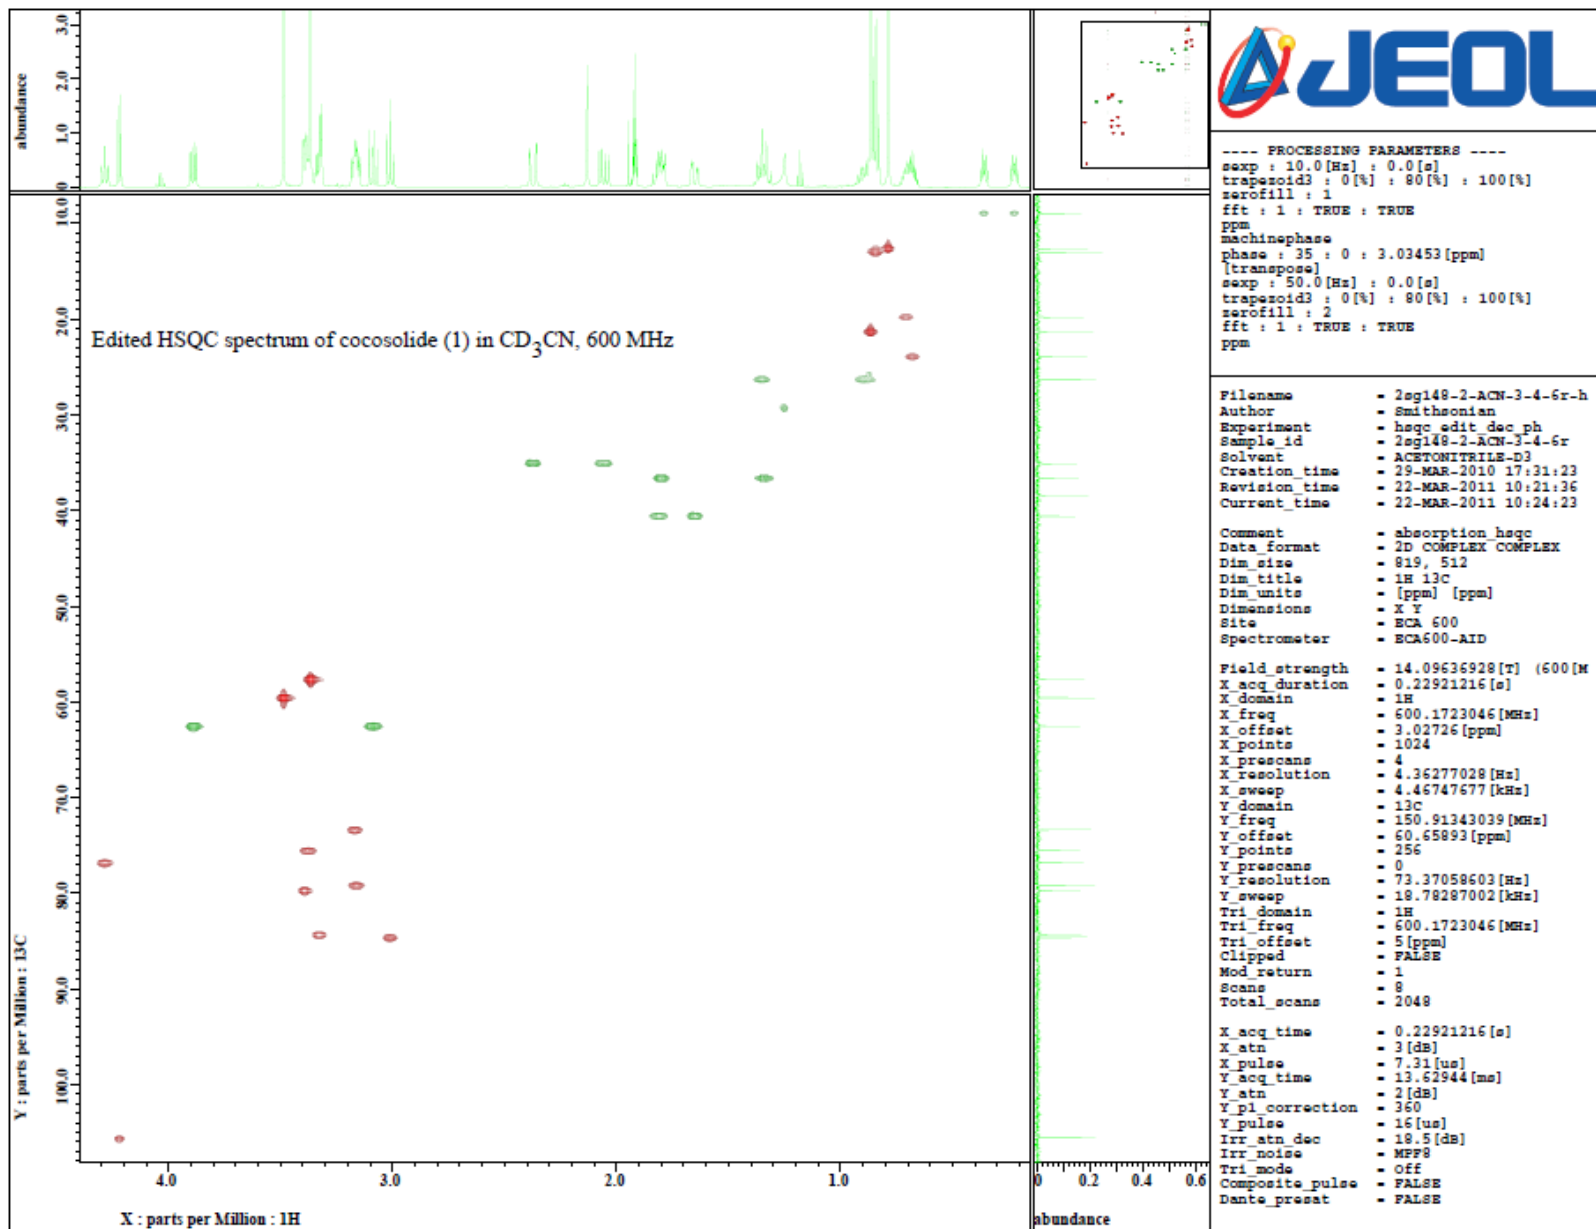

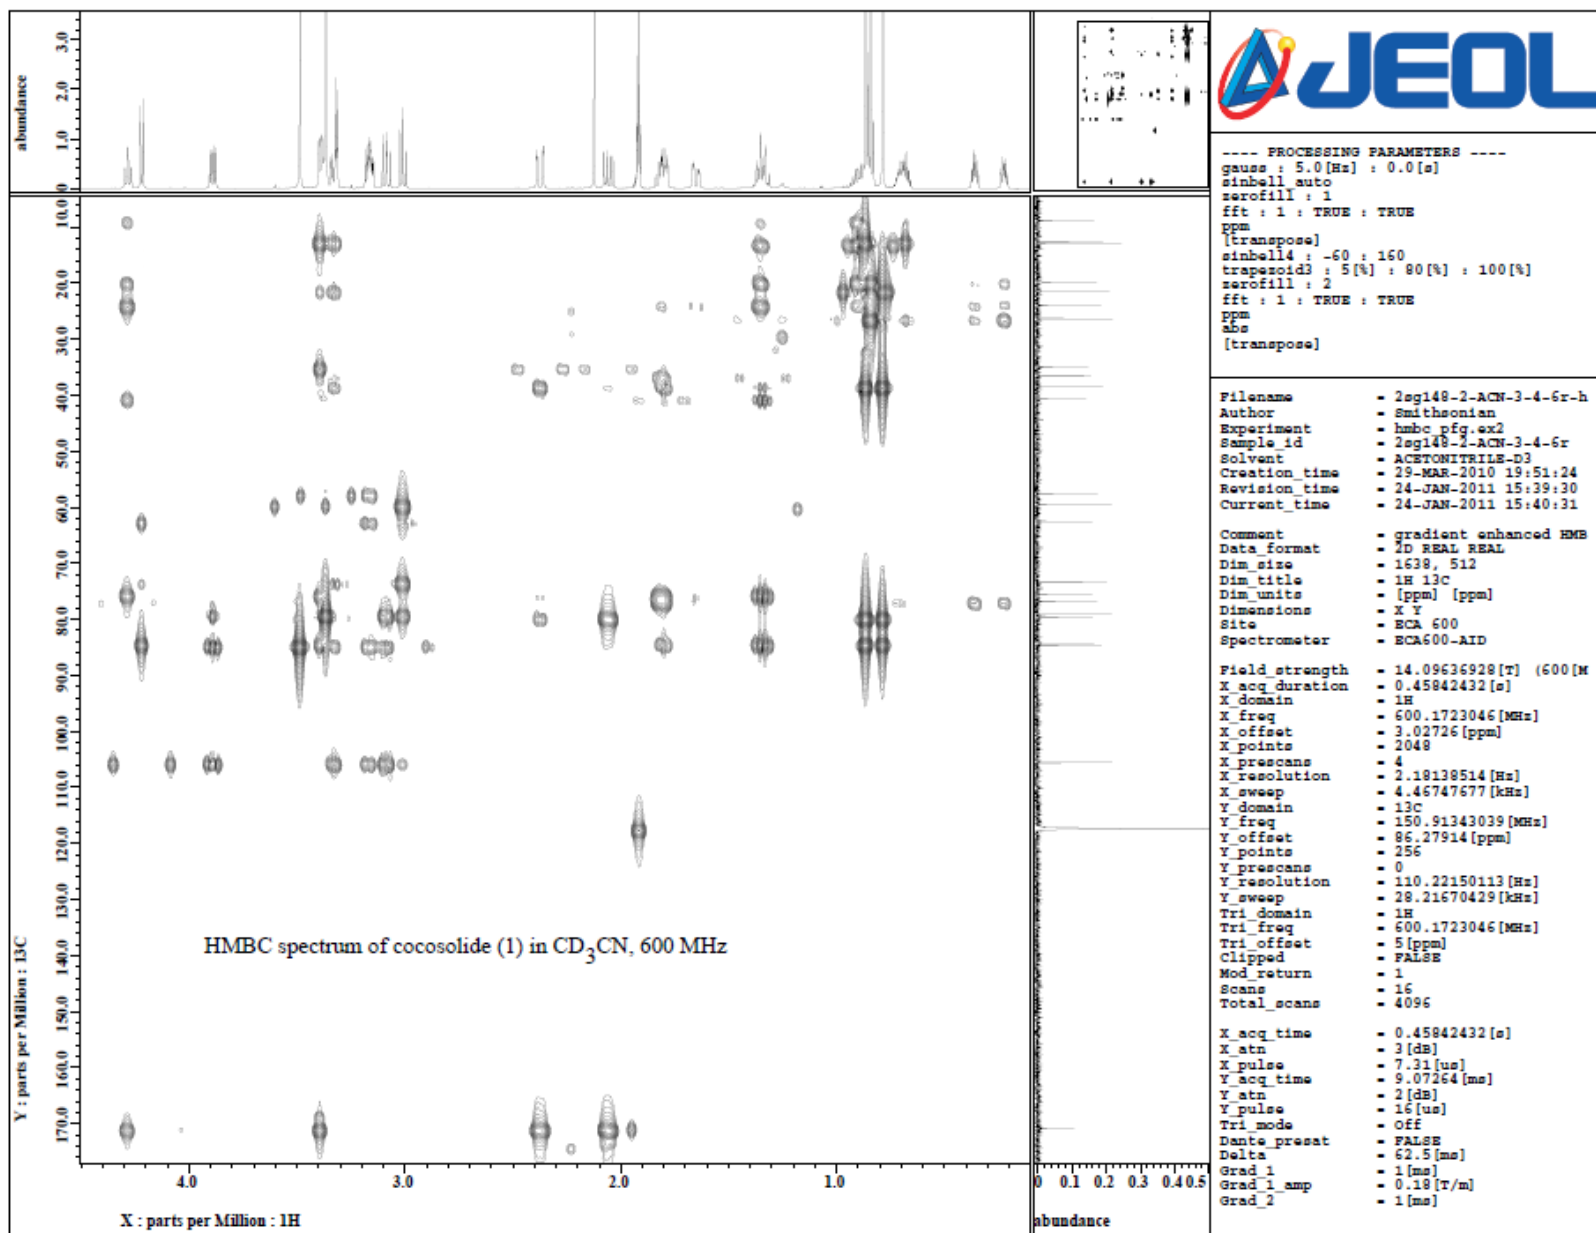

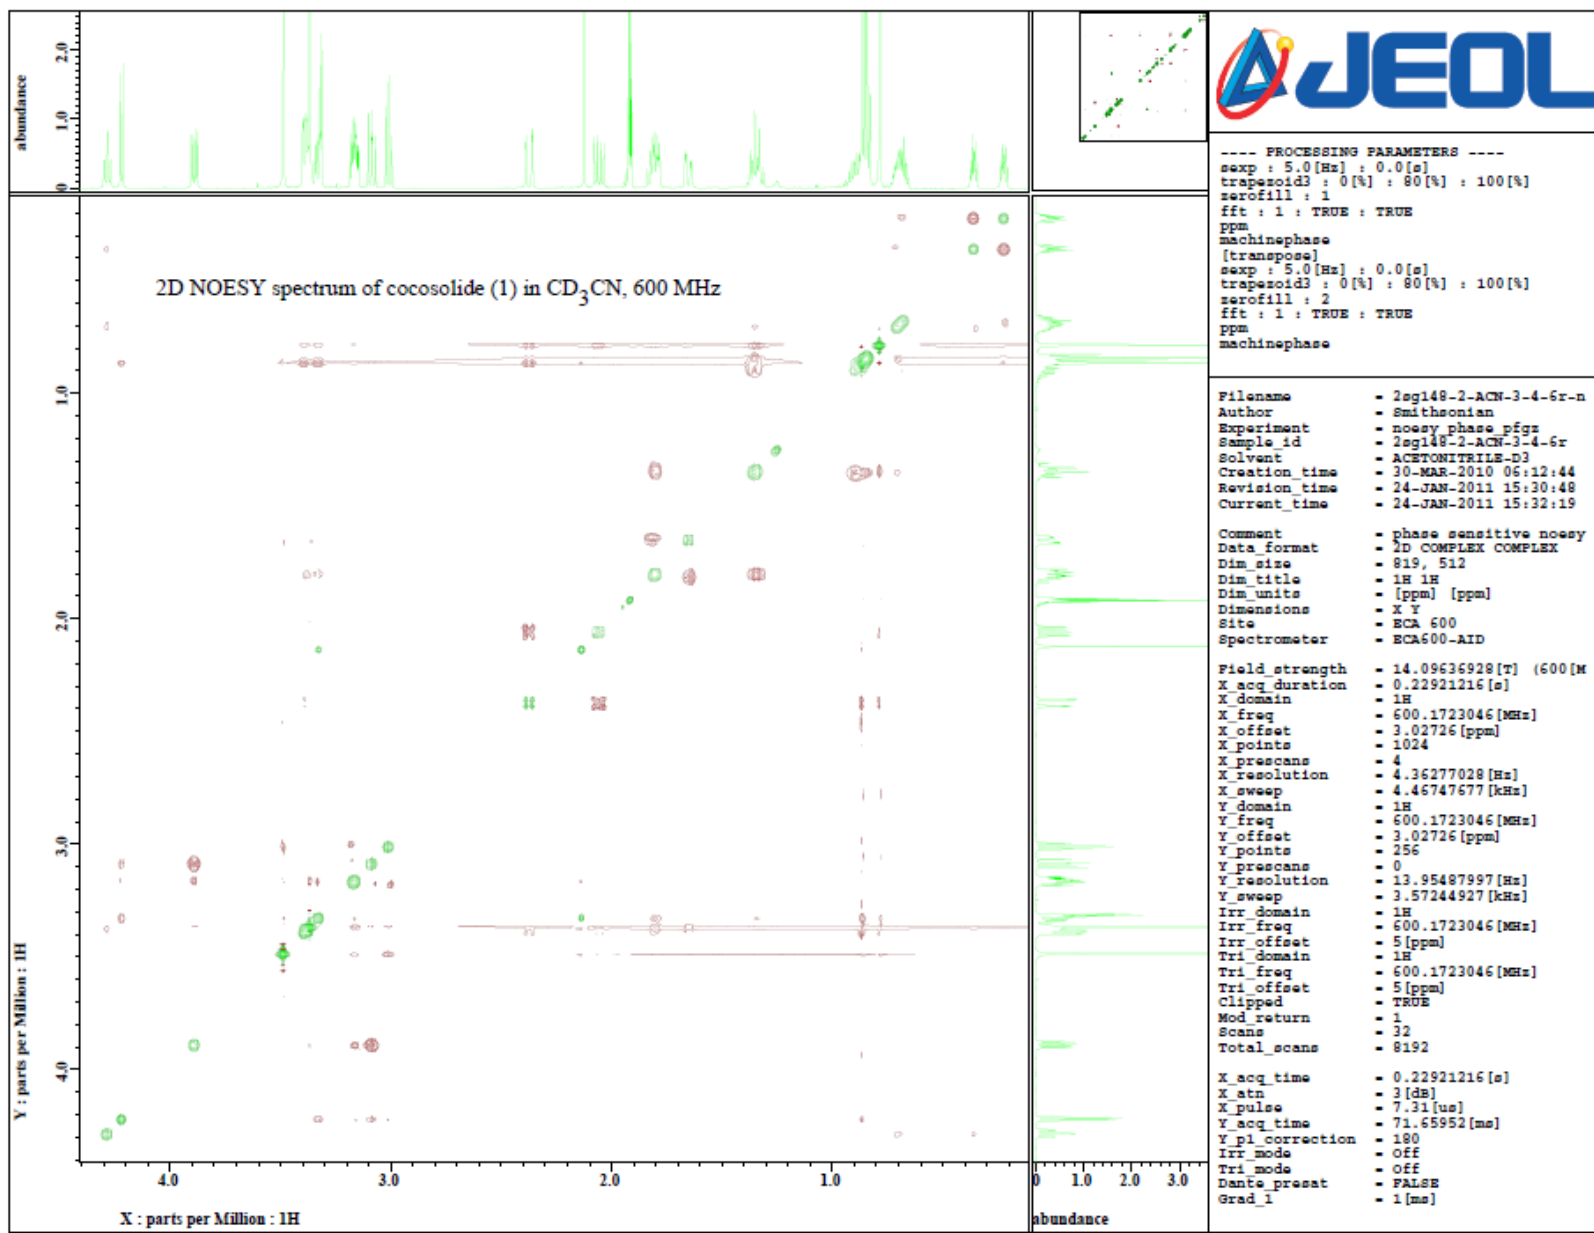

**Base Hydrolysis of Cocosolide (1):** Compound **1** (2.0 mg) was dissolved in 1.0 mL of EtOH and treated 0.1 mL of 10% aqueous NaOH solution. The mixture was stirred for 1 hour at 65 °C. The EtOH was evaporated and neutralized with dilute HCl at 5 °C. Extraction with CH<sub>2</sub>Cl<sub>2</sub> gave 2.0 mg of cocosolide seco-acid (**2**), isolated as white solid:  $[\alpha]^{25}_D -40.5$  (*c* 0.13, MeOH); IR (film)  $\nu_{\max}$  3464, 2959, 2932, 1718, 1389, 1259, 1164, 1096, 1076, 999, 955 cm<sup>-1</sup>; <sup>1</sup>H NMR (CD<sub>3</sub>CN)  $\delta$  4.69 (1H, br s OH-9), 4.23 (1H, d, *J* = 7.6 Hz, H-17), 3.90 (1H, dd, *J* = 11.0, 4.8 Hz, Ha-21), 3.56 (1H, m, H-7), 3.50 (3H, s, H-22), 3.45 (1H, dd, *J* = 8.2, 2.0 Hz, 3-H), 3.37 (3H, s, H-23), 3.35 (1H, dd, *J* = 11.4, 4.8 Hz, H-5), 3.18 (1H, m, H-20), 3.17 (1H, m, H-18), 3.10 (1H, dd, *J* = 11.0, 9.6 Hz, Hb-21), 3.02 (1H, t, *J* = 8.3 Hz, H-19), 2.99 (1H, m, H-9), 2.46 (1H, dd, *J* = 17.2, 2.0 Hz, H-2a), 2.27 (1H, dd, *J* = 17.2, 8.2 Hz, H-2b), 1.80 (1H, ddd, *J* = 13.0, 4.8, 2.0 Hz, H-6a), 1.65 (1H, m, H-8a), 1.57 (1H, m, H-8b), 1.43 (1H, ddd, *J* = 13.0, 11.4, 11.0 Hz, H-6b), 1.20 (2H, m, H-12), 0.93 (3H, s, H-15), 0.93 (3H, t, *J* = 6.9 Hz, H-13), 0.82 (3H, s, H-16), 0.60 (1H, m, H-11), 0.50 (1H, m, H-10), 0.32 (1H, m, H-14a), 0.16 (1H, m, H-14b); <sup>13</sup>C NMR (CD<sub>3</sub>CN, \* indicates these signals may be interchanged)  $\delta$  173.4 (C, C-1), 106.4 (CH, C-17), 85.5 (CH, C-19), 85.0 (CH, C-5), 81.2 (CH, C-3), 79.9 (CH, C-18), 76.1 (CH, C-7), 74.3\* (CH, C-20), 74.2\* (CH, C-9), 63.3 (CH<sub>2</sub>, C-21), 60.3 (CH<sub>3</sub>, C-22), 58.4 (CH<sub>3</sub>, C-23), 43.7 (CH<sub>2</sub>, C-8), 39.3 (C, C-4), 37.3 (CH<sub>2</sub>, C-6), 35.3 (CH<sub>2</sub>, C-2), 27.4 (CH<sub>2</sub>, C-12), 25.7 (CH, C-10), 22.2 (CH<sub>3</sub>, C-15), 19.0 (CH, C-11), 13.9 (CH<sub>3</sub>, C-13), 13.4 (CH<sub>3</sub>, C-16), 9.3 (CH<sub>2</sub>, C-14); HRESI/APCIMS *m/z* 483.2588 [M + Na]<sup>+</sup> (calcd for C<sub>23</sub>H<sub>40</sub>O<sub>9</sub>Na, 483.2565).

**Methylation of Cocosolide Seco-acid (2).** Compound **2** (1.0 mg) was dissolved in 1.0 mL of MeOH and cooled to 4 °C. The cooled solution was treated with 50  $\mu$ L of 2.0 M trimethylsilyl diazomethane in diethylether. Evaporation of MeOH and excess trimethylsilyl diazomethane gave 1.0 mg of cocosolide seco-ester (**3**), isolated as white, glassy solid:  $[\alpha]^{25}_D -42.8$  (*c* 0.17, MeOH); IR (film)  $\nu_{\max}$  3520, 2959, 1741, 1435, 1370, 1259, 1162, 1096, 1073, 991 cm<sup>-1</sup>; <sup>1</sup>H NMR (CD<sub>3</sub>CN)  $\delta$  4.23 (1H, d, *J* = 7.6 Hz, H-17), 3.90 (1H, dd, *J* = 11.0, 4.8 Hz, Ha-21), 3.59 (3H, s, H-24), 3.55 (1H, m, H-7), 3.50 (3H, s, H-22), 3.45 (1H, dd, *J* = 8.2, 2.0 Hz, 3-H), 3.37 (3H, s, H-23), 3.35 (1H, dd, *J* = 11.4, 4.8 Hz, H-5), 3.18 (1H, m, H-20), 3.17 (1H, m, H-18), 3.10 (1H, dd, *J* = 11.0, 9.6 Hz, Hb-21), 3.02 (1H, t, *J* = 8.3 Hz, H-19), 2.98 (1H, m, H-9), 2.87 (1H, d, *J* = 2.8 Hz, OH-9), 2.46 (1H, dd, *J* = 17.2, 2.0 Hz, H-2a), 2.27 (1H, dd, *J* = 17.2, 8.2 Hz, H-2b), 1.80 (1H, ddd, *J* = 13.0, 4.8, 2.0 Hz, H-6a), 1.63 (1H, m, H-8a), 1.55 (1H, m, H-8b), 1.43 (1H, ddd, *J* = 13.0, 11.4, 11.0 Hz, H-6b), 1.20 (2H, m, H-12), 0.93 (3H, s, H-15), 0.93 (3H, t, *J* = 6.9 Hz, H-13), 0.82 (3H, s, H-16), 0.58 (1H, m, H-11), 0.48 (1H, m, H-10), 0.30 (1H, m, H-14a), 0.16 (1H, m, H-14b); <sup>13</sup>C NMR (CD<sub>3</sub>CN, \* indicates these signals may be interchanged)  $\delta$  173.3 (C, C-1), 106.4 (CH, C-17), 85.4 (CH, C-19), 84.9 (CH, C-5), 81.4 (CH, C-3), 79.9 (CH, C-18), 75.9 (CH, C-7), 74.1\* (CH, C-20), 73.9\* (CH, C-9), 63.3 (CH<sub>2</sub>, C-21), 60.3 (CH<sub>3</sub>, C-22), 58.4 (CH<sub>3</sub>, C-23), 52.0 (CH<sub>3</sub>, C-24), 43.8 (CH<sub>2</sub>, C-8), 39.3 (C, C-4), 37.3 (CH<sub>2</sub>, C-6), 35.6 (CH<sub>2</sub>, C-2), 27.4 (CH<sub>2</sub>, C-12), 25.6 (CH, C-10), 22.2 (CH<sub>3</sub>, C-15), 18.9 (CH, C-11), 13.9 (CH<sub>3</sub>, C-13), 13.4 (CH<sub>3</sub>, C-16), 9.2 (CH<sub>2</sub>, C-14); HRESI/APCIMS *m/z* 497.2738 [M + Na]<sup>+</sup> (calcd for C<sub>24</sub>H<sub>42</sub>O<sub>9</sub>Na, 497.2721).

**Preparation of (R)-MTPA and (S)-MTPA Diesters of Seco-ester (3):** Compound **3** (0.3 mg) was dissolved in CHCl<sub>3</sub> (20  $\mu$ L) and added pyridine (60  $\mu$ L) and a catalytic amount of 4-DMAP. The solution was treated with *S*(-)-MTPA chloride (2.0  $\mu$ L) and stirred at room temperature for 24 hours. The reaction was terminated with the addition of MeOH (50  $\mu$ L) and the solvent was evaporated to give the (*R*)-MTPA diester of **3**. Similarly, the (*S*)-MTPA diester of **3** was prepared with *R*(-)-MTPA chloride using the same procedure. Both esters were subjected to HPLC (semi-

prep 250 × 10 mm, 5 μm, SiO<sub>2</sub>, flow 3.0 mL/min) using hexanes – 25% EtOAc to yield the pure (*R*)-MTPA diester of **3** (0.3 mg) and (*S*)-MTPA diesters of **3** (0.3 mg).

**R-MTPA ester of 3:** <sup>1</sup>H NMR (CD<sub>3</sub>CN) δ (only key resonances are listed) 1.912, 1.464 (2H, m, H-6), 3.567 (1H, m, H-7), 1.912, 1.807 (2H, m, H-8), 4.488 (H, m, H-9), 0.659 (H, m, H-10), 0.618 (H, m, H-11), 1.114, 1.023 (2H, m, H-12), 0.757 (3H, t, *J* = 6.9 Hz, H-13), 0.534, 0.348 (2H, m, H-14); HRESI/TOFMS *m/z* 929.3543 [M + Na]<sup>+</sup> (calcd for C<sub>44</sub>H<sub>56</sub>F<sub>6</sub>O<sub>13</sub>Na, 929.3517).

**S-MTPA ester of 3:** <sup>1</sup>H NMR (CD<sub>3</sub>CN) δ (only key resonances are listed) 1.717, 1.358 (2H, m, H-6), 3.289 (1H, m, H-7), 1.816, 1.740 (2H, m, H-8), 4.426 (H, m, H-9), 0.779 (H, m, H-10), 0.742 (H, m, H-11), 1.292, 1.116 (2H, m, H-12), 0.885 (3H, t, *J* = 6.9 Hz, H-13), 0.540, 0.370 (2H, m, H-14); HRESI/TOFMS *m/z* 929.3528 [M + Na]<sup>+</sup> (calcd for C<sub>44</sub>H<sub>56</sub>F<sub>6</sub>O<sub>13</sub>Na, 929.3517).

**Single-crystal X-ray Structure Determination:** A Leica MZ 75 microscope was used to identify a suitable colorless multi-faceted crystal with very well defined faces with dimensions (max, intermediate, and min) 0.3 mm × 0.2 mm × 0.1 mm from a representative sample of crystals of the same habit. The crystal mounted on a nylon loop was then placed in a cold nitrogen stream (Oxford) maintained at 110 K. An APEXII BRUKER X-ray (three-circle) diffractometer was employed for crystal screening, unit cell determination, and data collection. The goniometer was controlled using the APEX2 software suite.<sup>1</sup> The sample was optically centered with the aid of a video camera such that no translations were observed as the crystal was rotated through all positions. The detector was set at 6.0 cm from the crystal sample. The X-ray radiation employed was generated from a Mo sealed X-ray tube ( $K_{\alpha} = 0.70173 \text{ \AA}$  with a potential of 40 kV and a current of 40 mA) fitted with a graphite monochromator in the parallel mode (175 mm collimator with 0.5 mm pinholes). Sixty data frames were taken at widths of 0.5° with an exposure time of 60 s. These reflections were used in the auto-indexing procedure to determine the unit cell. A suitable cell was found and refined by nonlinear least squares and Bravais lattice procedures. The unit cell was verified by examination of the *h k l* overlays on several frames of data. No super-cell or erroneous reflections were observed. After careful examination of the unit cell, a standard data collection procedure was initiated using omega scans. Each frame was exposed for 60 s and contrasted against a 60 s dark current exposure. The measurements are reported in Table S1 of Supporting Information. Integrated intensity information for each reflection was obtained by reduction of the data frames with the program APEX2.<sup>1</sup> The integration method employed a three dimensional profiling algorithm and all data were corrected for Lorentz and polarization factors, as well as for crystal decay effects. Finally the data was merged and scaled to produce a suitable data set. The absorption correction program SADABS<sup>2</sup> was employed to correct the data for absorption effects. Systematic reflection conditions and statistical tests for the data suggested the space group *P2<sub>1</sub>*. A solution was obtained readily using SHELXTL (SHELXS).<sup>3</sup> All non-hydrogen atoms were refined with anisotropic thermal parameters. The hydrogen atoms bound to carbon were placed in idealized positions [C–H = 0.96 Å, U<sub>iso</sub>(H) = 1.2 × U<sub>iso</sub>(C)]. The structure was refined (weighted least squares refinement on *F*<sup>2</sup>) to convergence.<sup>3</sup> X-seed was employed for the final data presentation and structure plots.<sup>4</sup>

**Table S1. Crystal data and structure refinement for cocosolide (1)**

|                                   |                                                       |                  |
|-----------------------------------|-------------------------------------------------------|------------------|
| Identification code               | Cocosolide                                            |                  |
| Empirical formula                 | C <sub>46</sub> H <sub>76.25</sub> O <sub>16.12</sub> |                  |
| Formula weight                    | 887.32                                                |                  |
| Temperature                       | 110(2) K                                              |                  |
| Wavelength                        | 0.71073 Å                                             |                  |
| Crystal system                    | Monoclinic                                            |                  |
| Space group                       | P2(1)                                                 |                  |
| Unit cell dimensions              | a = 14.201(5) Å                                       | α = 90°.         |
|                                   | b = 18.976(7) Å                                       | β = 102.985(5)°. |
|                                   | c = 18.547(7) Å                                       | γ = 90°.         |
| Volume                            | 4870(3) Å <sup>3</sup>                                |                  |
| Z                                 | 4                                                     |                  |
| Density (calculated)              | 1.210 Mg/m <sup>3</sup>                               |                  |
| Absorption coefficient            | 0.090 mm <sup>-1</sup>                                |                  |
| F(000)                            | 1925                                                  |                  |
| Crystal size                      | 0.30 x 0.18 x 0.10 mm <sup>3</sup>                    |                  |
| Theta range for data collection   | 1.82 to 28.69°.                                       |                  |
| Index ranges                      | -19 ≤ h ≤ 18, -24 ≤ k ≤ 25, -24 ≤ l ≤ 24              |                  |
| Reflections collected             | 57028                                                 |                  |
| Independent reflections           | 22990 [R(int) = 0.0523]                               |                  |
| Completeness to theta = 28.69°    | 94.5 %                                                |                  |
| Absorption correction             | Semi-empirical from equivalents                       |                  |
| Max. and min. transmission        | 0.9910 and 0.9734                                     |                  |
| Refinement method                 | Full-matrix least-squares on F <sup>2</sup>           |                  |
| Data / restraints / parameters    | 22990 / 1 / 1148                                      |                  |
| Goodness-of-fit on F <sup>2</sup> | 1.006                                                 |                  |
| Final R indices [I > 2σ(I)]       | R1 = 0.0494, wR2 = 0.0861                             |                  |
| R indices (all data)              | R1 = 0.0884, wR2 = 0.1002                             |                  |
| Absolute structure parameter      | -0.2(4)                                               |                  |
| Largest diff. peak and hole       | 0.260 and -0.200 e.Å <sup>-3</sup>                    |                  |

**Table S2. Atomic coordinates ( $\times 10^4$ ) and equivalent isotropic displacement parameters ( $\text{\AA}^2 \times 10^3$ ) for cocosolide (1).  $U(\text{eq})$  is defined as one third of the trace of the orthogonalized  $U_{ij}$  tensor**

|        | x        | y       | z        | U(eq) |
|--------|----------|---------|----------|-------|
| O(1A)  | 2059(1)  | 3450(1) | 698(1)   | 28(1) |
| O(2A)  | 4461(1)  | 4084(1) | 1266(1)  | 38(1) |
| O(3A)  | 5072(1)  | 2987(1) | 1506(1)  | 27(1) |
| O(4A)  | 4599(1)  | 2851(1) | 3015(1)  | 28(1) |
| O(5A)  | 3102(1)  | 4156(1) | 2526(1)  | 37(1) |
| O(6A)  | 1741(1)  | 3506(1) | 2194(1)  | 26(1) |
| O(7A)  | 1005(1)  | 3633(1) | -1572(1) | 27(1) |
| O(8A)  | 1396(1)  | 3859(1) | -3005(1) | 35(1) |
| O(9A)  | -292(1)  | 4090(1) | -4104(1) | 40(1) |
| O(10A) | -1543(1) | 5122(1) | -3671(1) | 45(1) |
| O(11A) | -386(1)  | 4269(1) | -1909(1) | 30(1) |
| O(12A) | 5646(1)  | 2388(1) | 5250(1)  | 31(1) |
| O(13A) | 7209(1)  | 2017(1) | 5573(1)  | 34(1) |
| O(14A) | 5874(2)  | 3133(1) | 6580(1)  | 57(1) |
| O(15A) | 7432(1)  | 2635(1) | 7747(1)  | 48(1) |
| O(16A) | 9188(1)  | 2367(1) | 7151(1)  | 52(1) |
| C(1A)  | 2769(2)  | 3538(1) | 265(1)   | 25(1) |
| C(2A)  | 2346(2)  | 3369(1) | -559(1)  | 26(1) |
| C(3A)  | 1448(2)  | 3836(1) | -819(1)  | 26(1) |
| C(4A)  | 738(2)   | 3780(1) | -320(1)  | 28(1) |
| C(5A)  | 1268(2)  | 3925(1) | 476(1)   | 27(1) |
| C(6A)  | 3622(2)  | 3077(1) | 630(1)   | 27(1) |
| C(7A)  | 4406(2)  | 3458(1) | 1166(1)  | 26(1) |
| C(8A)  | 5936(2)  | 3260(1) | 2021(1)  | 27(1) |
| C(9A)  | 6135(2)  | 2777(1) | 2695(1)  | 29(1) |
| C(10A) | 5612(2)  | 2974(1) | 3294(1)  | 27(1) |
| C(11A) | 5956(2)  | 2569(1) | 4010(1)  | 30(1) |
| C(12A) | 5374(2)  | 2782(1) | 4567(1)  | 28(1) |
| C(13A) | 4280(2)  | 2697(1) | 4264(1)  | 29(1) |
| C(14A) | 4039(2)  | 3096(1) | 3519(1)  | 27(1) |
| C(15A) | 2997(2)  | 3026(1) | 3098(1)  | 28(1) |
| C(16A) | 2656(2)  | 3629(1) | 2577(1)  | 26(1) |
| C(17A) | 1207(2)  | 4108(1) | 1810(1)  | 30(1) |
| C(18A) | 658(2)   | 3864(1) | 1049(1)  | 31(1) |
| C(19A) | 3094(2)  | 3563(2) | -1003(1) | 36(1) |
| C(20A) | 2080(2)  | 2590(1) | -672(1)  | 35(1) |
| C(21A) | 557(2)   | 4170(1) | -2044(1) | 26(1) |
| C(22A) | 463(2)   | 3908(1) | -2836(1) | 28(1) |
| C(23A) | -133(2)  | 4408(1) | -3393(1) | 29(1) |
| C(24A) | -1086(2) | 4575(1) | -3193(1) | 32(1) |

|        |          |         |          |       |
|--------|----------|---------|----------|-------|
| C(25A) | -916(2)  | 4800(1) | -2385(1) | 34(1) |
| C(26A) | -96(2)   | 4534(2) | -4665(1) | 50(1) |
| C(27A) | -2551(2) | 5202(2) | -3678(2) | 66(1) |
| C(28A) | 6750(2)  | 3261(1) | 1629(1)  | 29(1) |
| C(29A) | 7542(2)  | 3805(1) | 1869(1)  | 32(1) |
| C(30A) | 6859(2)  | 3854(1) | 1121(1)  | 32(1) |
| C(31A) | 7264(2)  | 3716(2) | 444(1)   | 41(1) |
| C(32A) | 7815(2)  | 4359(2) | 250(2)   | 52(1) |
| C(33A) | 6553(2)  | 2553(1) | 5686(1)  | 30(1) |
| C(34A) | 6498(2)  | 2570(1) | 6491(1)  | 32(1) |
| C(35A) | 7492(2)  | 2688(1) | 6985(1)  | 36(1) |
| C(36A) | 8222(2)  | 2172(2) | 6816(1)  | 36(1) |
| C(37A) | 8175(2)  | 2167(2) | 5989(1)  | 39(1) |
| C(38A) | 7657(2)  | 3251(1) | 8168(1)  | 41(1) |
| C(39A) | 9543(2)  | 2134(2) | 7883(1)  | 42(1) |
| C(40A) | 3979(2)  | 1920(1) | 4155(2)  | 39(1) |
| C(41A) | 3754(2)  | 3045(2) | 4816(1)  | 41(1) |
| C(42A) | 610(2)   | 4372(2) | 2322(1)  | 37(1) |
| C(43A) | 199(3)   | 5105(2) | 2248(2)  | 63(1) |
| C(44A) | 1041(2)  | 4922(2) | 2880(2)  | 50(1) |
| C(45A) | 948(2)   | 4875(2) | 3677(2)  | 54(1) |
| C(46A) | 1747(2)  | 4419(2) | 4138(2)  | 49(1) |
| O(1B)  | 7128(1)  | 1377(1) | 10102(1) | 28(1) |
| O(2B)  | 9131(1)  | 1854(1) | 10873(1) | 29(1) |
| O(3B)  | 9294(1)  | 938(1)  | 11660(1) | 36(1) |
| O(4B)  | 8309(1)  | 1590(1) | 12894(1) | 23(1) |
| O(5B)  | 6472(1)  | 892(1)  | 12136(1) | 24(1) |
| O(6B)  | 7194(1)  | 231(1)  | 11406(1) | 36(1) |
| O(7B)  | 5177(1)  | 1010(1) | 8085(1)  | 27(1) |
| O(8B)  | 5917(1)  | 960(1)  | 7111(1)  | 30(1) |
| O(9B)  | 5272(1)  | 61(1)   | 5314(1)  | 43(1) |
| O(10B) | 3444(1)  | 245(1)  | 5718(1)  | 37(1) |
| O(11B) | 3693(1)  | 92(1)   | 7297(1)  | 33(1) |
| O(12B) | 10042(1) | 2178(1) | 14914(1) | 27(1) |
| O(13B) | 10449(1) | 1250(1) | 15690(1) | 32(1) |
| O(14B) | 11593(1) | 2972(1) | 15719(1) | 33(1) |
| O(15B) | 12211(1) | 969(1)  | 17411(1) | 40(1) |
| O(16B) | 12347(1) | 2503(1) | 17205(1) | 35(1) |
| C(1B)  | 6296(2)  | 958(1)  | 10118(1) | 25(1) |
| C(2B)  | 5476(2)  | 1081(1) | 9425(1)  | 27(1) |
| C(3B)  | 5908(2)  | 892(1)  | 8759(1)  | 25(1) |
| C(4B)  | 6832(2)  | 1297(1) | 8761(1)  | 32(1) |
| C(5B)  | 7544(2)  | 1177(1) | 9494(1)  | 30(1) |
| C(6B)  | 6049(2)  | 1122(1) | 10859(1) | 26(1) |
| C(7B)  | 6654(2)  | 698(1)  | 11483(1) | 24(1) |
| C(8B)  | 6833(2)  | 430(1)  | 12774(1) | 24(1) |



|        |          |         |          |       |
|--------|----------|---------|----------|-------|
| C(9B)  | 7252(2)  | 886(1)  | 13438(1) | 25(1) |
| C(10B) | 8274(2)  | 1130(1) | 13500(1) | 24(1) |
| C(11B) | 8693(2)  | 1500(1) | 14231(1) | 27(1) |
| C(12B) | 9696(2)  | 1779(1) | 14240(1) | 25(1) |
| C(13B) | 9736(2)  | 2240(1) | 13565(1) | 25(1) |
| C(14B) | 9284(2)  | 1785(1) | 12890(1) | 24(1) |
| C(15B) | 9239(2)  | 2109(1) | 12135(1) | 27(1) |
| C(16B) | 9216(2)  | 1561(1) | 11547(1) | 26(1) |
| C(17B) | 9231(2)  | 1382(1) | 10274(1) | 30(1) |
| C(18B) | 8486(2)  | 1583(2) | 9579(1)  | 34(1) |
| C(19B) | 4653(2)  | 566(2)  | 9445(1)  | 37(1) |
| C(20B) | 5116(2)  | 1844(1) | 9387(1)  | 39(1) |
| C(21B) | 5280(2)  | 595(1)  | 7480(1)  | 25(1) |
| C(22B) | 4293(2)  | 522(1)  | 6958(1)  | 25(1) |
| C(23B) | 4362(2)  | 181(1)  | 6228(1)  | 28(1) |
| C(24B) | 5142(2)  | 511(1)  | 5903(1)  | 32(1) |
| C(25B) | 6071(2)  | 565(1)  | 6489(1)  | 31(1) |
| C(26B) | 2961(2)  | -400(2) | 5523(2)  | 53(1) |
| C(27B) | 5781(2)  | 387(2)  | 4818(2)  | 51(1) |
| C(28B) | 5993(2)  | -6(1)   | 12873(1) | 26(1) |
| C(29B) | 6178(2)  | -732(1) | 13214(1) | 33(1) |
| C(30B) | 5714(2)  | -645(1) | 12400(1) | 31(1) |
| C(31B) | 4671(2)  | -814(2) | 12096(1) | 42(1) |
| C(32B) | 4251(2)  | -363(2) | 11415(2) | 71(1) |
| C(33B) | 10806(2) | 1870(1) | 15406(1) | 26(1) |
| C(34B) | 11192(2) | 2388(1) | 16027(1) | 25(1) |
| C(35B) | 11968(2) | 2022(1) | 16615(1) | 27(1) |
| C(36B) | 11533(2) | 1370(1) | 16880(1) | 31(1) |
| C(37B) | 11187(2) | 894(1)  | 16213(1) | 34(1) |
| C(38B) | 13384(2) | 2523(2) | 17374(1) | 39(1) |
| C(39B) | 12213(2) | 1096(2) | 18159(1) | 49(1) |
| C(40B) | 9190(2)  | 2933(1) | 13580(1) | 32(1) |
| C(41B) | 10798(2) | 2391(1) | 13576(1) | 35(1) |
| C(42B) | 10257(2) | 1415(1) | 10194(1) | 32(1) |
| C(43B) | 10629(2) | 811(2)  | 9804(1)  | 45(1) |
| C(44B) | 10998(2) | 919(1)  | 10629(1) | 36(1) |
| C(45B) | 12026(2) | 1155(2) | 10932(2) | 44(1) |
| C(46B) | 12132(2) | 1587(2) | 11638(2) | 52(1) |
| O(1W)  | 5457(6)  | 2483(4) | 7763(4)  | 61(2) |

---

**Table S3. Bond lengths [Å] and angles [°] for cocosolide (1)**

---

|               |          |
|---------------|----------|
| O(1A)-C(5A)   | 1.427(3) |
| O(1A)-C(1A)   | 1.434(3) |
| O(2A)-C(7A)   | 1.202(3) |
| O(3A)-C(7A)   | 1.350(3) |
| O(3A)-C(8A)   | 1.470(3) |
| O(4A)-C(10A)  | 1.434(3) |
| O(4A)-C(14A)  | 1.435(3) |
| O(5A)-C(16A)  | 1.199(3) |
| O(6A)-C(16A)  | 1.353(3) |
| O(6A)-C(17A)  | 1.464(3) |
| O(7A)-C(21A)  | 1.400(3) |
| O(7A)-C(3A)   | 1.449(3) |
| O(8A)-C(22A)  | 1.431(3) |
| O(9A)-C(26A)  | 1.415(3) |
| O(9A)-C(23A)  | 1.422(3) |
| O(10A)-C(24A) | 1.423(3) |
| O(10A)-C(27A) | 1.436(3) |
| O(11A)-C(21A) | 1.429(3) |
| O(11A)-C(25A) | 1.436(3) |
| O(12A)-C(33A) | 1.395(3) |
| O(12A)-C(12A) | 1.447(3) |
| O(13A)-C(33A) | 1.426(3) |
| O(13A)-C(37A) | 1.443(3) |
| O(14A)-C(34A) | 1.423(3) |
| O(15A)-C(38A) | 1.402(3) |
| O(15A)-C(35A) | 1.438(3) |
| O(16A)-C(39A) | 1.408(3) |
| O(16A)-C(36A) | 1.422(3) |
| C(1A)-C(6A)   | 1.523(3) |
| C(1A)-C(2A)   | 1.545(3) |
| C(2A)-C(19A)  | 1.527(3) |
| C(2A)-C(20A)  | 1.528(3) |
| C(2A)-C(3A)   | 1.540(3) |
| C(3A)-C(4A)   | 1.518(3) |
| C(4A)-C(5A)   | 1.524(3) |
| C(5A)-C(18A)  | 1.519(3) |
| C(6A)-C(7A)   | 1.501(3) |
| C(8A)-C(28A)  | 1.497(3) |
| C(8A)-C(9A)   | 1.523(3) |
| C(9A)-C(10A)  | 1.514(3) |
| C(10A)-C(11A) | 1.519(3) |
| C(11A)-C(12A) | 1.514(3) |
| C(12A)-C(13A) | 1.538(3) |
| C(13A)-C(40A) | 1.536(3) |

|               |          |
|---------------|----------|
| C(13A)-C(41A) | 1.543(3) |
| C(13A)-C(14A) | 1.545(3) |
| C(14A)-C(15A) | 1.515(3) |
| C(15A)-C(16A) | 1.506(3) |
| C(17A)-C(42A) | 1.494(3) |
| C(17A)-C(18A) | 1.523(3) |
| C(21A)-C(22A) | 1.528(3) |
| C(22A)-C(23A) | 1.513(3) |
| C(23A)-C(24A) | 1.514(3) |
| C(24A)-C(25A) | 1.524(3) |
| C(28A)-C(30A) | 1.498(3) |
| C(28A)-C(29A) | 1.519(3) |
| C(29A)-C(30A) | 1.507(3) |
| C(30A)-C(31A) | 1.516(3) |
| C(31A)-C(32A) | 1.535(4) |
| C(33A)-C(34A) | 1.513(3) |
| C(34A)-C(35A) | 1.517(3) |
| C(35A)-C(36A) | 1.510(4) |
| C(36A)-C(37A) | 1.521(3) |
| C(42A)-C(44A) | 1.500(4) |
| C(42A)-C(43A) | 1.503(4) |
| C(43A)-C(44A) | 1.514(4) |
| C(44A)-C(45A) | 1.516(4) |
| C(45A)-C(46A) | 1.528(4) |
| O(1B)-C(1B)   | 1.430(3) |
| O(1B)-C(5B)   | 1.436(3) |
| O(2B)-C(16B)  | 1.349(3) |
| O(2B)-C(17B)  | 1.461(3) |
| O(3B)-C(16B)  | 1.202(3) |
| O(4B)-C(10B)  | 1.434(3) |
| O(4B)-C(14B)  | 1.434(3) |
| O(5B)-C(7B)   | 1.346(3) |
| O(5B)-C(8B)   | 1.469(3) |
| O(6B)-C(7B)   | 1.201(3) |
| O(7B)-C(21B)  | 1.405(3) |
| O(7B)-C(3B)   | 1.452(3) |
| O(8B)-C(21B)  | 1.430(3) |
| O(8B)-C(25B)  | 1.433(3) |
| O(9B)-C(27B)  | 1.431(3) |
| O(9B)-C(24B)  | 1.432(3) |
| O(10B)-C(26B) | 1.411(3) |
| O(10B)-C(23B) | 1.433(3) |
| O(11B)-C(22B) | 1.424(3) |
| O(12B)-C(33B) | 1.382(3) |
| O(12B)-C(12B) | 1.450(3) |
| O(13B)-C(37B) | 1.427(3) |

|               |          |
|---------------|----------|
| O(13B)-C(33B) | 1.429(3) |
| O(14B)-C(34B) | 1.423(3) |
| O(15B)-C(39B) | 1.408(3) |
| O(15B)-C(36B) | 1.431(3) |
| O(16B)-C(35B) | 1.434(3) |
| O(16B)-C(38B) | 1.435(3) |
| C(1B)-C(6B)   | 1.524(3) |
| C(1B)-C(2B)   | 1.547(3) |
| C(2B)-C(19B)  | 1.531(3) |
| C(2B)-C(20B)  | 1.531(3) |
| C(2B)-C(3B)   | 1.539(3) |
| C(3B)-C(4B)   | 1.520(3) |
| C(4B)-C(5B)   | 1.518(3) |
| C(5B)-C(18B)  | 1.519(3) |
| C(6B)-C(7B)   | 1.509(3) |
| C(8B)-C(28B)  | 1.497(3) |
| C(8B)-C(9B)   | 1.514(3) |
| C(9B)-C(10B)  | 1.503(3) |
| C(10B)-C(11B) | 1.523(3) |
| C(11B)-C(12B) | 1.515(3) |
| C(12B)-C(13B) | 1.539(3) |
| C(13B)-C(40B) | 1.529(3) |
| C(13B)-C(41B) | 1.531(3) |
| C(13B)-C(14B) | 1.538(3) |
| C(14B)-C(15B) | 1.517(3) |
| C(15B)-C(16B) | 1.502(3) |
| C(17B)-C(42B) | 1.498(3) |
| C(17B)-C(18B) | 1.521(3) |
| C(21B)-C(22B) | 1.521(3) |
| C(22B)-C(23B) | 1.522(3) |
| C(23B)-C(24B) | 1.511(3) |
| C(24B)-C(25B) | 1.513(3) |
| C(28B)-C(30B) | 1.496(3) |
| C(28B)-C(29B) | 1.514(3) |
| C(29B)-C(30B) | 1.514(3) |
| C(30B)-C(31B) | 1.496(3) |
| C(31B)-C(32B) | 1.530(4) |
| C(33B)-C(34B) | 1.519(3) |
| C(34B)-C(35B) | 1.533(3) |
| C(35B)-C(36B) | 1.513(3) |
| C(36B)-C(37B) | 1.522(3) |
| C(42B)-C(44B) | 1.506(3) |
| C(42B)-C(43B) | 1.513(4) |
| C(43B)-C(44B) | 1.517(3) |
| C(44B)-C(45B) | 1.510(4) |
| C(45B)-C(46B) | 1.522(4) |

|                      |            |
|----------------------|------------|
| C(5A)-O(1A)-C(1A)    | 111.87(16) |
| C(7A)-O(3A)-C(8A)    | 117.69(18) |
| C(10A)-O(4A)-C(14A)  | 111.75(17) |
| C(16A)-O(6A)-C(17A)  | 116.90(18) |
| C(21A)-O(7A)-C(3A)   | 116.55(17) |
| C(26A)-O(9A)-C(23A)  | 114.4(2)   |
| C(24A)-O(10A)-C(27A) | 113.4(2)   |
| C(21A)-O(11A)-C(25A) | 111.55(17) |
| C(33A)-O(12A)-C(12A) | 114.90(18) |
| C(33A)-O(13A)-C(37A) | 110.73(19) |
| C(38A)-O(15A)-C(35A) | 115.6(2)   |
| C(39A)-O(16A)-C(36A) | 116.1(2)   |
| O(1A)-C(1A)-C(6A)    | 105.91(18) |
| O(1A)-C(1A)-C(2A)    | 111.39(18) |
| C(6A)-C(1A)-C(2A)    | 114.48(19) |
| C(19A)-C(2A)-C(20A)  | 109.9(2)   |
| C(19A)-C(2A)-C(3A)   | 108.67(19) |
| C(20A)-C(2A)-C(3A)   | 110.64(19) |
| C(19A)-C(2A)-C(1A)   | 108.66(19) |
| C(20A)-C(2A)-C(1A)   | 111.4(2)   |
| C(3A)-C(2A)-C(1A)    | 107.49(18) |
| O(7A)-C(3A)-C(4A)    | 111.40(18) |
| O(7A)-C(3A)-C(2A)    | 107.33(18) |
| C(4A)-C(3A)-C(2A)    | 112.70(19) |
| C(3A)-C(4A)-C(5A)    | 109.07(19) |
| O(1A)-C(5A)-C(18A)   | 106.56(18) |
| O(1A)-C(5A)-C(4A)    | 110.57(18) |
| C(18A)-C(5A)-C(4A)   | 115.4(2)   |
| C(7A)-C(6A)-C(1A)    | 114.6(2)   |
| O(2A)-C(7A)-O(3A)    | 124.7(2)   |
| O(2A)-C(7A)-C(6A)    | 126.1(2)   |
| O(3A)-C(7A)-C(6A)    | 109.1(2)   |
| O(3A)-C(8A)-C(28A)   | 107.87(18) |
| O(3A)-C(8A)-C(9A)    | 107.19(19) |
| C(28A)-C(8A)-C(9A)   | 112.27(19) |
| C(10A)-C(9A)-C(8A)   | 115.0(2)   |
| O(4A)-C(10A)-C(9A)   | 108.23(18) |
| O(4A)-C(10A)-C(11A)  | 109.37(18) |
| C(9A)-C(10A)-C(11A)  | 113.78(19) |
| C(12A)-C(11A)-C(10A) | 110.14(19) |
| O(12A)-C(12A)-C(11A) | 112.30(19) |
| O(12A)-C(12A)-C(13A) | 108.30(18) |
| C(11A)-C(12A)-C(13A) | 112.6(2)   |
| C(40A)-C(13A)-C(12A) | 112.1(2)   |
| C(40A)-C(13A)-C(41A) | 109.7(2)   |

C(12A)-C(13A)-C(41A) 108.2(2)  
C(40A)-C(13A)-C(14A) 110.7(2)  
C(12A)-C(13A)-C(14A) 106.12(18)  
C(41A)-C(13A)-C(14A) 109.9(2)  
O(4A)-C(14A)-C(15A) 104.83(18)  
O(4A)-C(14A)-C(13A) 112.34(18)  
C(15A)-C(14A)-C(13A) 114.35(19)  
C(16A)-C(15A)-C(14A) 113.6(2)  
O(5A)-C(16A)-O(6A) 124.4(2)  
O(5A)-C(16A)-C(15A) 125.8(2)  
O(6A)-C(16A)-C(15A) 109.8(2)  
O(6A)-C(17A)-C(42A) 104.97(18)  
O(6A)-C(17A)-C(18A) 108.44(19)  
C(42A)-C(17A)-C(18A) 116.5(2)  
C(5A)-C(18A)-C(17A) 111.8(2)  
O(7A)-C(21A)-O(11A) 107.33(18)  
O(7A)-C(21A)-C(22A) 107.10(18)  
O(11A)-C(21A)-C(22A) 109.13(18)  
O(8A)-C(22A)-C(23A) 107.17(19)  
O(8A)-C(22A)-C(21A) 110.28(18)  
C(23A)-C(22A)-C(21A) 111.53(19)  
O(9A)-C(23A)-C(22A) 108.37(19)  
O(9A)-C(23A)-C(24A) 110.6(2)  
C(22A)-C(23A)-C(24A) 111.00(19)  
O(10A)-C(24A)-C(23A) 108.0(2)  
O(10A)-C(24A)-C(25A) 111.0(2)  
C(23A)-C(24A)-C(25A) 110.3(2)  
O(11A)-C(25A)-C(24A) 110.7(2)  
C(8A)-C(28A)-C(30A) 120.5(2)  
C(8A)-C(28A)-C(29A) 117.4(2)  
C(30A)-C(28A)-C(29A) 59.94(16)  
C(30A)-C(29A)-C(28A) 59.35(15)  
C(28A)-C(30A)-C(29A) 60.71(15)  
C(28A)-C(30A)-C(31A) 120.3(2)  
C(29A)-C(30A)-C(31A) 117.8(2)  
C(30A)-C(31A)-C(32A) 111.4(2)  
O(12A)-C(33A)-O(13A) 107.69(18)  
O(12A)-C(33A)-C(34A) 109.3(2)  
O(13A)-C(33A)-C(34A) 109.9(2)  
O(14A)-C(34A)-C(33A) 107.6(2)  
O(14A)-C(34A)-C(35A) 109.7(2)  
C(33A)-C(34A)-C(35A) 110.6(2)  
O(15A)-C(35A)-C(36A) 110.7(2)  
O(15A)-C(35A)-C(34A) 109.3(2)  
C(36A)-C(35A)-C(34A) 111.5(2)  
O(16A)-C(36A)-C(35A) 112.4(2)

O(16A)-C(36A)-C(37A) 105.17(19)  
C(35A)-C(36A)-C(37A) 109.6(2)  
O(13A)-C(37A)-C(36A) 111.25(19)  
C(17A)-C(42A)-C(44A) 118.1(2)  
C(17A)-C(42A)-C(43A) 121.2(2)  
C(44A)-C(42A)-C(43A) 60.56(19)  
C(42A)-C(43A)-C(44A) 59.60(18)  
C(42A)-C(44A)-C(43A) 59.84(19)  
C(42A)-C(44A)-C(45A) 121.3(3)  
C(43A)-C(44A)-C(45A) 122.7(3)  
C(44A)-C(45A)-C(46A) 111.3(2)  
C(1B)-O(1B)-C(5B) 110.99(17)  
C(16B)-O(2B)-C(17B) 116.62(19)  
C(10B)-O(4B)-C(14B) 111.39(16)  
C(7B)-O(5B)-C(8B) 117.27(17)  
C(21B)-O(7B)-C(3B) 114.78(17)  
C(21B)-O(8B)-C(25B) 111.06(17)  
C(27B)-O(9B)-C(24B) 113.8(2)  
C(26B)-O(10B)-C(23B) 114.46(19)  
C(33B)-O(12B)-C(12B) 114.41(17)  
C(37B)-O(13B)-C(33B) 111.87(18)  
C(39B)-O(15B)-C(36B) 116.06(19)  
C(35B)-O(16B)-C(38B) 112.03(18)  
O(1B)-C(1B)-C(6B) 105.36(18)  
O(1B)-C(1B)-C(2B) 111.71(18)  
C(6B)-C(1B)-C(2B) 115.88(19)  
C(19B)-C(2B)-C(20B) 110.8(2)  
C(19B)-C(2B)-C(3B) 108.38(19)  
C(20B)-C(2B)-C(3B) 111.9(2)  
C(19B)-C(2B)-C(1B) 108.62(19)  
C(20B)-C(2B)-C(1B) 111.2(2)  
C(3B)-C(2B)-C(1B) 105.70(19)  
O(7B)-C(3B)-C(4B) 111.95(18)  
O(7B)-C(3B)-C(2B) 108.57(18)  
C(4B)-C(3B)-C(2B) 112.32(19)  
C(5B)-C(4B)-C(3B) 109.14(19)  
O(1B)-C(5B)-C(4B) 110.7(2)  
O(1B)-C(5B)-C(18B) 107.00(19)  
C(4B)-C(5B)-C(18B) 114.3(2)  
C(7B)-C(6B)-C(1B) 112.12(19)  
O(6B)-C(7B)-O(5B) 124.4(2)  
O(6B)-C(7B)-C(6B) 124.8(2)  
O(5B)-C(7B)-C(6B) 110.66(19)  
O(5B)-C(8B)-C(28B) 106.55(17)  
O(5B)-C(8B)-C(9B) 108.49(18)  
C(28B)-C(8B)-C(9B) 113.27(18)

|                      |            |
|----------------------|------------|
| C(10B)-C(9B)-C(8B)   | 115.80(19) |
| O(4B)-C(10B)-C(9B)   | 109.32(17) |
| O(4B)-C(10B)-C(11B)  | 110.00(18) |
| C(9B)-C(10B)-C(11B)  | 112.83(18) |
| C(12B)-C(11B)-C(10B) | 110.43(19) |
| O(12B)-C(12B)-C(11B) | 109.11(18) |
| O(12B)-C(12B)-C(13B) | 109.69(19) |
| C(11B)-C(12B)-C(13B) | 113.36(18) |
| C(40B)-C(13B)-C(41B) | 110.0(2)   |
| C(40B)-C(13B)-C(14B) | 112.14(19) |
| C(41B)-C(13B)-C(14B) | 110.20(19) |
| C(40B)-C(13B)-C(12B) | 111.27(19) |
| C(41B)-C(13B)-C(12B) | 108.18(19) |
| C(14B)-C(13B)-C(12B) | 104.93(18) |
| O(4B)-C(14B)-C(15B)  | 105.57(17) |
| O(4B)-C(14B)-C(13B)  | 111.54(17) |
| C(15B)-C(14B)-C(13B) | 116.58(19) |
| C(16B)-C(15B)-C(14B) | 112.2(2)   |
| O(3B)-C(16B)-O(2B)   | 123.6(2)   |
| O(3B)-C(16B)-C(15B)  | 124.7(2)   |
| O(2B)-C(16B)-C(15B)  | 111.7(2)   |
| O(2B)-C(17B)-C(42B)  | 108.22(19) |
| O(2B)-C(17B)-C(18B)  | 108.8(2)   |
| C(42B)-C(17B)-C(18B) | 114.4(2)   |
| C(5B)-C(18B)-C(17B)  | 112.9(2)   |
| O(7B)-C(21B)-O(8B)   | 107.53(18) |
| O(7B)-C(21B)-C(22B)  | 108.27(18) |
| O(8B)-C(21B)-C(22B)  | 109.32(18) |
| O(11B)-C(22B)-C(21B) | 109.19(18) |
| O(11B)-C(22B)-C(23B) | 108.30(19) |
| C(21B)-C(22B)-C(23B) | 111.79(19) |
| O(10B)-C(23B)-C(24B) | 109.95(19) |
| O(10B)-C(23B)-C(22B) | 108.72(19) |
| C(24B)-C(23B)-C(22B) | 112.2(2)   |
| O(9B)-C(24B)-C(23B)  | 106.8(2)   |
| O(9B)-C(24B)-C(25B)  | 110.4(2)   |
| C(23B)-C(24B)-C(25B) | 109.97(19) |
| O(8B)-C(25B)-C(24B)  | 110.30(19) |
| C(30B)-C(28B)-C(8B)  | 119.4(2)   |
| C(30B)-C(28B)-C(29B) | 60.39(16)  |
| C(8B)-C(28B)-C(29B)  | 119.2(2)   |
| C(30B)-C(29B)-C(28B) | 59.22(15)  |
| C(31B)-C(30B)-C(28B) | 120.2(2)   |
| C(31B)-C(30B)-C(29B) | 121.6(2)   |
| C(28B)-C(30B)-C(29B) | 60.39(15)  |
| C(30B)-C(31B)-C(32B) | 111.2(2)   |



O(12B)-C(33B)-O(13B) 107.47(18)  
O(12B)-C(33B)-C(34B) 108.84(19)  
O(13B)-C(33B)-C(34B) 110.55(18)  
O(14B)-C(34B)-C(33B) 108.02(18)  
O(14B)-C(34B)-C(35B) 110.45(18)  
C(33B)-C(34B)-C(35B) 108.96(19)  
O(16B)-C(35B)-C(36B) 112.53(19)  
O(16B)-C(35B)-C(34B) 109.92(19)  
C(36B)-C(35B)-C(34B) 108.68(19)  
O(15B)-C(36B)-C(35B) 113.4(2)  
O(15B)-C(36B)-C(37B) 106.7(2)  
C(35B)-C(36B)-C(37B) 107.5(2)  
O(13B)-C(37B)-C(36B) 109.0(2)  
C(17B)-C(42B)-C(44B) 119.9(2)  
C(17B)-C(42B)-C(43B) 117.8(2)  
C(44B)-C(42B)-C(43B) 60.33(17)  
C(42B)-C(43B)-C(44B) 59.61(16)  
C(42B)-C(44B)-C(45B) 121.0(2)  
C(42B)-C(44B)-C(43B) 60.06(17)  
C(45B)-C(44B)-C(43B) 120.2(2)  
C(44B)-C(45B)-C(46B) 112.4(2)

---

Symmetry transformations used to generate equivalent atoms:

**Table S4. Anisotropic displacement parameters ( $\text{\AA}^2 \times 10^3$ ) for cocosolide (1). The anisotropic displacement factor exponent takes the form:  $-2\pi^2 [h^2 a^{*2} U^{11} + \dots + 2 h k a^* b^* U^{12}]$**

|        | U11   | U22   | U33   | U23    | U13   | U12    |
|--------|-------|-------|-------|--------|-------|--------|
| O(1A)  | 24(1) | 33(1) | 27(1) | 7(1)   | 7(1)  | 6(1)   |
| O(2A)  | 36(1) | 25(1) | 47(1) | -3(1)  | -4(1) | 4(1)   |
| O(3A)  | 20(1) | 28(1) | 31(1) | 0(1)   | -1(1) | 0(1)   |
| O(4A)  | 22(1) | 31(1) | 31(1) | -3(1)  | 5(1)  | 0(1)   |
| O(5A)  | 34(1) | 34(1) | 42(1) | 4(1)   | 6(1)  | -8(1)  |
| O(6A)  | 22(1) | 27(1) | 29(1) | 3(1)   | 5(1)  | 4(1)   |
| O(7A)  | 29(1) | 27(1) | 24(1) | 2(1)   | 1(1)  | 1(1)   |
| O(8A)  | 38(1) | 37(1) | 33(1) | 3(1)   | 13(1) | 8(1)   |
| O(9A)  | 63(1) | 32(1) | 22(1) | 0(1)   | 4(1)  | -5(1)  |
| O(10A) | 50(1) | 38(1) | 39(1) | 9(1)   | -4(1) | 11(1)  |
| O(11A) | 27(1) | 36(1) | 28(1) | 7(1)   | 6(1)  | 7(1)   |
| O(12A) | 26(1) | 33(1) | 32(1) | 4(1)   | 3(1)  | 0(1)   |
| O(13A) | 26(1) | 48(1) | 28(1) | -9(1)  | 3(1)  | 0(1)   |
| O(14A) | 84(2) | 44(1) | 50(1) | 0(1)   | 31(1) | 25(1)  |
| O(15A) | 74(1) | 50(1) | 25(1) | -12(1) | 19(1) | -29(1) |
| O(16A) | 37(1) | 83(2) | 29(1) | 14(1)  | -6(1) | -28(1) |
| C(1A)  | 26(1) | 27(1) | 21(1) | 2(1)   | 4(1)  | 1(1)   |
| C(2A)  | 26(1) | 27(1) | 26(1) | 0(1)   | 6(1)  | -1(1)  |
| C(3A)  | 27(1) | 26(1) | 22(1) | 1(1)   | 1(1)  | -4(1)  |
| C(4A)  | 26(1) | 32(1) | 27(1) | 3(1)   | 4(1)  | 5(1)   |
| C(5A)  | 24(1) | 29(1) | 26(1) | 3(1)   | 5(1)  | 4(1)   |
| C(6A)  | 24(1) | 28(1) | 28(1) | 0(1)   | 3(1)  | 2(1)   |
| C(7A)  | 21(1) | 31(1) | 26(1) | 4(1)   | 8(1)  | 4(1)   |
| C(8A)  | 20(1) | 30(1) | 28(1) | -1(1)  | 1(1)  | 1(1)   |
| C(9A)  | 20(1) | 34(2) | 30(1) | 0(1)   | 2(1)  | 4(1)   |
| C(10A) | 22(1) | 28(1) | 30(1) | -2(1)  | 3(1)  | 2(1)   |
| C(11A) | 23(1) | 35(1) | 31(1) | -2(1)  | 2(1)  | 2(1)   |
| C(12A) | 29(1) | 27(1) | 27(1) | 3(1)   | 4(1)  | 1(1)   |
| C(13A) | 22(1) | 29(1) | 36(1) | 3(1)   | 6(1)  | 2(1)   |
| C(14A) | 24(1) | 26(1) | 32(1) | -1(1)  | 8(1)  | 2(1)   |
| C(15A) | 22(1) | 29(1) | 32(1) | 1(1)   | 5(1)  | 2(1)   |
| C(16A) | 25(1) | 27(1) | 28(1) | -4(1)  | 11(1) | 3(1)   |
| C(17A) | 34(1) | 29(1) | 28(1) | 7(1)   | 11(1) | 10(1)  |
| C(18A) | 28(1) | 36(2) | 28(1) | 3(1)   | 7(1)  | 8(1)   |
| C(19A) | 30(1) | 49(2) | 28(1) | -1(1)  | 7(1)  | 2(1)   |
| C(20A) | 29(1) | 29(1) | 41(2) | -5(1)  | -2(1) | 4(1)   |
| C(21A) | 24(1) | 24(1) | 28(1) | 3(1)   | 5(1)  | 1(1)   |
| C(22A) | 32(1) | 24(1) | 26(1) | -1(1)  | 6(1)  | -1(1)  |
| C(23A) | 40(2) | 22(1) | 24(1) | 1(1)   | 4(1)  | -4(1)  |
| C(24A) | 35(2) | 26(1) | 29(1) | 4(1)   | -2(1) | 1(1)   |

|        |       |       |       |        |       |        |
|--------|-------|-------|-------|--------|-------|--------|
| C(25A) | 30(1) | 35(2) | 32(1) | 5(1)   | 0(1)  | 8(1)   |
| C(26A) | 66(2) | 55(2) | 26(2) | 4(1)   | 10(2) | -3(2)  |
| C(27A) | 53(2) | 82(3) | 55(2) | 4(2)   | -5(2) | 36(2)  |
| C(28A) | 22(1) | 31(1) | 32(1) | 0(1)   | 3(1)  | 1(1)   |
| C(29A) | 26(1) | 29(1) | 40(2) | -1(1)  | 5(1)  | 0(1)   |
| C(30A) | 25(1) | 36(2) | 35(2) | 6(1)   | 6(1)  | 6(1)   |
| C(31A) | 31(2) | 54(2) | 37(2) | 6(1)   | 6(1)  | -1(1)  |
| C(32A) | 40(2) | 72(2) | 46(2) | 16(2)  | 12(1) | -5(2)  |
| C(33A) | 32(1) | 29(1) | 29(1) | -2(1)  | 4(1)  | -5(1)  |
| C(34A) | 40(2) | 27(1) | 32(1) | -3(1)  | 12(1) | -1(1)  |
| C(35A) | 54(2) | 31(2) | 24(1) | -1(1)  | 13(1) | -16(1) |
| C(36A) | 30(1) | 48(2) | 29(1) | 2(1)   | 3(1)  | -14(1) |
| C(37A) | 25(1) | 63(2) | 27(1) | -2(1)  | 1(1)  | -5(1)  |
| C(38A) | 48(2) | 43(2) | 30(2) | -10(1) | 3(1)  | 8(1)   |
| C(39A) | 40(2) | 53(2) | 29(2) | 7(1)   | 0(1)  | 6(1)   |
| C(40A) | 30(1) | 38(2) | 46(2) | 10(1)  | 0(1)  | -7(1)  |
| C(41A) | 34(2) | 52(2) | 41(2) | 5(1)   | 15(1) | 9(1)   |
| C(42A) | 42(2) | 42(2) | 30(1) | 3(1)   | 12(1) | 19(1)  |
| C(43A) | 88(3) | 62(2) | 43(2) | 9(2)   | 21(2) | 47(2)  |
| C(44A) | 71(2) | 42(2) | 41(2) | 4(1)   | 21(2) | 22(2)  |
| C(45A) | 70(2) | 60(2) | 37(2) | -1(2)  | 20(2) | 29(2)  |
| C(46A) | 54(2) | 61(2) | 34(2) | 4(2)   | 15(1) | 15(2)  |
| O(1B)  | 31(1) | 31(1) | 23(1) | -3(1)  | 10(1) | -8(1)  |
| O(2B)  | 34(1) | 31(1) | 22(1) | 3(1)   | 9(1)  | -3(1)  |
| O(3B)  | 51(1) | 30(1) | 29(1) | 3(1)   | 12(1) | 1(1)   |
| O(4B)  | 22(1) | 27(1) | 21(1) | 2(1)   | 5(1)  | -3(1)  |
| O(5B)  | 28(1) | 25(1) | 19(1) | -1(1)  | 6(1)  | -2(1)  |
| O(6B)  | 44(1) | 39(1) | 27(1) | 2(1)   | 14(1) | 11(1)  |
| O(7B)  | 34(1) | 26(1) | 21(1) | -3(1)  | 5(1)  | 3(1)   |
| O(8B)  | 38(1) | 30(1) | 23(1) | -2(1)  | 11(1) | -6(1)  |
| O(9B)  | 62(1) | 44(1) | 30(1) | -12(1) | 21(1) | -5(1)  |
| O(10B) | 36(1) | 36(1) | 32(1) | -2(1)  | -6(1) | 2(1)   |
| O(11B) | 31(1) | 35(1) | 36(1) | 2(1)   | 12(1) | 1(1)   |
| O(12B) | 26(1) | 30(1) | 22(1) | -5(1)  | -2(1) | 2(1)   |
| O(13B) | 24(1) | 31(1) | 36(1) | 5(1)   | 1(1)  | -7(1)  |
| O(14B) | 40(1) | 30(1) | 28(1) | -2(1)  | 5(1)  | -9(1)  |
| O(15B) | 37(1) | 54(1) | 30(1) | 13(1)  | 8(1)  | 16(1)  |
| O(16B) | 32(1) | 40(1) | 26(1) | -10(1) | -5(1) | 6(1)   |
| C(1B)  | 29(1) | 23(1) | 23(1) | -2(1)  | 9(1)  | -4(1)  |
| C(2B)  | 30(1) | 29(1) | 23(1) | -1(1)  | 7(1)  | 2(1)   |
| C(3B)  | 28(1) | 27(1) | 21(1) | -1(1)  | 7(1)  | -1(1)  |
| C(4B)  | 39(2) | 36(2) | 23(1) | -1(1)  | 9(1)  | -6(1)  |
| C(5B)  | 33(1) | 37(2) | 22(1) | -2(1)  | 13(1) | -4(1)  |
| C(6B)  | 27(1) | 29(1) | 23(1) | -1(1)  | 7(1)  | 2(1)   |
| C(7B)  | 25(1) | 27(1) | 24(1) | -3(1)  | 11(1) | -4(1)  |
| C(8B)  | 24(1) | 27(1) | 19(1) | 1(1)   | 5(1)  | 0(1)   |

|        |       |       |       |        |        |        |
|--------|-------|-------|-------|--------|--------|--------|
| C(9B)  | 26(1) | 28(1) | 22(1) | -3(1)  | 6(1)   | -4(1)  |
| C(10B) | 26(1) | 24(1) | 20(1) | 1(1)   | 5(1)   | -1(1)  |
| C(11B) | 25(1) | 32(1) | 22(1) | -1(1)  | 3(1)   | -2(1)  |
| C(12B) | 24(1) | 27(1) | 22(1) | -4(1)  | 1(1)   | 1(1)   |
| C(13B) | 21(1) | 29(1) | 25(1) | 0(1)   | 2(1)   | -1(1)  |
| C(14B) | 22(1) | 27(1) | 25(1) | -1(1)  | 9(1)   | -3(1)  |
| C(15B) | 28(1) | 29(1) | 24(1) | 1(1)   | 6(1)   | -2(1)  |
| C(16B) | 24(1) | 30(1) | 28(1) | 5(1)   | 10(1)  | -4(1)  |
| C(17B) | 35(1) | 33(2) | 24(1) | -5(1)  | 8(1)   | -6(1)  |
| C(18B) | 36(2) | 45(2) | 24(1) | 2(1)   | 11(1)  | -9(1)  |
| C(19B) | 35(2) | 51(2) | 26(1) | -2(1)  | 9(1)   | -8(1)  |
| C(20B) | 49(2) | 39(2) | 28(1) | -1(1)  | 5(1)   | 17(1)  |
| C(21B) | 30(1) | 24(1) | 21(1) | -1(1)  | 8(1)   | 0(1)   |
| C(22B) | 31(1) | 22(1) | 23(1) | 1(1)   | 8(1)   | 3(1)   |
| C(23B) | 32(1) | 28(1) | 22(1) | 0(1)   | 1(1)   | 4(1)   |
| C(24B) | 48(2) | 30(1) | 21(1) | -3(1)  | 12(1)  | 6(1)   |
| C(25B) | 40(2) | 32(1) | 24(1) | -1(1)  | 14(1)  | 0(1)   |
| C(26B) | 49(2) | 46(2) | 52(2) | -12(2) | -13(2) | 0(2)   |
| C(27B) | 75(2) | 57(2) | 30(2) | 5(1)   | 28(2)  | 14(2)  |
| C(28B) | 28(1) | 26(1) | 24(1) | -2(1)  | 8(1)   | -4(1)  |
| C(29B) | 38(2) | 30(1) | 31(1) | 5(1)   | 7(1)   | -3(1)  |
| C(30B) | 36(2) | 33(1) | 25(1) | -6(1)  | 9(1)   | -10(1) |
| C(31B) | 44(2) | 47(2) | 34(2) | 0(1)   | 4(1)   | -22(1) |
| C(32B) | 57(2) | 91(3) | 49(2) | 26(2)  | -20(2) | -35(2) |
| C(33B) | 25(1) | 27(1) | 24(1) | 0(1)   | 4(1)   | -2(1)  |
| C(34B) | 25(1) | 28(1) | 23(1) | -1(1)  | 5(1)   | -2(1)  |
| C(35B) | 25(1) | 32(1) | 23(1) | -7(1)  | 3(1)   | -1(1)  |
| C(36B) | 26(1) | 39(2) | 27(1) | 10(1)  | 3(1)   | 7(1)   |
| C(37B) | 33(2) | 29(1) | 37(2) | 5(1)   | 3(1)   | -2(1)  |
| C(38B) | 34(2) | 41(2) | 36(2) | -10(1) | -6(1)  | 3(1)   |
| C(39B) | 51(2) | 66(2) | 27(2) | 0(1)   | -1(1)  | 18(2)  |
| C(40B) | 34(1) | 29(1) | 32(1) | -1(1)  | 5(1)   | -2(1)  |
| C(41B) | 26(1) | 43(2) | 33(2) | 4(1)   | 1(1)   | -7(1)  |
| C(42B) | 34(2) | 34(2) | 31(1) | -3(1)  | 13(1)  | -5(1)  |
| C(43B) | 48(2) | 55(2) | 35(2) | -12(1) | 17(1)  | -3(2)  |
| C(44B) | 40(2) | 38(2) | 32(1) | -2(1)  | 11(1)  | -2(1)  |
| C(45B) | 40(2) | 46(2) | 46(2) | 0(1)   | 9(1)   | 5(1)   |
| C(46B) | 51(2) | 52(2) | 50(2) | -8(2)  | 4(2)   | -5(2)  |
| O(1W)  | 75(6) | 38(5) | 70(6) | 5(4)   | 17(5)  | 14(4)  |

---

**Table S5. Hydrogen coordinates ( $\times 10^4$ ) and isotropic displacement parameters ( $\text{\AA}^2 \times 10^3$ ) for cocosolide (1).**

|        | x     | y    | z     | U(eq) |
|--------|-------|------|-------|-------|
| H(8A)  | 1688  | 3505 | -2793 | 42    |
| H(14A) | 5496  | 2998 | 6842  | 69    |
| H(1A)  | 2986  | 4040 | 304   | 30    |
| H(3A)  | 1664  | 4338 | -822  | 31    |
| H(4A1) | 452   | 3302 | -358  | 34    |
| H(4A2) | 209   | 4126 | -476  | 34    |
| H(5A)  | 1533  | 4415 | 499   | 32    |
| H(6A1) | 3381  | 2688 | 894   | 32    |
| H(6A2) | 3905  | 2865 | 239   | 32    |
| H(8A1) | 5814  | 3750 | 2174  | 32    |
| H(9A1) | 5949  | 2291 | 2529  | 35    |
| H(9A2) | 6839  | 2778 | 2912  | 35    |
| H(10A) | 5712  | 3489 | 3401  | 33    |
| H(11A) | 5881  | 2057 | 3912  | 36    |
| H(11B) | 6649  | 2668 | 4215  | 36    |
| H(12A) | 5506  | 3292 | 4687  | 34    |
| H(14B) | 4182  | 3607 | 3619  | 32    |
| H(15A) | 2925  | 2582 | 2811  | 34    |
| H(15B) | 2579  | 2994 | 3458  | 34    |
| H(17A) | 1677  | 4482 | 1747  | 36    |
| H(18A) | 457   | 3367 | 1079  | 37    |
| H(18B) | 66    | 4153 | 891   | 37    |
| H(19A) | 3630  | 3226 | -894  | 54    |
| H(19B) | 3340  | 4038 | -866  | 54    |
| H(19C) | 2793  | 3549 | -1533 | 54    |
| H(20A) | 1783  | 2505 | -1195 | 52    |
| H(20B) | 1622  | 2464 | -369  | 52    |
| H(20C) | 2665  | 2302 | -524  | 52    |
| H(21A) | 941   | 4616 | -1956 | 31    |
| H(22A) | 152   | 3433 | -2890 | 33    |
| H(23A) | 237   | 4856 | -3398 | 35    |
| H(24A) | -1505 | 4146 | -3272 | 38    |
| H(25A) | -550  | 5248 | -2313 | 40    |
| H(25B) | -1545 | 4880 | -2253 | 40    |
| H(26A) | -527  | 4943 | -4725 | 74    |
| H(26B) | -202  | 4273 | -5133 | 74    |
| H(26C) | 577   | 4693 | -4527 | 74    |
| H(27A) | -2865 | 4740 | -3738 | 99    |
| H(27B) | -2855 | 5509 | -4090 | 99    |
| H(27C) | -2620 | 5414 | -3211 | 99    |

|        |       |      |       |    |
|--------|-------|------|-------|----|
| H(28A) | 6966  | 2787 | 1493  | 35 |
| H(29A) | 7466  | 4151 | 2251  | 38 |
| H(29B) | 8217  | 3658 | 1888  | 38 |
| H(30A) | 6359  | 4233 | 1066  | 39 |
| H(31A) | 6729  | 3600 | 18    | 49 |
| H(31B) | 7705  | 3306 | 539   | 49 |
| H(32A) | 7373  | 4761 | 136   | 78 |
| H(32B) | 8082  | 4250 | -180  | 78 |
| H(32C) | 8343  | 4477 | 672   | 78 |
| H(33A) | 6770  | 3021 | 5537  | 36 |
| H(34A) | 6227  | 2114 | 6625  | 39 |
| H(35A) | 7708  | 3176 | 6896  | 43 |
| H(36A) | 8085  | 1689 | 6983  | 43 |
| H(37A) | 8382  | 2632 | 5838  | 47 |
| H(37B) | 8625  | 1807 | 5877  | 47 |
| H(38A) | 8345  | 3359 | 8228  | 62 |
| H(38B) | 7512  | 3182 | 8656  | 62 |
| H(38C) | 7270  | 3644 | 7915  | 62 |
| H(39A) | 9160  | 2346 | 8205  | 63 |
| H(39B) | 10220 | 2276 | 8051  | 63 |
| H(39C) | 9494  | 1620 | 7901  | 63 |
| H(40A) | 4279  | 1709 | 3779  | 59 |
| H(40B) | 3275  | 1888 | 3992  | 59 |
| H(40C) | 4193  | 1666 | 4623  | 59 |
| H(41A) | 3959  | 2819 | 5301  | 62 |
| H(41B) | 3054  | 2989 | 4636  | 62 |
| H(41C) | 3915  | 3548 | 4860  | 62 |
| H(42A) | 206   | 4009 | 2500  | 45 |
| H(43A) | -441  | 5178 | 2366  | 76 |
| H(43B) | 329   | 5406 | 1846  | 76 |
| H(44A) | 1677  | 5109 | 2820  | 60 |
| H(45A) | 311   | 4671 | 3692  | 65 |
| H(45B) | 982   | 5354 | 3892  | 65 |
| H(46A) | 1676  | 3933 | 3955  | 73 |
| H(46B) | 1700  | 4429 | 4657  | 73 |
| H(46C) | 2379  | 4602 | 4098  | 73 |
| H(11E) | 3211  | 327  | 7350  | 50 |
| H(14D) | 11617 | 3323 | 16000 | 49 |
| H(1B)  | 6490  | 451  | 10123 | 30 |
| H(3B)  | 6068  | 378  | 8790  | 30 |
| H(4B1) | 7115  | 1134 | 8349  | 39 |
| H(4B2) | 6688  | 1806 | 8692  | 39 |
| H(5B)  | 7700  | 663  | 9540  | 36 |
| H(6B1) | 6154  | 1630 | 10968 | 32 |
| H(6B2) | 5358  | 1018 | 10825 | 32 |
| H(8B)  | 7349  | 115  | 12665 | 28 |

|        |       |       |       |     |
|--------|-------|-------|-------|-----|
| H(9B1) | 6836  | 1306  | 13424 | 30  |
| H(9B2) | 7225  | 618   | 13891 | 30  |
| H(10B) | 8683  | 708   | 13464 | 28  |
| H(11C) | 8266  | 1895  | 14299 | 32  |
| H(11D) | 8727  | 1165  | 14645 | 32  |
| H(12B) | 10136 | 1367  | 14243 | 30  |
| H(14C) | 9672  | 1342  | 12921 | 29  |
| H(15C) | 8653  | 2407  | 11997 | 32  |
| H(15D) | 9809  | 2417  | 12161 | 32  |
| H(17B) | 9094  | 890   | 10415 | 36  |
| H(18C) | 8349  | 2093  | 9594  | 41  |
| H(18D) | 8759  | 1493  | 9141  | 41  |
| H(19D) | 4922  | 98    | 9589  | 55  |
| H(19E) | 4219  | 540   | 8954  | 55  |
| H(19F) | 4292  | 730   | 9806  | 55  |
| H(20D) | 4632  | 1916  | 8925  | 59  |
| H(20E) | 5660  | 2165  | 9403  | 59  |
| H(20F) | 4824  | 1938  | 9808  | 59  |
| H(21B) | 5549  | 121   | 7651  | 30  |
| H(22B) | 3994  | 999   | 6857  | 30  |
| H(23B) | 4512  | -330  | 6317  | 34  |
| H(24B) | 4934  | 990   | 5706  | 39  |
| H(25C) | 6305  | 87    | 6652  | 37  |
| H(25D) | 6572  | 800   | 6279  | 37  |
| H(26D) | 3371  | -714  | 5306  | 79  |
| H(26E) | 2354  | -314  | 5161  | 79  |
| H(26F) | 2822  | -621  | 5965  | 79  |
| H(27D) | 5396  | 779   | 4562  | 77  |
| H(27E) | 5891  | 40    | 4454  | 77  |
| H(27F) | 6403  | 565   | 5099  | 77  |
| H(28B) | 5446  | 261   | 13001 | 31  |
| H(29C) | 6854  | -901  | 13349 | 40  |
| H(29D) | 5763  | -892  | 13546 | 40  |
| H(30B) | 6149  | -753  | 12059 | 37  |
| H(31C) | 4302  | -728  | 12481 | 51  |
| H(31D) | 4605  | -1319 | 11959 | 51  |
| H(32D) | 4306  | 136   | 11552 | 106 |
| H(32E) | 3569  | -484  | 11228 | 106 |
| H(32F) | 4609  | -454  | 11030 | 106 |
| H(33B) | 11328 | 1743  | 15147 | 31  |
| H(34B) | 10653 | 2551  | 16252 | 30  |
| H(35B) | 12507 | 1873  | 16382 | 32  |
| H(36B) | 10973 | 1507  | 17095 | 38  |
| H(37C) | 11733 | 779   | 15984 | 41  |
| H(37D) | 10929 | 449   | 16370 | 41  |
| H(38D) | 13639 | 2056  | 17539 | 59  |

|        |       |      |       |    |
|--------|-------|------|-------|----|
| H(38E) | 13613 | 2868 | 17769 | 59 |
| H(38F) | 13608 | 2660 | 16932 | 59 |
| H(39D) | 12570 | 1531 | 18322 | 74 |
| H(39E) | 12524 | 700  | 18461 | 74 |
| H(39F) | 11546 | 1145 | 18216 | 74 |
| H(40D) | 8501  | 2834 | 13533 | 48 |
| H(40E) | 9272  | 3232 | 13168 | 48 |
| H(40F) | 9446  | 3177 | 14049 | 48 |
| H(41D) | 11110 | 2602 | 14052 | 52 |
| H(41E) | 10838 | 2718 | 13175 | 52 |
| H(41F) | 11125 | 1950 | 13508 | 52 |
| H(42B) | 10499 | 1894 | 10101 | 38 |
| H(43C) | 11071 | 925  | 9476  | 54 |
| H(43D) | 10188 | 410  | 9639  | 54 |
| H(44B) | 10743 | 576  | 10948 | 43 |
| H(45C) | 12242 | 1442 | 10554 | 53 |
| H(45D) | 12449 | 736  | 11036 | 53 |
| H(46D) | 11768 | 2027 | 11527 | 78 |
| H(46E) | 12816 | 1694 | 11837 | 78 |
| H(46F) | 11879 | 1317 | 12004 | 78 |
| H(1WA) | 4935  | 2678 | 7807  | 73 |
| H(1WB) | 5382  | 2052 | 7858  | 73 |

---

**Synthesis General Experimental Procedures.** All reactions were conducted in flame-dried or oven-dried glassware under an atmosphere of dry nitrogen or argon. Oxygen and/or moisture sensitive solids and liquids were transferred appropriately. Concentration of solutions *in vacuo* was accomplished using a rotary evaporator fitted with a water aspirator. Residual solvents were removed under high vacuum (0.1-0.2 mm Hg). All reaction solvents were purified before use: Diethyl ether and tetrahydrofuran were distilled from sodium benzophenone ketyl. Toluene was distilled over molten sodium metal. Dichloromethane, dimethylformamide, diethylamine, triethylamine and diisopropylethylamine were distilled from CaH<sub>2</sub>. Methanol was distilled from Mg/I<sub>2</sub>. Flash column chromatography was performed using the indicated solvents on E. Qingdao silica gel 60 (230 – 400 mesh ASTM). TLC was carried out using pre-coated sheets (Qingdao silica gel 60-F250, 0.2 mm). Compounds were visualized with UV light, iodine, *p*-anisaldehyde stain, ceric ammonium molybdate stain, or phosphomolybdic acid in EtOH. NMR spectra were recorded on Bruker DPX 300 MHz, Avance 400 MHz or AV 500 MHz spectrometers. Chemical shifts were reported in parts per million (ppm), relative to either a tetramethylsilane (TMS) internal standard or the signals due to the solvent. The following abbreviations are used to describe spin multiplicity: s = singlet, d = doublet, t = triplet, q = quartet, qn = quintet, m = multiplet, br = broad, dd = doublet of doublets, dt = doublet of triplets, dq = doublet of quartets, ddd = doublet of doublet of doublets; other combinations are derived from those listed above. AB quartet relationships are noted, but listed as a pair of doublets. Coupling constants (*J*) are reported in Hertz. <sup>13</sup>C NMR spectra were completely heterodecoupled and measured at 125, 100, or 75 MHz. Residual chloroform ( $\delta_C$  77.0 ppm) was used as internal reference for spectra measured in this solvent. Low-



and high- resolution EI and ESI mass spectra were obtained using an AB QSTAR Elite mass spectrometer. Optical rotations were recorded on a Rudolph AutoPol I Polarimeter.

### Synthesis Details.

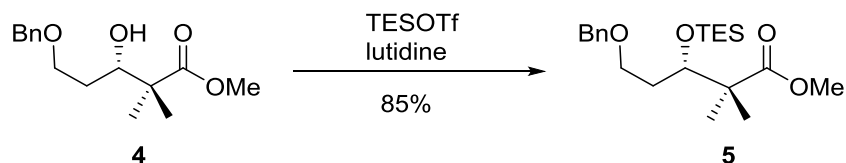

To a solution of compound **4** (354 mg, 1.3 mmol) and 2,6-lutidine (0.35 mL, 4.1 mmol) in  $\text{CH}_2\text{Cl}_2$  (10 mL), TES-triflate (0.31 mL, 1.9 mmol) was added at 0 °C. The reaction mixture was stirred for an additional hour and then quenched by the addition of a saturated aqueous solution of  $\text{NaHCO}_3$  (10 mL). The reaction mixture was extracted with EtOAc ( $2 \times 30$  mL); and the combined organic layers were washed successively with a saturated aqueous solution of  $\text{NH}_4\text{Cl}$  (10 mL), brine (10 mL), dried over anhydrous  $\text{Na}_2\text{SO}_4$ , filtered, and concentrated in *vacuo*. The residue was purified by flash column chromatography on silica gel (hexanes/ethyl ether = 95/5) to afford compound **5** (428 mg, 85%) as a colorless oil.  $[\alpha]_{\text{D}}^{20} = -10.2$  (*c* 5.0, DCM);  $^1\text{H}$  NMR (400 MHz,  $\text{CDCl}_3$ )  $\delta$  7.38 – 7.26 (m, 5H), 4.48 (t, *J* = 11.9 Hz, 2H), 4.08 (dd, *J* = 8.6, 1.9 Hz, 1H), 3.63 (s, 3H), 3.53 – 3.46 (m, 2H), 1.81 – 1.67 (m, 1H), 1.67 – 1.55 (m, 1H), 1.16 (s, 3H), 1.08 (s, 3H), 0.92 (t, *J* = 7.9 Hz, 9H), 0.55 (q, *J* = 8.0 Hz, 6H);  $^{13}\text{C}$  NMR (100 MHz,  $\text{CDCl}_3$ )  $\delta$  177.53, 138.41, 128.34, 127.71, 127.53, 74.09, 72.88, 67.65, 51.64, 48.31, 33.55, 21.14, 20.48, 6.99, 5.41; HRMS (ESI) *m/z* calcd for  $\text{C}_{21}\text{H}_{36}\text{O}_4\text{NaSi}$  [ $\text{M} + \text{Na}$ ] $^+$ : 403.2275, found: 403.2273.

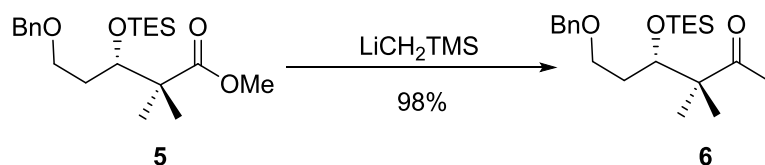

To a solution of compound **5** (5.3 g, 13.90 mmol) in pentane (100 mL), (trimethylsilyl)methylolithium (27.5 mL, 27.50 mmol, 1.0 M in pentane) was cooled at 0 °C and stirred for 5 hours. MeOH (15 mL) was added dropwise to the reaction mixture and then stirred for 2 hours. The reaction mixture was quenched with a saturated aqueous solution of  $\text{NaHCO}_3$  (30 mL) and then extracted with EtOAc ( $2 \times 60$  mL). The combined organic layers were washed successively with a saturated aqueous solution of  $\text{NH}_4\text{Cl}$  (30 mL), brine (30 mL), dried over anhydrous  $\text{Na}_2\text{SO}_4$ , filtered, and concentrated under reduced pressure. The residue was purified by flash column chromatography on silica gel (hexanes/ethyl ether = 95/5) to give rise to compound **6** (5.0 g, 98%) as a colorless oil.  $[\alpha]_{\text{D}}^{20} = -10.4$  (*c* 10.0, DCM);  $^1\text{H}$  NMR (500 MHz,  $\text{CDCl}_3$ )  $\delta$  7.39 – 7.24 (m, 5H), 4.54 – 4.44 (dd, *J* = 14.7, 11.8 Hz, 2H), 4.08 (dd, *J* = 8.5, 2.6 Hz, 1H), 3.51 (dd, *J* = 7.8, 5.4 Hz, 2H), 2.14 (s, 3H), 1.79 – 1.67 (m, 1H), 1.61 – 1.51 (m, 1H), 1.12 (s, 3H), 1.07 (s, 3H), 0.95 (t, *J* = 7.9 Hz, 9H), 0.60 (q, *J* = 7.8 Hz, 6H).  $^{13}\text{C}$  NMR (125 MHz,  $\text{CDCl}_3$ )  $\delta$  213.46, 138.52, 128.42, 127.77, 127.62, 74.25, 73.00, 67.55, 53.30, 34.21, 26.95, 21.78, 20.15, 7.11, 5.54; HRMS (ESI) *m/z* calcd for  $\text{C}_{21}\text{H}_{36}\text{NaO}_3\text{Si}$  [ $\text{M} + \text{Na}$ ] $^+$ : 387.2326, found: 387.2323.

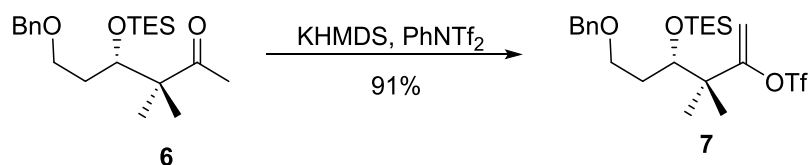

To a solution of ketone **6** (2.6 g, 7.1 mmol) in THF (35 mL) at  $-78\text{ }^\circ\text{C}$ , KHMDS (11.5 mL, 9.2 mmol, 0.8 M in THF) was added dropwise. After being stirred at  $-78\text{ }^\circ\text{C}$  for 1 hour, a solution of *N*-phenyltrifluoromethanesulfonimide (2.9 g, 8.1 mmol) in THF (10 mL) was added dropwise to the reaction mixture and stirred for additional 2 hours. The reaction mixture was quenched with a saturated aqueous solution of  $\text{NH}_4\text{Cl}$  (20 mL) and then extracted with hexanes ( $2 \times 100\text{ mL}$ ). The combined organic layers were washed successively with a saturated aqueous solution of  $\text{NaHCO}_3$  (50 mL), brine (50 mL), dried over anhydrous  $\text{Na}_2\text{SO}_4$ , filtered, and concentrated under reduced pressure. The residue was purified by flash column chromatography on silica gel (hexanes/ethyl ether = 96/4) to afford compound **7** (3.2 g, 91%) as a colorless oil.  $[\alpha]_{\text{D}}^{20} = -10.6$  (*c* 2.0, DCM);  $^1\text{H}$  NMR (400 MHz,  $\text{CDCl}_3$ )  $\delta$  7.35 – 7.25 (m, 5H), 5.13 (d, *J* = 4.3 Hz, 1H), 5.01 (d, *J* = 4.3 Hz, 1H), 4.49 (dd, *J* = 15.3, 11.9 Hz, 2H), 3.83 (dd, *J* = 8.8, 2.2 Hz, 1H), 3.56 – 3.44 (m, 2H), 1.88 (dtd, *J* = 14.1, 8.0, 2.2 Hz, 1H), 1.63 – 1.51 (m, 2H), 1.57 (s, 1H), 1.15 (s, 3H), 1.09 (s, 3H), 0.92 (t, *J* = 8.0 Hz, 9H), 0.56 (q, *J* = 7.9 Hz, 6H);  $^{13}\text{C}$  NMR (100 MHz,  $\text{CDCl}_3$ )  $\delta$  162.09, 138.34, 128.33, 127.67, 127.54, 102.59, 72.92, 72.87, 67.55, 45.33, 33.31, 22.74, 20.40, 6.98, 5.35; HRMS (ESI) *m/z* calcd for  $\text{C}_{22}\text{H}_{35}\text{F}_3\text{NaO}_5\text{SSi}$  [*M* + *Na*] $^+$ : 519.1819, found: 519.1820.

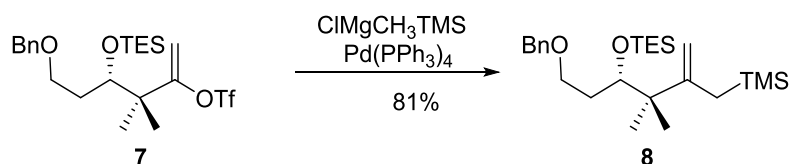

A dry flask was charged with LiCl (900 mg, 21.2 mmol) and the solid was flame-dried under reduced pressure and purged with argon.  $\text{Et}_2\text{O}$  (25 mL) was added, followed by a solution of triflate **7** (2.5 g, 5.1 mmol) in 15 mL of  $\text{Et}_2\text{O}$ . The suspension was cooled to  $0\text{ }^\circ\text{C}$  and tetrakis(triphenylphosphine)-palladium(0) (471 mg, 0.4 mmol) was added, followed by (trimethylsilyl)methylmagnesium chloride (13.0 mL, 13.0 mmol, 1.0 M in  $\text{Et}_2\text{O}$ ). After being stirred for 5 hours, the yellow suspension was filtered over a pad of a Celite, eluting with  $\text{Et}_2\text{O}$  (100 mL). The organic solution was poured over 50 mL of a saturated aqueous solution of  $\text{NaHCO}_3$  and then extracted with  $\text{Et}_2\text{O}$  ( $2 \times 50\text{ mL}$ ). The combined organic layers were washed successively with a saturated aqueous solution of  $\text{NaHCO}_3$  (50 mL), brine (50 mL), dried over anhydrous  $\text{Na}_2\text{SO}_4$ , filtered, and concentrated under reduced pressure. The residue was purified by flash column chromatography on silica gel (hexanes/ethyl ether = 99/1) to afford compound **8** (1.8 g, 81%) as a colorless oil.  $[\alpha]_{\text{D}}^{20} = -0.96$  (*c* 2.4, DCM);  $^1\text{H}$  NMR (500 MHz,  $\text{CDCl}_3$ )  $\delta$  7.40 – 7.20 (m, 5H), 4.84 (s, 1H), 4.70 (s, 1H), 4.51 (dd, *J* = 13.6, 12.1 Hz, 2H), 3.85 (dd, *J* = 8.8, 1.9 Hz, 1H), 3.58 – 3.46 (m, 2H), 1.86 (dtd, *J* = 14.3, 8.1, 2.0 Hz, 1H), 1.65 – 1.44 (m, 3H), 1.02 (s, 3H), 1.02 (s, 3H), 0.99 (t, *J* = 7.9 Hz, 9H), 0.63 (q, *J* = 7.6 Hz, 6H), 0.07 (s, 9H);  $^{13}\text{C}$  NMR (125 MHz,  $\text{CDCl}_3$ )  $\delta$  152.70, 138.83, 128.39, 127.69, 127.51, 109.21, 75.07, 72.88, 68.37, 45.16, 33.69, 25.85, 21.41, 20.50, 7.27, 5.71, -0.32; HRMS (ESI) *m/z* calcd for  $\text{C}_{25}\text{H}_{46}\text{NaO}_2\text{Si}_2$  [*M* + *Na*] $^+$ : 457.2929, found: 457.2927.



26.19, 25.72, 19.98, 16.21, 13.17; HRMS (ESI)  $m/z$  calcd for C<sub>6</sub>H<sub>9</sub>O<sub>2</sub> [M - H]<sup>-</sup>: 113.0608, found: 113.0608.

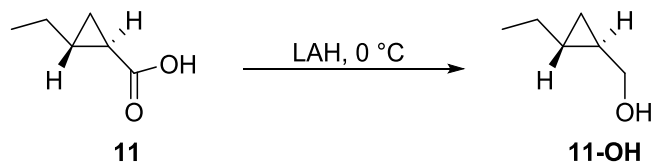

A solution of acid **11** (1.5 g, 40 mmol) in 20 mL was added dropwise to a solution of LiAlH<sub>4</sub> (3.5 g, 30 mmol) in diethyl ether (100 mL) at 0 °C. After being slowly warmed to room temperature and stirred for 2 hours, the reaction mixture was re-cooled to 0 °C and quenched by the addition of MeOH (10 mL), and followed by the addition of a saturated aqueous solution of Rochelle's salt (sodium potassium tartrate) (100 mL) and stirred for another 4 hours. The mixture was extracted with ethyl ether (2 × 100 mL), and the combined organic layers were washed successively with saturated aqueous NaHCO<sub>3</sub> (50 mL), brine (50 mL), dried over anhydrous Na<sub>2</sub>SO<sub>4</sub>, filtered, and concentrated under reduced pressure at low temperature to give a solution of alcohol **11-OH** in ethyl ether, which was directly used in the next step. <sup>1</sup>H NMR (500 MHz, CDCl<sub>3</sub>) δ 3.40 (dd,  $J$  = 7.1, 2.5 Hz, 2H), 1.64 (s, 1H), 1.27–1.19 (m, 2H), 0.92 (t,  $J$  = 7.4 Hz, 3H), 0.84–0.75 (m, 1H), 0.59–0.50 (m, 1H), 0.35–0.29 (m, 1H), 0.29–0.24 (m, 1H); <sup>13</sup>C NMR (125 MHz, CDCl<sub>3</sub>) δ = 67.25, 26.70, 21.08, 19.09, 13.74, 9.80.

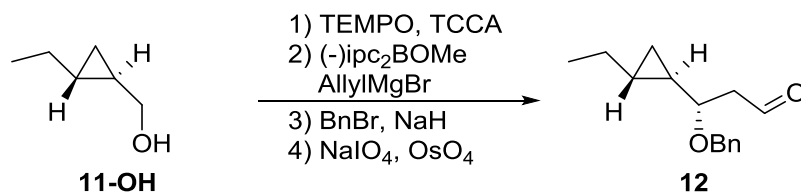

To a solution of alcohol **11-OH** (30 mmol) in ethyl ether (100 mL) was added NaHCO<sub>3</sub> (7.6 g, 90 mmol), TEMPO (468 mg, 3.0 mmol). The reaction mixture was cooled to 0 °C and TCCA (7.7 g, 33 mmol) was added. After being stirred for an additional hour at 0 °C, the reaction mixture was filtered through a pad of silica gel. The filtrate was washed successively with saturated aqueous NaHCO<sub>3</sub> (30 mL), NH<sub>4</sub>Cl (30 mL), brine (30 mL), dried over anhydrous Na<sub>2</sub>SO<sub>4</sub>, filtered, and concentrated under reduced pressure at low temperature to afford the crude aldehyde, which was used in the next step without further purification.

A solution of salt-free (-)-*B*-allyl bis(isopinocampheyl)borane (35 mmol) in Et<sub>2</sub>O (50 mL) was cooled to -82 °C. A solution of above fresh prepared aldehyde in Et<sub>2</sub>O (30 mL) was cooled to -78 °C and added via cannula over 30 min to the allylboron reagent while maintaining the reaction temperature below -80 °C. After being stirred at -82 °C for 3 hours, the reaction was slowly warmed to room temperature over 2 hours. A solution of 3 N NaOH (40 mL) and H<sub>2</sub>O<sub>2</sub> (30%, 80 mL) was added dropwise over 30 min. The mixture was stirred for 18 hours at room temperature. The product was extracted with diethyl ether (2 × 200 mL). The combined organic layers were washed successively with saturated aqueous NaHCO<sub>3</sub> (50 mL), NH<sub>4</sub>Cl (50 mL), brine (50 mL), dried over anhydrous Na<sub>2</sub>SO<sub>4</sub>, filtered, and concentrated under reduced pressure at low temperature to give rise to a crude oil consisting of the desired allylation product and isopinocampheol. The product mixture was dissolved in THF (300 mL) and cooled to 0 °C. Sodium

hydride (6.0 g, 150 mmol, 60% suspension in mineral oil) was added in portions to control the exothermic release of hydrogen. BnBr (16 mL, 135 mmol) and tetrabutylammonium iodide (3.5 g, 9.5 mmol) was then added and the mixture was gradually warmed to room temperature (the release of hydrogen was controlled by placing of the reaction vessel in an ice bath). The mixture was stirred at ambient temperature for 24 hours, then re-cooled to 0 °C and quenched by slow addition of MeOH (20 mL), followed by H<sub>2</sub>O (50 mL). The mixture was extracted with Et<sub>2</sub>O (2 × 300 mL). The combined organic layers were washed successively with saturated aqueous NH<sub>4</sub>Cl (50 mL), brine (50 mL), dried over anhydrous Na<sub>2</sub>SO<sub>4</sub>, filtered, and concentrated under reduced pressure. The residue was purified by flash column chromatography on silica gel (hexanes/ethyl ether =95/5) to afford an inseparable mixture of desired benzyl ether and isopinocampheol-benzyl ether as a light yellow oil.

To a solution of above mixture in 60 mL of H<sub>2</sub>O and 200 mL of acetone was added with 2,6-lutidine (7.0 mL, 60 mmol), osmium tetroxide (50 mL, 1 mmol, 0.02 M in *t*-BuOH) and sodium periodate (8.5 g, 40 mmol) at room temperature. After being stirred for 3 hours, the mixture was filtered, eluting with 50 mL of EtOAc and then concentrated. The slurry was then extracted with EtOAc (2 × 200 mL) and the combined organic layers were washed successively with saturated aqueous NaHCO<sub>3</sub> (50 mL), brine (50 mL), dried over anhydrous Na<sub>2</sub>SO<sub>4</sub>, filtered, and concentrated under reduced pressure. The residue was purified by flash column chromatography on silica gel (hexanes/ethyl ether = 90/15) to yield compound **12** (1.84 g, 26 % for 5 steps) as a colorless oil.  $[\alpha]_D^{20} = -34.0$  (*c* 2.0, DCM); <sup>1</sup>H NMR (500 MHz, CDCl<sub>3</sub>) δ 9.81 (t, *J* = 2.4 Hz, 1H), 7.38 – 7.24 (m, 5H), 4.79 (d, *J* = 11.6 Hz, 1H), 4.54 (d, *J* = 11.6 Hz, 1H), 3.29 (td, *J* = 8.5, 4.2 Hz, 1H), 2.77 (ddd, *J* = 15.9, 8.2, 2.8 Hz, 1H), 2.63 (ddd, *J* = 15.9, 4.1, 2.0 Hz, 1H), 1.45 – 1.33 (m, 1H), 1.33 – 1.22 (m, 1H), 1.03 (t, *J* = 7.4 Hz, 3H), 0.89 – 0.77 (m, 1H), 0.73 (ddd, *J* = 13.4, 8.9, 4.8 Hz, 1H), 0.34 – 0.21 (m, 2H). <sup>13</sup>C NMR (125 MHz, CDCl<sub>3</sub>) δ 201.61, 138.56, 128.47, 127.69, 127.67, 78.42, 70.90, 49.47, 26.71, 22.30, 21.43, 13.51, 8.03; HRMS (ESI) *m/z* calcd for C<sub>15</sub>H<sub>20</sub>O<sub>2</sub>Na [M + Na]<sup>+</sup>: 255.1356, found: 255.1355.

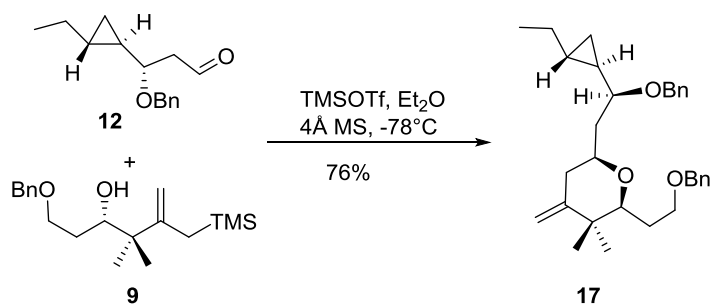

To a –78 °C ether solution of aldehyde **12** (19 mg, 82 μmol) and flame-dried powdered 4Å molecular sieves (30 mg), was added allylsilane **9** (20 mg, 62 μmol) in diethyl ether (2 mL). After being stirred for 30 min, TMSOTf (17 μL, 94 μmol) was added slowly and allowed to stir rapidly for an additional hour, then quenched with cooled saturated aqueous solution of NaHCO<sub>3</sub> (0.5 mL). The biphasic mixture was extracted with EtOAc (2 × 25 mL), and the combined organic layers were washed successively with saturated aqueous NH<sub>4</sub>Cl (10 mL), brine (10 mL), dried over anhydrous Na<sub>2</sub>SO<sub>4</sub>, filtered, and concentrated under reduced pressure. The residue was purified by flash column chromatography on silica gel (hexanes/ethyl ether =95/5) to yield compound **17** (22 mg, 76%) as a colorless oil.  $[\alpha]_D^{20} = -58.4$  (*c* 1.0, DCM); <sup>1</sup>H NMR (500 MHz, CDCl<sub>3</sub>) δ 7.37 – 7.24 (m, 10H), 4.73 (d, *J* = 11.7 Hz, 1H), 4.71 (s, 1H), 4.65 (s, 1H), 4.51 (d, *J* =

11.7 Hz, 1H), 4.47 (s, 2H), 3.59 – 3.53 (m, 1H), 3.53 – 3.46 (m, 2H), 3.12 (dd,  $J = 10.7, 1.7$  Hz, 1H), 2.90 (dt,  $J = 8.5, 6.7$  Hz, 1H), 2.24 – 2.16 (m, 1H), 2.08 – 2.00 (m, 2H), 1.85 (ddd,  $J = 9.5, 7.9, 3.9$  Hz, 1H), 1.68 (ddd,  $J = 9.1, 6.5, 2.1$  Hz, 2H), 1.44 – 1.34 (m, 1H), 1.27 – 1.18 (m, 2H), 1.06 – 0.97 (m, 9H), 0.74 – 0.66 (m, 1H), 0.63 – 0.56 (m, 1H), 0.28 – 0.20 (m, 2H);  $^{13}\text{C}$  NMR (125 MHz,  $\text{CDCl}_3$ )  $\delta$  153.97, 139.32, 138.76, 128.41, 128.38, 127.73, 127.71, 127.53, 127.43, 106.09, 81.59, 79.50, 76.10, 73.10, 70.54, 68.33, 42.37, 39.68, 39.48, 30.23, 26.90, 22.58, 22.47, 20.59, 20.14, 13.65, 8.36; HRMS (ESI)  $m/z$  calcd for  $\text{C}_{31}\text{H}_{42}\text{O}_3\text{Na}$   $[\text{M} + \text{Na}]^+$ : 485.3026, found: 485.3027.

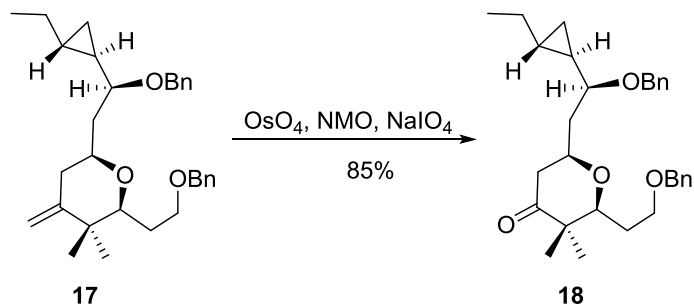

To a solution of compound **17** (193 mg, 0.42 mmol) in 6.0 mL of  $\text{H}_2\text{O}$  and 20.0 mL of acetone was added osmium tetroxide (0.5 mL, 0.05 mmol, 0.1M in *t*-BuOH) and *N*-methylmorpholine *N*-oxide (467 mg, 1.67 mmol). After being stirred for 24 hours, a solution of sodium periodate (450 mg, 2.10 mmol) in 10 mL of  $\text{H}_2\text{O}$  was added, and the yellow solution was stirred for additional 3 hours. The mixture was filtered, eluted with 50 mL of EtOAc and then concentrated. The slurry was extracted with EtOAc ( $2 \times 50$  mL) and the combined organic layers were washed successively with saturated aqueous  $\text{NaHCO}_3$  (30 mL), brine (30 mL), dried over anhydrous  $\text{Na}_2\text{SO}_4$ , filtered, and concentrated under reduced pressure. The residue was purified by flash column chromatography on silica gel (hexanes/ethyl ether = 85/15) to afford ketone **18** (164 mg, 85%) as a colorless oil.  $[\alpha]_{\text{D}}^{20} = -87.4$  ( $c$  1.0, DCM);  $^1\text{H}$  NMR (500 MHz,  $\text{CDCl}_3$ )  $\delta$  7.35 – 7.25 (m, 10H), 4.74 (d,  $J = 11.6$  Hz, 1H), 4.45 (s, 2H), 4.45 (d,  $J = 11.4$  Hz, 1H), 3.86 – 3.75 (m, 1H), 3.61 – 3.47 (m, 2H), 3.39 (dd,  $J = 8.6, 3.8$  Hz, 1H), 2.87 (dt,  $J = 8.6, 6.5$  Hz, 1H), 2.47 (dd,  $J = 14.2, 11.9$  Hz, 1H), 2.24 (dd,  $J = 14.2, 2.6$  Hz, 1H), 2.10 (dt,  $J = 13.9, 7.0$  Hz, 1H), 1.82 – 1.75 (m, 2H), 1.75 – 1.65 (m, 1H), 1.42 – 1.31 (m, 1H), 1.26 – 1.15 (m, 1H), 1.08 (s, 3H), 1.02 – 0.96 (m, 6H), 0.73 – 0.65 (m, 1H), 0.65 – 0.51 (m, 1H), 0.28 – 0.15 (m, 2H);  $^{13}\text{C}$  NMR (125 MHz,  $\text{CDCl}_3$ )  $\delta$  211.80, 139.04, 138.56, 128.46, 127.69, 127.66, 127.64, 127.56, 80.63, 79.28, 74.59, 73.12, 70.67, 67.58, 49.15, 44.70, 42.50, 29.87, 26.83, 22.35, 20.40, 19.40, 18.91, 13.62, 8.27; HRMS (ESI)  $m/z$  calcd for  $\text{C}_{30}\text{H}_{40}\text{NaO}_4$   $[\text{M} + \text{Na}]^+$ : 487.2819, found: 487.2815.

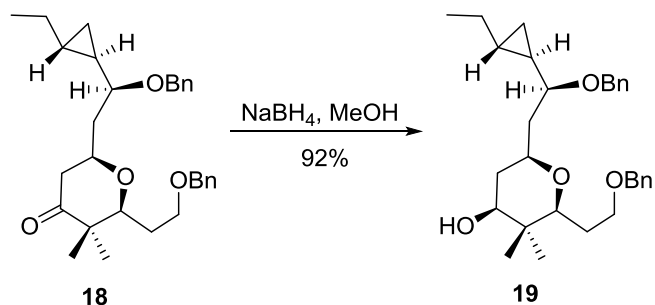

To a  $-40\text{ }^\circ\text{C}$  solution of ketone **18** (41 mg, 88  $\mu\text{mol}$ ) in MeOH (1.5 mL) was added  $\text{NaBH}_4$  (10 mg, 0.26 mmol). The reaction was stirred at this temperature for 30 min. then quenched with saturated aqueous  $\text{NH}_4\text{Cl}$  (10 mL). The biphasic mixture was extracted with EtOAc ( $2 \times 50$  mL), and the combined organic layers were washed successively with saturated aqueous  $\text{NaHCO}_3$  (15 mL), brine (15 mL), dried over anhydrous  $\text{Na}_2\text{SO}_4$ , filtered, and concentrated under reduced pressure. The residue was purified by flash column chromatography on silica gel (hexanes/EtOAc = 3/1) to yield compound **19** (39 mg, 92%) as a colorless oil.  $[\alpha]_{\text{D}}^{20} = -49.1$  ( $c$  1.0, DCM);  $^1\text{H NMR}$  (500 MHz,  $\text{CDCl}_3$ )  $\delta$  7.38 – 7.27 (m, 10H), 4.75 (d,  $J = 11.6$  Hz, 1H), 4.46 (d,  $J = 11.5$  Hz, 3H), 3.60 (dd,  $J = 11.2, 5.6$  Hz, 1H), 3.58 – 3.53 (m, 1H), 3.53 – 3.46 (m, 1H), 3.39 (dd,  $J = 11.4, 4.3$  Hz, 1H), 3.08 (d,  $J = 9.5$  Hz, 1H), 2.88 (dd,  $J = 15.2, 6.7$  Hz, 1H), 2.02 (dt,  $J = 14.1, 7.2$  Hz, 1H), 1.87 – 1.78 (m, 1H), 1.68 – 1.63 (m, 2H), 1.44 – 1.34 (m, 2H), 1.32 (d,  $J = 12.0$  Hz, 1H), 1.25 (dt,  $J = 14.0, 7.6$  Hz, 2H), 1.01 (t,  $J = 7.4$  Hz, 3H), 0.93 (s, 3H), 0.83 (s, 3H), 0.71 (dd,  $J = 12.3, 5.7$  Hz, 1H), 0.64 – 0.56 (m, 1H), 0.28 – 0.21 (m, 2H);  $^{13}\text{C NMR}$  (125 MHz,  $\text{CDCl}_3$ )  $\delta$  139.29, 138.74, 128.43, 128.39, 127.75, 127.70, 127.56, 127.46, 80.28, 79.54, 76.04, 73.08, 73.04, 70.62, 68.13, 42.04, 38.85, 37.13, 29.53, 26.90, 22.42, 20.24, 13.65, 12.55, 8.29; HRMS (ESI)  $m/z$  calcd for  $\text{C}_{30}\text{H}_{42}\text{O}_4\text{Na}$   $[\text{M} + \text{Na}]^+$ : 489.2975, found: 489.2974.

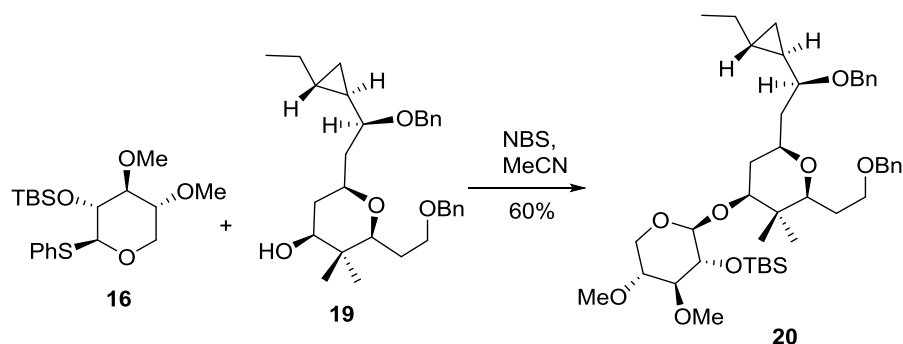

The suspended solution of compound **16** (16 mg, 42  $\mu\text{mol}$ ) and flame-dried, powdered 4Å molecular sieves (90 mg) in dry acetonitrile (1 mL) was stirred under nitrogen at room temperature for 1.5 hours. To this solution at  $-25\text{ }^\circ\text{C}$ , was added a solution of *N*-bromosuccinimide (7.5 mg, 42  $\mu\text{mol}$ ) in dry acetonitrile (0.5 mL). 10 min later a solution of alcohol **19** (10 mg, 21  $\mu\text{mol}$ ) in dry acetonitrile (0.5 mL) was added. The reaction mixture was stirred for 30 min at  $-25\text{ }^\circ\text{C}$  before it was allowed to warm to room temperature over 3 hours. The reaction was quenched with saturated aqueous  $\text{NaHCO}_3$  (10 mL). The biphasic mixture was extracted with EtOAc ( $2 \times 50$  mL), and the combined organic layers were washed successively with saturated aqueous  $\text{NH}_4\text{Cl}$  (15 mL), brine (15 mL), dried over anhydrous  $\text{Na}_2\text{SO}_4$ , filtered, and concentrated under reduced pressure to yield a crude product consisting a mixture of alpha:beta (3:5) isomers. The mixture





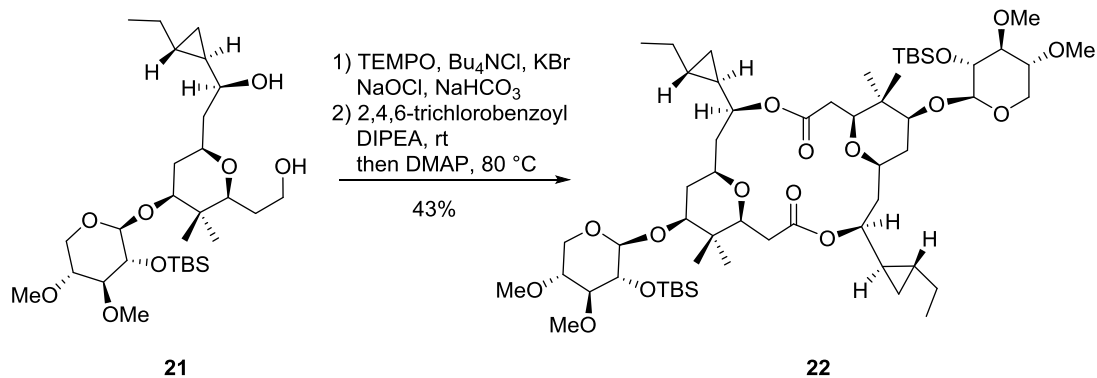

To a solution of the diol **21** (13 mg, 23  $\mu$ mol) in CH<sub>2</sub>Cl<sub>2</sub> (300  $\mu$ L) was added TEMPO (0.2 mg, 1.2  $\mu$ mol) and saturated NaHCO<sub>3</sub> (130  $\mu$ L). KBr (50  $\mu$ L, 2.5  $\mu$ mol, 0.05 M aqueous solution) and Bu<sub>4</sub>NCl (30  $\mu$ L, 1.5  $\mu$ mol, 0.05 M aqueous solution) were added subsequently and the mixture was cooled to 0 °C. To the vigorously stirring biphasic solution was added a stock solution of saturated NaHCO<sub>3</sub> (33  $\mu$ L), brine (61  $\mu$ L) and bleach (40  $\mu$ L, 0.06 mmol, 1.5 M) dropwise over 45 min. The mixture was allowed to stir for an additional 30 min at 0 °C upon completion of the addition. The solution was then diluted with H<sub>2</sub>O (2 mL) and CH<sub>2</sub>Cl<sub>2</sub> (2 mL). The diluted mixture was acidified with 10% citric acid (4-10 drops) to pH 3-4. The biphasic mixture was extracted with EtOAc (2  $\times$  50 mL), and the combined organic layers were washed with brine (15 mL), dried over anhydrous Na<sub>2</sub>SO<sub>4</sub>, filtered, and concentrated under reduced pressure to give rise to the corresponding carboxylic acid, which was employed in the next step of reaction without further purification.

To the above acid in dry toluene (2 mL) was added DIPEA (*N,N*-diisopropylethylamine) (30  $\mu$ L, 0.18 mmol) and 2,4,6-trichlorobenzoyl chloride (20  $\mu$ L, 0.13 mmol) dropwise. The reaction mixture was stirred at room temperature for 2 hours, then the mixture was added dropwise over 3 hours to a stirred solution of DMAP (4-dimethylaminopyridine) (35 mg, 0.29 mmol) in toluene (10 mL) at 80 °C, the reaction was allowed to stir for another 3 hours before it was quenched with saturated aqueous NH<sub>4</sub>Cl (15 mL). The biphasic mixture was extracted with EtOAc (2  $\times$  70 mL), and the combined organic layers were washed successively with saturated aqueous NaHCO<sub>3</sub> (15 mL), brine (15 mL), dried over anhydrous Na<sub>2</sub>SO<sub>4</sub>, filtered, and concentrated under reduced pressure. The residue was purified by flash column chromatography on silica gel (hexanes/EtOAc = 3/1) to yield compound **22** (5.5 mg, 43%) as a colorless oil.  $[\alpha]_D^{20} = -67.6$  (*c* 0.2, DCM); <sup>1</sup>H NMR (500 MHz, CD<sub>3</sub>CN)  $\delta$  4.30 (t, *J* = 8.4 Hz, 2H), 4.24 (d, *J* = 7.2 Hz, 2H), 3.90 (dd, *J* = 11.3, 5.0 Hz, 2H), 3.47 (s, 6H), 3.40 – 3.38 (m, 2H), 3.37 (s, 6H), 3.34 (dd, *J* = 11.6, 4.8 Hz, 2H), 3.28 (dd, *J* = 8.6, 7.2 Hz, 2H), 3.22 – 3.16 (m, 2H), 3.11 (dd, *J* = 11.2, 9.7 Hz, 2H), 2.95 (t, *J* = 8.5 Hz, 2H), 2.66 (s, 2H), 2.37 (dd, *J* = 17.3, 1.7 Hz, 2H), 2.08 – 2.05 (m, 2H), 1.80 (dd, *J* = 4.9, 2.5 Hz, 2H), 1.79 – 1.75 (m, 2H), 1.66 (dd, *J* = 14.5, 2.9 Hz, 2H), 1.39 – 1.32 (m, 4H), 0.93 (d, *J* = 7.6 Hz, 2H), 0.90 (s, 18H), 0.87 (s, 6H), 0.85 (t, *J* = 7.0 Hz, 6H), 0.81 (s, 6H), 0.72 (dd, *J* = 11.5, 6.9 Hz, 2H), 0.69 – 0.64 (m, 2H), 0.40 – 0.32 (m, 2H), 0.26 – 0.18 (m, 2H), 0.10 (s, 6H), 0.09 (s, 6H); <sup>13</sup>C NMR (125 MHz, CD<sub>3</sub>CN)  $\delta$  170.94, 108.71, 105.74, 89.27, 85.95, 84.05, 83.39, 81.51, 80.62, 80.27, 79.95, 77.24, 76.86, 76.60, 75.78, 74.56, 74.34, 66.23, 62.71, 61.46, 60.11, 57.62, 57.44, 56.42, 40.72, 39.14, 38.51, 38.15, 36.89, 36.08, 35.11, 27.12, 26.37, 26.27, 25.61, 24.40, 23.98, 21.95, 21.57, 20.41, 19.77, 18.81, 17.84, 14.61, 12.97, 9.29, 8.97, 8.27, -4.32, -4.63; HRMS (ESI) *m/z* calcd for C<sub>58</sub>H<sub>104</sub>NaO<sub>16</sub>Si<sub>2</sub> [M + Na]<sup>+</sup>: 1135.6755, found: 1135.6753.

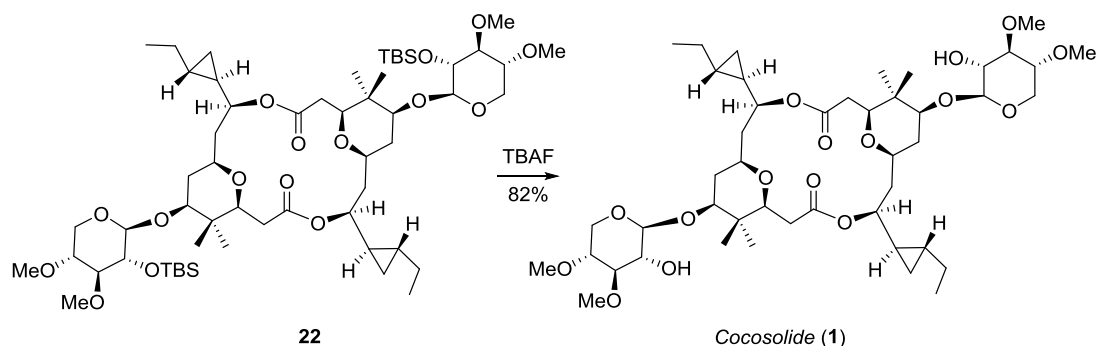

To a stirred solution of silyl ether **22** (2.0 mg, 1.8  $\mu\text{mol}$ ) in THF (1.5 mL) at 0 °C was added TBAF (300  $\mu\text{L}$ , 1 M in THF, 300  $\mu\text{mol}$ ), immediately producing a yellow solution. The mixture was stirred for 3 hours, then the reaction mixture was poured into a mixture of EtOAc (20 mL), H<sub>2</sub>O (10 mL). The layers were separated and the aqueous layer was further extracted with EtOAc (2  $\times$  20 mL). The combined organic extracts were washed successively with saturated aqueous NaHCO<sub>3</sub> (15 mL), NH<sub>4</sub>Cl (15 mL), brine (15 mL), dried over anhydrous Na<sub>2</sub>SO<sub>4</sub>, filtered, and concentrated under reduced pressure. The residue was further purified by flash column chromatography on silica gel (hexanes/EtOAc = 1/1) to yield cocosolide (**1**) (1.3 mg, 82%) as a colorless oil.  $[\alpha]_{\text{D}}^{20} = -55.5$  (*c* 0.4, DCM); <sup>1</sup>H NMR (500 MHz, CD<sub>3</sub>CN)  $\delta$  4.30 (t, *J* = 8.3 Hz, 2H), 4.23 (d, *J* = 7.3 Hz, 2H), 3.90 (dd, *J* = 11.3, 4.8 Hz, 2H), 3.50 (s, 6H), 3.40 (dd, *J* = 8.2, 1.5 Hz, 2H), 3.39 – 3.38 (m, 2H), 3.38 (s, 6H), 3.34 (dd, *J* = 11.6, 4.9 Hz, 6H), 3.32 (d, *J* = 4.7 Hz, 6H), 3.21 – 3.18 (m, 2H), 3.18 – 3.15 (m, 2H), 3.10 (dd, *J* = 11.2, 9.7 Hz, 2H), 3.02 (t, *J* = 8.5 Hz, 2H), 2.39 (dd, *J* = 17.2, 1.7 Hz, 2H), 2.07 (dd, *J* = 17.2, 8.3 Hz, 2H), 1.84 – 1.81 (m, 2H), 1.81 – 1.78 (m, 2H), 1.69 – 1.64 (m, 2H), 1.40 – 1.36 (m, 2H), 1.35 – 1.31 (m, 2H), 0.93 – 0.90 (m, 2H), 0.88 (s, 6H), 0.87 – 0.84 (m, 6H), 0.80 (s, 6H), 0.75 – 0.70 (m, 2H), 0.70 – 0.66 (m, 2H), 0.37 (dt, *J* = 8.7, 4.8 Hz, 2H), 0.24 (dt, *J* = 8.5, 5.0 Hz, 2H); <sup>13</sup>C NMR (125 MHz, CD<sub>3</sub>CN)  $\delta$  171.79, 106.37, 85.42, 85.21, 80.64, 80.00, 77.60, 76.36, 74.19, 63.36, 60.29, 58.44, 41.52, 39.26, 37.49, 35.98, 27.18, 24.73, 22.23, 20.60, 13.78, 13.48, 9.78; HRMS (ESI) *m/z* calcd for C<sub>46</sub>H<sub>76</sub>NaO<sub>16</sub> [M + Na]<sup>+</sup>: 907.5026, found: 907.5023.

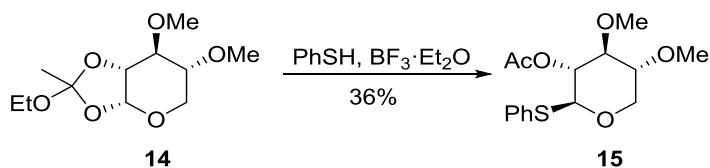

To a –45 °C solution of compound **14** (1.3g, 5.2 mmol) in CH<sub>2</sub>Cl<sub>2</sub> (50 mL) was added dropwise BF<sub>3</sub>·Et<sub>2</sub>O (980  $\mu\text{L}$ , 8 mmol), followed by the addition of PhSH (650  $\mu\text{L}$ , 6.3 mmol). The reaction mixture was allowed to stir for an additional 2 hours before it was quenched by the addition of Et<sub>3</sub>N (5 mL). The mixture was poured carefully into an Erlenmeyer flask and then partitioned between and then partitioned between H<sub>2</sub>O (50 mL) and EtOAc (150 mL). The layers were separated and the aqueous layer was extracted with EtOAc (100 mL). The combined organic layers were washed successively with saturated aqueous NaHCO<sub>3</sub> (30 mL), NH<sub>4</sub>Cl (30 mL), brine (30 mL), dried over anhydrous Na<sub>2</sub>SO<sub>4</sub>, filtered, and concentrated under reduced pressure. The residue was purified by flash column chromatography on silica gel (hexanes/EtOAc = 1/1) to yield

compound **15** (650 mg, 36%) as a colorless oil.  $[\alpha]_D^{20} = -29.9$  (*c* 1.0, DCM);  $^1\text{H NMR}$  (500 MHz,  $\text{CDCl}_3$ )  $\delta$  7.60 – 7.38 (m, 2H), 7.36 – 7.15 (m, 3H), 4.93 (t, *J* = 7.9 Hz, 1H), 4.76 (d, *J* = 8.1 Hz, 1H), 4.32 – 4.08 (m, 1H), 3.53 (s, 3H), 3.47 (s, 3H), 3.34 (ddd, *J* = 24.0, 14.0, 5.7 Hz, 3H), 2.14 (s, 3H);  $^{13}\text{C NMR}$  (125 MHz,  $\text{CDCl}_3$ )  $\delta$  169.72, 133.78, 131.96, 129.01, 127.71, 86.75, 82.61, 78.30, 71.03, 65.69, 59.92, 58.61, 21.15; HRMS (ESI) *m/z* calcd for  $\text{C}_{15}\text{H}_{20}\text{NaO}_5\text{S}$   $[\text{M} + \text{Na}]^+$ : 335.0924, found: 335.0922.

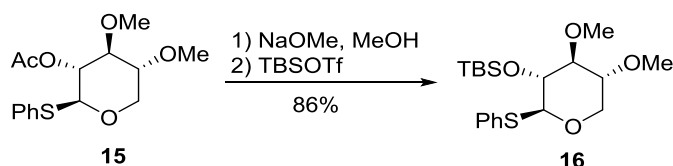

To a solution of compound **15** (142 mg, 0.45 mmol) in MeOH (5 mL) was added a catalytic amount of sodium methoxide at room temperature. The reaction mixture was stirred for an hour, before it was concentrated under reduced pressure. The residue was dissolved in dry  $\text{CH}_2\text{Cl}_2$  (15 mL). To this solution at  $0^\circ\text{C}$  was added 2,6-lutidine (0.18 mL, 1.5 mmol), followed by the addition of TBS-triflate (0.22 mL, 1.0 mmol). After being stirred for an additional hour, the reaction was quenched with saturated aqueous  $\text{NaHCO}_3$  (10 mL), and the biphasic mixture was extracted with EtOAc ( $2 \times 30$  mL). The combined organic layers were washed successively with saturated aqueous  $\text{NH}_4\text{Cl}$  (10 mL), brine (10 mL), dried over anhydrous  $\text{Na}_2\text{SO}_4$ , filtered, and concentrated under reduced pressure. The residue was purified by flash column chromatography on silica gel (hexanes/ethyl ether = 95/5) to yield compound **16** (150 mg, 86%) as a colorless oil.  $[\alpha]_D^{20} = -42.7$  (*c* 1.0, DCM);  $^1\text{H NMR}$  (400 MHz,  $\text{CDCl}_3$ )  $\delta$  7.56 – 7.38 (m, 2H), 7.36 – 7.15 (m, 3H), 4.57 (d, *J* = 9.1 Hz, 1H), 4.13 – 4.04 (m, 1H), 3.58 (s, 2H), 3.51 – 3.47 (m, 1H), 3.45 (d, *J* = 6.3 Hz, 3H), 3.35 – 3.28 (m, 1H), 3.17 (dd, *J* = 11.4, 9.9 Hz, 1H), 3.08 (t, *J* = 8.4 Hz, 1H), 0.95 (s, 9H), 0.19 (s, 3H), 0.14 (d, *J* = 6.9 Hz, 3H);  $^{13}\text{C NMR}$  (100 MHz,  $\text{CDCl}_3$ )  $\delta$  134.77, 131.24, 128.87, 127.16, 90.38, 87.12, 80.30, 73.20, 66.55, 60.93, 58.27, 26.10, 18.31, -3.89, -4.34; HRMS (ESI) *m/z* calcd for  $\text{C}_{19}\text{H}_{32}\text{NaO}_2\text{Si}$   $[\text{M} + \text{Na}]^+$ : 407.1683, found: 407.1684.

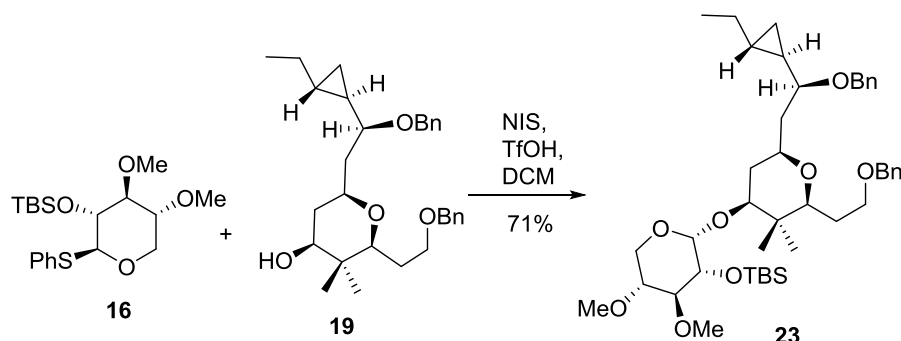

The suspended solution of compound **16** (12 mg, 31  $\mu\text{mol}$ ) and flame-dried powdered 4Å molecular sieves (60 mg) in dry dichloromethane (1 mL) was stirred under nitrogen at room temperature for an hour and then cooled to  $-78^\circ\text{C}$ . To this solution at  $-78^\circ\text{C}$ , was added a solution of *N*-iodosuccinimide (7 mg, 31  $\mu\text{mol}$ ) in dry dichloromethane (0.5 mL), followed by the addition



80.48, 75.91, 73.16, 61.72, 61.28, 60.35, 58.95, 42.93, 38.54, 32.81, 29.77, 26.79, 25.89, 25.58, 23.22, 18.89, 18.09, 13.72, 13.46, 9.34, -4.56, -4.62; HRMS (ESI)  $m/z$  calcd for  $C_{29}H_{56}NaO_8Si$  [ $M + Na$ ] $^+$ : 583.3637, found: 583.3534.

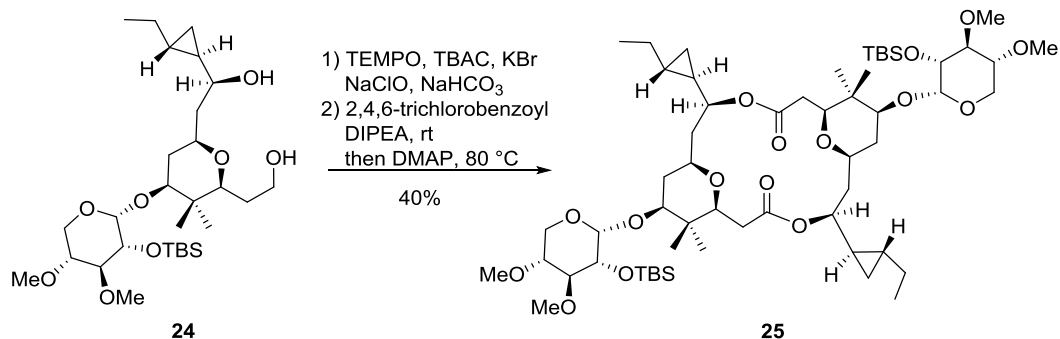

To a solution of the diol **24** (35 mg, 62  $\mu$ mol) in CH<sub>2</sub>Cl<sub>2</sub> (0.7 mL) was added TEMPO (0.5 mg, 3.2  $\mu$ mol) and saturated NaHCO<sub>3</sub> (380  $\mu$ L). KBr (125  $\mu$ L, 6.2  $\mu$ mol, 0.05 M aqueous solution) and Bu<sub>4</sub>NCl (100  $\mu$ L, 5.0  $\mu$ mol, 0.05 M aqueous solution) were added subsequently and the mixture was cooled to 0 °C. To the vigorously stirring biphasic solution was added a stock solution of saturated NaHCO<sub>3</sub> (90  $\mu$ L), brine (165  $\mu$ L) and bleach (108  $\mu$ L, 0.16 mmol, 1.5 M) dropwise over 70 min. The mixture was allowed to stir for an additional 30 min at 0 °C upon completion of the addition. The solution was then diluted with H<sub>2</sub>O (2 mL) and CH<sub>2</sub>Cl<sub>2</sub> (2 mL). The diluted mixture was acidified with 10% citric acid (4-10 drops) to pH 3-4. The biphasic mixture was extracted with EtOAc (2  $\times$  50 mL), and the combined organic layers were washed with brine (15 mL), dried over anhydrous Na<sub>2</sub>SO<sub>4</sub>, filtered, and concentrated under reduced pressure to give rise to the corresponding carboxylic acid (22 mg, 38  $\mu$ mol), which was employed in the next step of reaction without further purification.

To the above acid (4 mg, 7  $\mu$ mol) in dry toluene (2 mL) was added DIPEA (*N,N*-diisopropylethylamine) (15  $\mu$ L, 90  $\mu$ mol) and 2,4,6-trichlorobenzoyl chloride (10  $\mu$ L, 64  $\mu$ mol) dropwise. The reaction mixture was stirred at room temperature for 2 hours, then the mixture was added dropwise over 3 hours to a stirred solution of DMAP (4-dimethylaminopyridine) (17 mg, 0.14 mmol) in toluene (10 mL) at 80 °C, the reaction was allowed to stir for another 3 hours before it was quenched with saturated aqueous NH<sub>4</sub>Cl (15 mL). The biphasic mixture was extracted with EtOAc (2  $\times$  70 mL), and the combined organic layers were washed successively with saturated aqueous NaHCO<sub>3</sub> (15 mL), brine (15 mL), dried over anhydrous Na<sub>2</sub>SO<sub>4</sub>, filtered, and concentrated under reduced pressure. The residue was purified by flash column chromatography on silica gel (hexanes/EtOAc = 3/1) to yield compound **25** (2.5 mg, 40%) as a colorless oil.  $[\alpha]_D^{20} = 29.4$  (*c* 1.0, DCM); <sup>1</sup>H NMR (500 MHz, CD<sub>3</sub>CN)  $\delta$  4.74 (d, *J* = 3.7 Hz, 2H), 4.26 (t, *J* = 8.5 Hz, 2H), 3.66 (dd, *J* = 11.0, 5.3 Hz, 2H), 3.49 (d, *J* = 4.6 Hz, 6H), 3.51 – 3.46 (m, 2H), 3.46 – 3.41 (m, 2H), 3.39 (s, 6H), 3.38 (d, *J* = 7.5 Hz, 4H), 3.33 – 3.27 (m, 2H), 3.21 – 3.10 (m, 4H), 2.40 (dd, *J* = 16.2, 1.4 Hz, 2H), 2.09 (s, 2H), 1.95 – 1.85 (m, 4H), 1.68 (dd, *J* = 13.6, 5.3 Hz, 2H), 1.34 (dt, *J* = 20.0, 6.5 Hz, 2H), 1.20 – 1.12 (m, 2H), 1.00 – 0.93 (m, 2H), 0.91 (s, 6H), 0.90 (s, 18H), 0.87 (t, *J* = 7.2 Hz, 6H), 0.84 (s, 6H), 0.78 – 0.73 (m, 2H), 0.71 (dd, *J* = 11.2, 6.1 Hz, 2H), 0.40 – 0.30 (m, 2H), 0.30 – 0.22 (m, 2H), 0.08 (s, 6H), 0.05 (s, 6H); <sup>13</sup>C NMR (125 MHz, CD<sub>3</sub>CN)  $\delta$  171.36, 95.16, 83.25, 80.42, 80.29, 78.55, 76.44, 74.84, 73.04, 60.46, 60.04, 57.98, 41.18, 38.03, 35.41, 32.83, 26.36, 25.42,

23.68, 22.26, 19.85, 17.81, 12.98, 12.76, 9.06, -5.26, -5.34; HRMS (ESI)  $m/z$  calcd for  $C_{58}H_{104}NaO_{16}Si_2$   $[M + Na]^+$ : 1135.6755, found: 1135.6753.

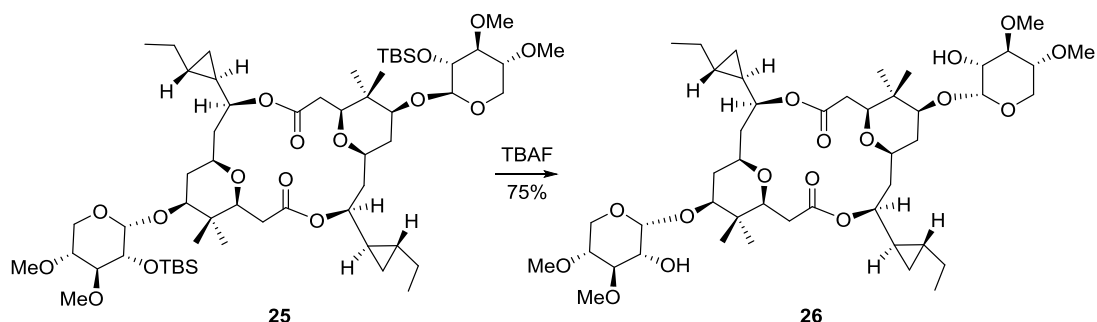

To a stirred solution of silyl ether **25** (2.0 mg, 1.8  $\mu$ mol) in THF (1 mL) at 0 °C was added TBAF (200  $\mu$ L, 1 M in THF, 200  $\mu$ mol), immediately producing a yellow solution. The mixture was stirred for 3 hours, then the reaction mixture was poured into a mixture of EtOAc (20 mL), H<sub>2</sub>O (10 mL). The layers were separated and the aqueous layer was further extracted with EtOAc (2  $\times$  20 mL). The combined organic extracts were washed successively with saturated aqueous NaHCO<sub>3</sub> (15 mL), NH<sub>4</sub>Cl (15 mL), brine (15 mL), dried over anhydrous Na<sub>2</sub>SO<sub>4</sub>, filtered, and concentrated under reduced pressure. The residue was further purified by flash column chromatography on silica gel (hexanes/EtOAc = 1/1) to yield compound **26** (1.2 mg, 75%) as a colorless oil.  $[\alpha]_D^{20} = 18.0$  ( $c$  1.0, DCM); <sup>1</sup>H NMR (500 MHz, CD<sub>3</sub>CN)  $\delta$  4.81 (d,  $J = 3.8$  Hz, 2H), 4.32 (t,  $J = 8.1$  Hz, 2H), 3.69 (dd,  $J = 11.0, 4.9$  Hz, 2H), 3.54 (s, 6H), 3.50 – 3.42 (m, 6H), 3.41 (s, 6H), 3.39 – 3.32 (m, 4H), 3.24 – 3.12 (m, 4H), 2.70 (d,  $J = 9.0$  Hz, 2H), 2.70 (br, 2H), 2.44 (dd,  $J = 16.8, 1.5$  Hz, 2H), 1.92 – 1.84 (m, 4H), 1.73 (dd,  $J = 14.8, 3.1$  Hz, 2H), 1.38 (dd,  $J = 14.9, 7.6$  Hz, 4H), 1.00 – 0.94 (m, 2H), 0.93 (s, 6H), 0.91 – 0.85 (m, 12H), 0.75 (dd,  $J = 10.7, 7.9$  Hz, 4H), 0.44 – 0.34 (m, 2H), 0.27 (dd,  $J = 13.5, 4.9$  Hz, 2H); <sup>13</sup>C NMR (125 MHz, CD<sub>3</sub>CN)  $\delta$  171.12, 95.36, 83.23, 80.15, 79.38, 79.34, 76.64, 75.25, 72.00, 60.21, 59.71, 57.87, 40.88, 37.89, 35.33, 32.80, 29.43, 26.38, 23.84, 22.23, 19.80, 12.98, 12.84, 9.01; HRMS (ESI)  $m/z$  calcd for  $C_{46}H_{76}NaO_{16}$   $[M + Na]^+$ : 907.5026, found: 907.5023.

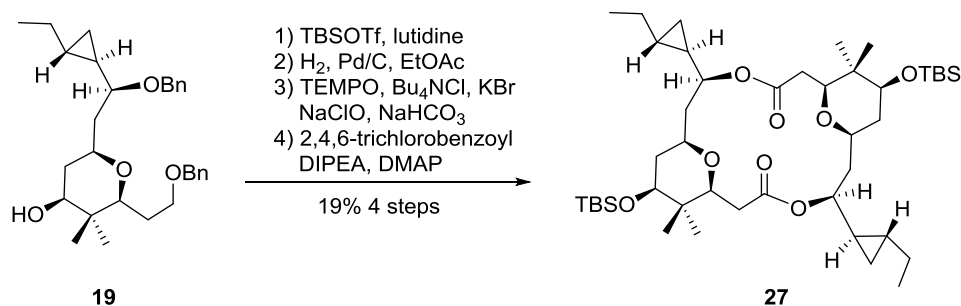

To a solution of compound **19** (37 mg, 0.08 mmol) and 2,6-lutidine (0.30 mL, 0.24 mmol) in CH<sub>2</sub>Cl<sub>2</sub> (1.5 mL), TBS-triflate (0.26 mL, 0.12 mmol) was added at 0 °C. The reaction mixture was stirred for one hour and then quenched by the addition of a saturated aqueous solution of NaHCO<sub>3</sub> (10 mL). The reaction mixture was extracted with EtOAc (2  $\times$  30 mL); and the combined organic layers were washed successively with saturated aqueous solution of NH<sub>4</sub>Cl (10 mL), brine (10 mL),

dried over anhydrous Na<sub>2</sub>SO<sub>4</sub>, filtered, and concentrated under reduced pressure. The residue was purified by flash chromatography on silica gel (hexanes/ethyl ether = 85/15) to afford the corresponding TBS silyl ether (25 mg, 54%) as a light yellow oil.

To a solution of TBS silyl ether (25 mg, 0.043 mmol) in EtOAc (1 mL) was added 10% Pd/C (5 mg). The reaction flask was evacuated and purged with hydrogen three times. The reaction mixture was stirred under H<sub>2</sub> atmosphere at ambient temperature for 2 hours. The flask was then evacuated and purged with nitrogen three times and the catalyst was removed by filtration through a pad of Celite. The filtrate was concentrated and the crude product was purified by flash column chromatography on silica gel (hexanes/EtOAc = 3/1) to yield the corresponding diol (17 mg, 99%) as a colorless oil.

To a solution of the diol (17 mg, 0.043 μmol) in CH<sub>2</sub>Cl<sub>2</sub> (300 μL) was added TEMPO (0.3 mg, 2 μmol) and saturated NaHCO<sub>3</sub> (115 μL). KBr (10 μL, 5 μmol, 0.05 M aqueous solution) and Bu<sub>4</sub>NCl (40 μL, 3.2 μmol, 0.08 M aqueous solution) were added subsequently and the mixture was cooled to 0 °C. To the vigorously stirring biphasic solution was added a stock solution of saturated NaHCO<sub>3</sub> (31 μL), brine (60 μL) and bleach (85 μL, 0.136 mmol, 1.6 M) dropwise over 60 min. The mixture was allowed to stir for an additional 30 min at 0 °C upon completion of the addition. The solution was then diluted with H<sub>2</sub>O (2 mL) and CH<sub>2</sub>Cl<sub>2</sub> (2 mL). The diluted mixture was acidified with 10% citric acid (4-10 drops) to pH 3-4. The biphasic mixture was extracted with EtOAc (2 × 30 mL), and the combined organic layers were washed with brine (15 mL), dried over anhydrous Na<sub>2</sub>SO<sub>4</sub>, filtered, and concentrated under reduced pressure to give rise to the corresponding carboxylic acid, which was employed in the next step of reaction without further purification.

To the above acid (8 mg, 0.02 mmol) in dry dichloromethane (0.6 mL) was added DIPEA (*N,N*-diisopropylethylamine) (40 μL, 0.24 mmol) and 2,4,6-trichlorobenzoyl chloride (20 μL, 0.13 mmol) dropwise. The reaction mixture was stirred at room temperature for 2 hours, then the mixture was added dropwise over 3 hours to a stirred solution of DMAP (4-dimethylaminopyridine) (35 mg, 0.29 mmol) in dry dichloromethane (8 mL) at room temperature, the reaction was allowed to stir for another 10 hours before it was quenched with saturated aqueous NH<sub>4</sub>Cl (15 mL). The biphasic mixture was extracted with EtOAc (2 × 40 mL), and the combined organic layers were washed successively with saturated aqueous NaHCO<sub>3</sub> (15 mL), brine (15 mL), dried over anhydrous Na<sub>2</sub>SO<sub>4</sub>, filtered, and concentrated under reduced pressure. The residue was purified by flash column chromatography on silica gel (hexanes/EtOAc = 3/1) to yield compound **27** (2.8 mg, 36%) as a colorless oil.  $[\alpha]_D^{20} = -14.7$  (*c* 0.4, DCM); <sup>1</sup>H NMR (400 MHz, CDCl<sub>3</sub>) δ 4.43 (t, *J* = 9.2 Hz, 2H), 3.44 (d, *J* = 6.5 Hz, 4H), 3.39 (dd, *J* = 11.3, 4.9 Hz, 2H), 2.40 (dd, *J* = 17.4, 1.6 Hz, 1H), 2.24 (dd, *J* = 17.4, 8.2 Hz, 2H), 1.95 – 1.84 (m, 2H), 1.69 (dd, *J* = 14.9, 3.5 Hz, 2H), 1.55 (d, *J* = 5.0 Hz, 2H), 1.43 – 1.33 (m, 4H), 1.33 – 1.27 (m, 2H), 0.91 – 0.88 (m, 18H), 0.86 (s, 6H), 0.80 (s, 6H), 0.79 (s, 6H), 0.67 (ddd, *J* = 13.4, 9.0, 4.7 Hz, 2H), 0.41 – 0.31 (m, 2H), 0.26 (dt, *J* = 9.7, 4.8 Hz, 2H), 0.04 (s, 6H), 0.00 (s, 6H); <sup>13</sup>C NMR (100 MHz, CDCl<sub>3</sub>) δ 171.3, 79.6, 77.2, 75.7, 75.6, 41.0, 38.8, 38.1, 35.3, 29.7, 26.6, 25.8, 24.3, 22.7, 19.8, 18.0, 13.5, 12.9, 9.6, -3.9, -5.0; HRMS (ESI) *m/z* calcd for C<sub>44</sub>H<sub>81</sub>O<sub>8</sub>Si<sub>2</sub> [M + H]<sup>+</sup>: 793.5464, found: 793.5502.

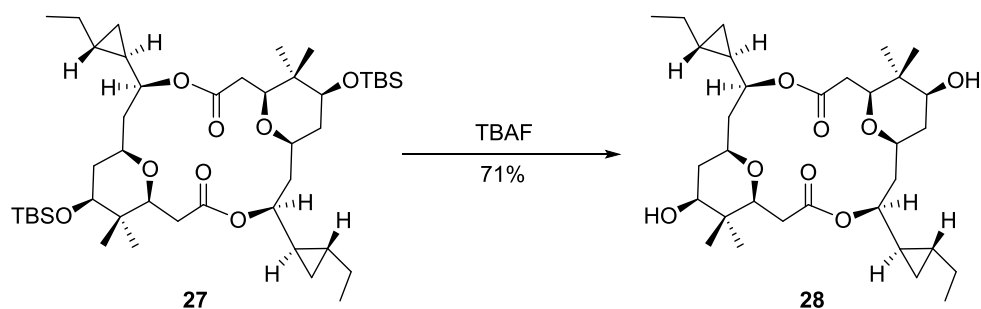

To a stirred solution of silyl ether **27** (2.0 mg, 2.5  $\mu\text{mol}$ ) in THF (1 mL) at 0 °C was added TBAF (1 mL, 0.5 mmol, 0.5 M in THF). The reaction mixture was stirred at room temperature for 28 hours, then it was poured into a biphasic mixture solution of EtOAc (20 mL) and H<sub>2</sub>O (10 mL). The layers were separated and the aqueous layer was extracted with EtOAc (2  $\times$  20 mL). The combined organic extracts were washed successively with saturated aqueous NaHCO<sub>3</sub> (15 mL), NH<sub>4</sub>Cl (15 mL), brine (15 mL), dried over anhydrous Na<sub>2</sub>SO<sub>4</sub>, and concentrated under reduced pressure. The residue was purified by flash column chromatography on silica gel (hexanes/EtOAc = 2/1) to yield compound **28** (1.0 mg, 71%) as a colorless oil.  $[\alpha]_{\text{D}}^{20} = 5.0$  (*c* 0.4, DCM); <sup>1</sup>H NMR (300 MHz, CDCl<sub>3</sub>)  $\delta$  4.41 (t, *J* = 9.1 Hz, 2H), 3.52 – 3.37 (m, 6H), 2.45 – 2.24 (m, 4H), 2.02 – 1.88 (m, 2H), 1.83 – 1.69 (m, 4H), 1.41 – 1.30 (m, 4H), 1.00 – 0.93 (m, 2H), 0.90 (s, 6H), 0.87 (d, *J* = 6.4 Hz, 6H), 0.82 (s, 6H), 0.74 – 0.63 (m, 2H), 0.40 – 0.31 (m, 2H), 0.31 – 0.22 (m, 2H); <sup>13</sup>C NMR (100 MHz, CDCl<sub>3</sub>)  $\delta$  171.3, 79.9, 77.2, 75.5, 75.3, 41.1, 38.4, 35.1, 26.6, 24.2, 22.2, 19.9, 13.5, 12.5, 9.6; HRMS (ESI) *m/z* calcd for C<sub>32</sub>H<sub>53</sub>O<sub>8</sub> [M + H]<sup>+</sup>: 565.3735, found: 565.3732.



$^1\text{H}$  NMR Spectrum of Natural Cocosolide (**1**) (from Cocos Lagoon) in  $\text{CD}_3\text{CN}$  (600 MHz)

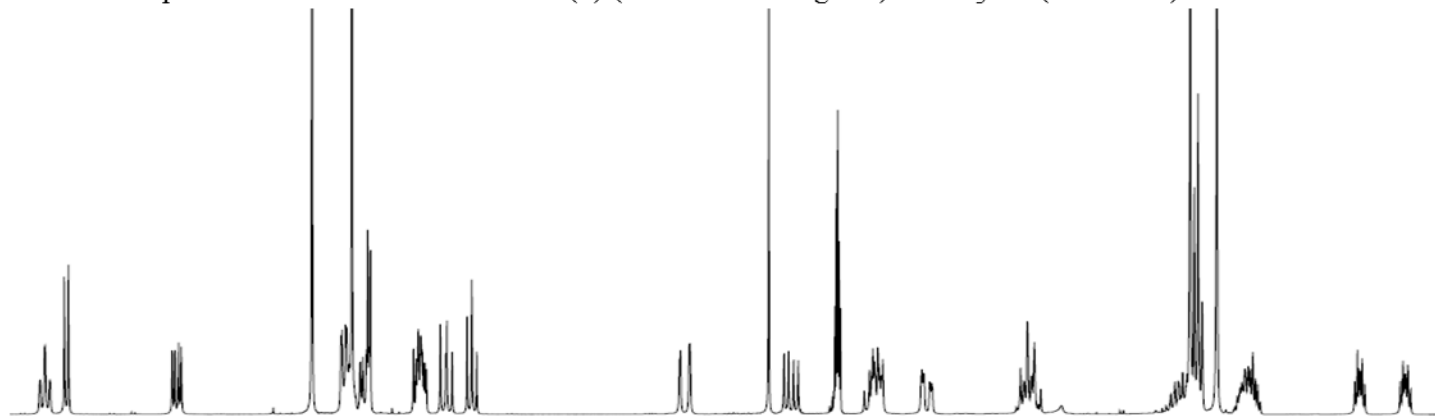

$^1\text{H}$  NMR Spectrum of Synthetic Cocosolide (**1**) in  $\text{CD}_3\text{CN}$  (500 MHz)

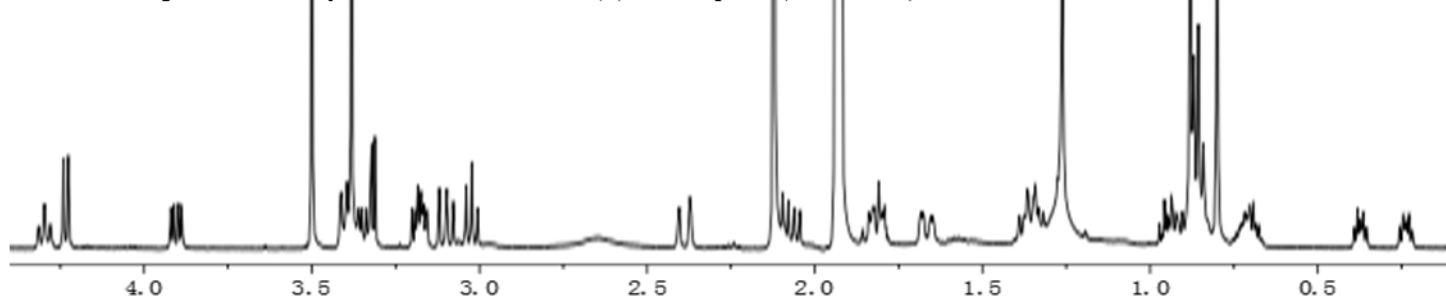

**Figure S3.** Comparison of  $^1\text{H}$  spectrum of natural cocosolide (**1**) (from Cocos Lagoon) and the synthetic cocosolide (**1**).

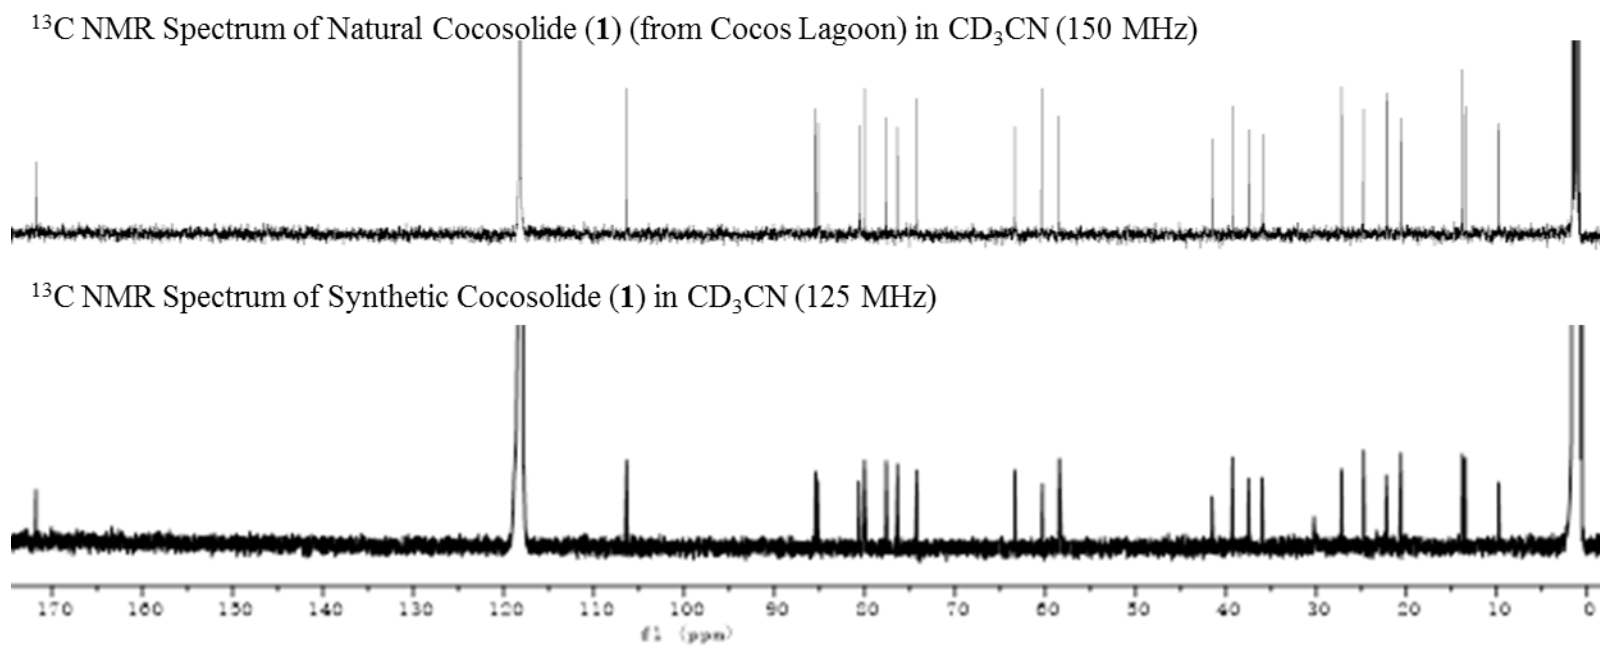

**Figure S4.** Comparison of  $^{13}\text{C}$  spectrum of natural cocosolide (**1**) (from Cocos Lagoon) and the synthetic cocosolide (**1**).

400M, CDC13

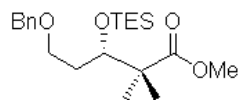

**5**

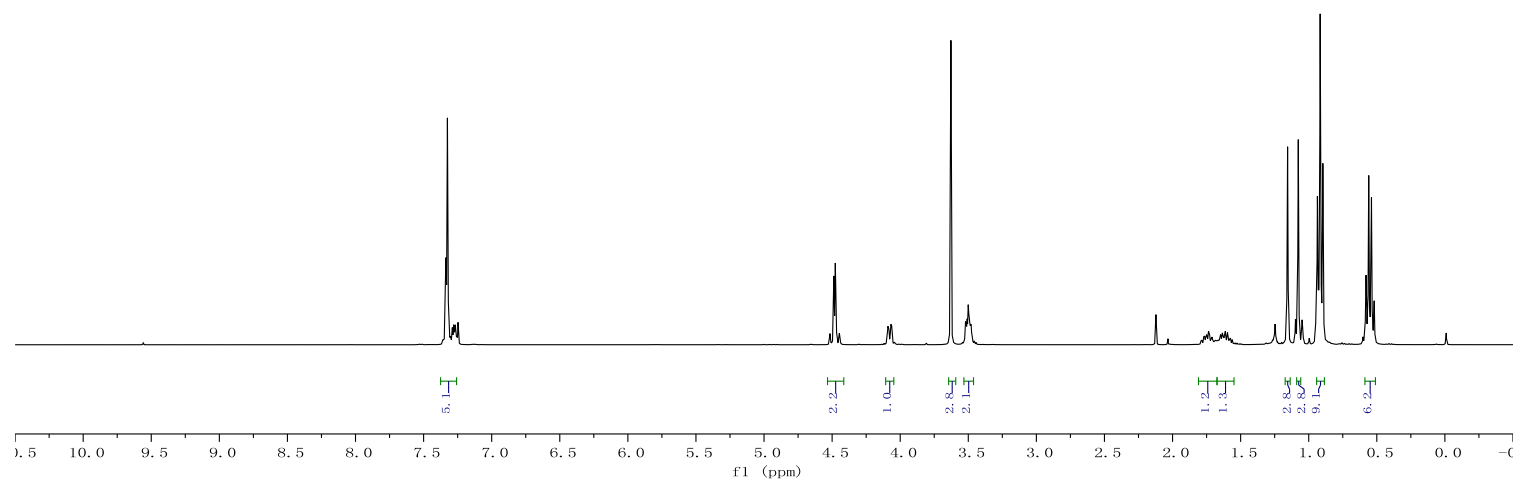

100M, CDCl<sub>3</sub>

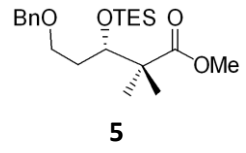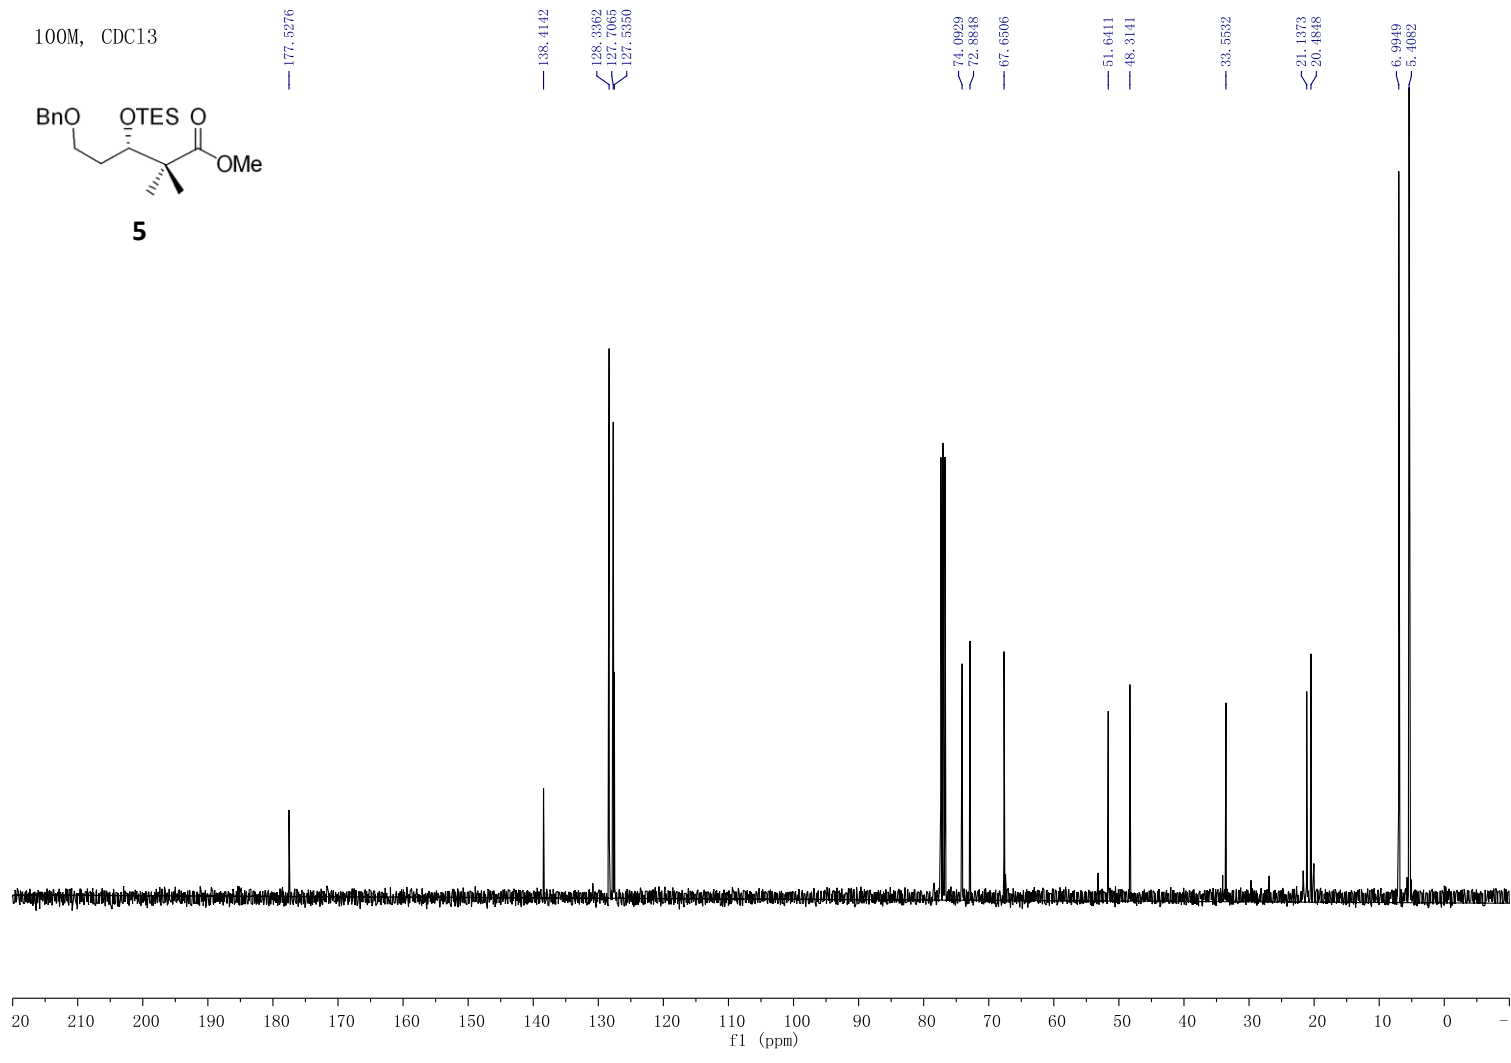

500M, CDCl<sub>3</sub>

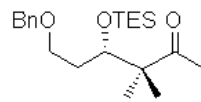

**6**

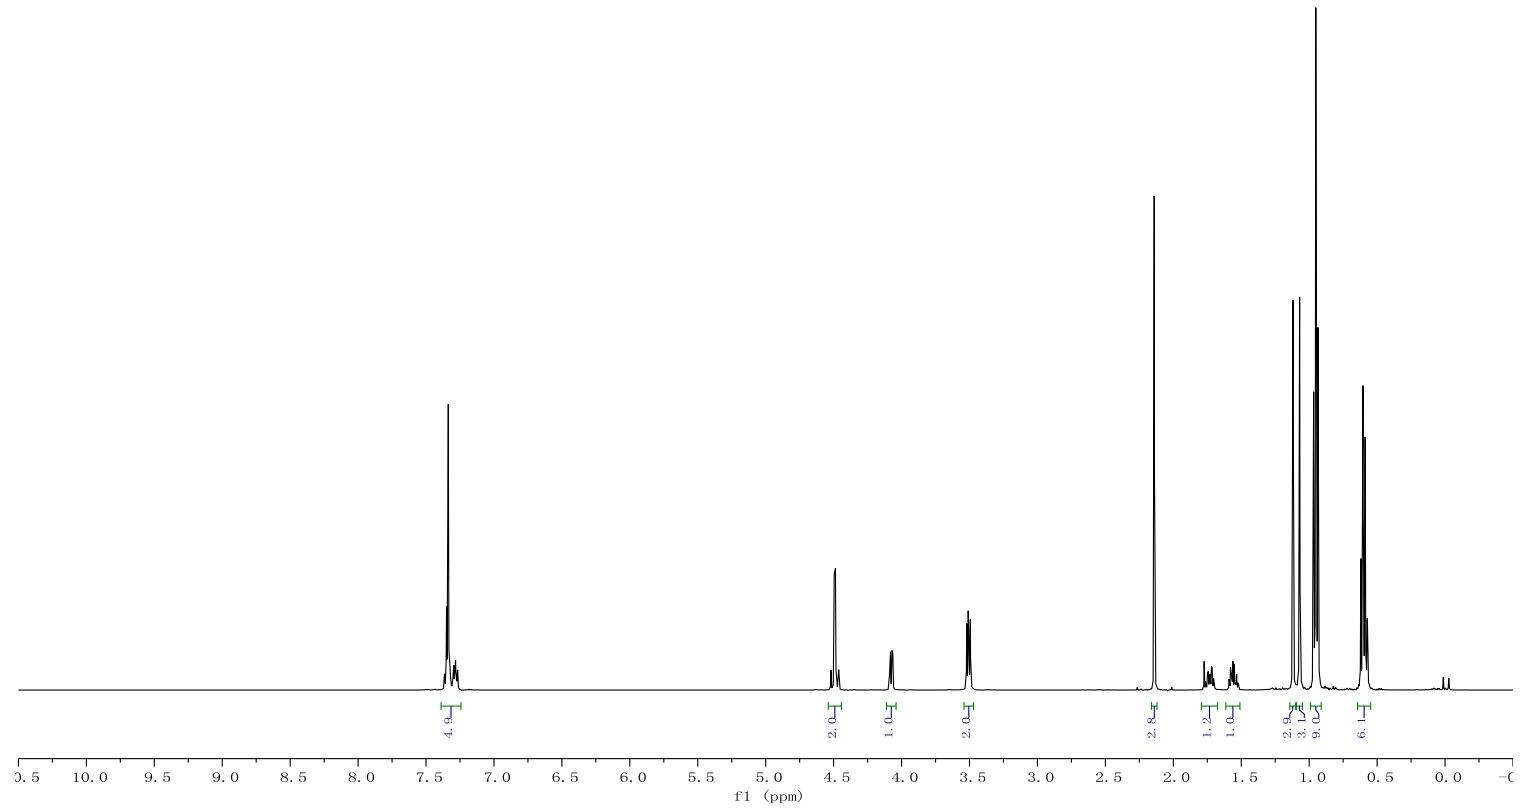

213.46  
125M, CDC13

138.52  
128.42  
127.62  
127.62

74.25  
73.00  
67.55

53.30

34.21  
26.95  
21.78  
20.15

7.11  
5.54

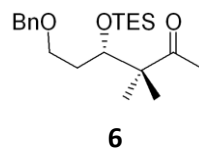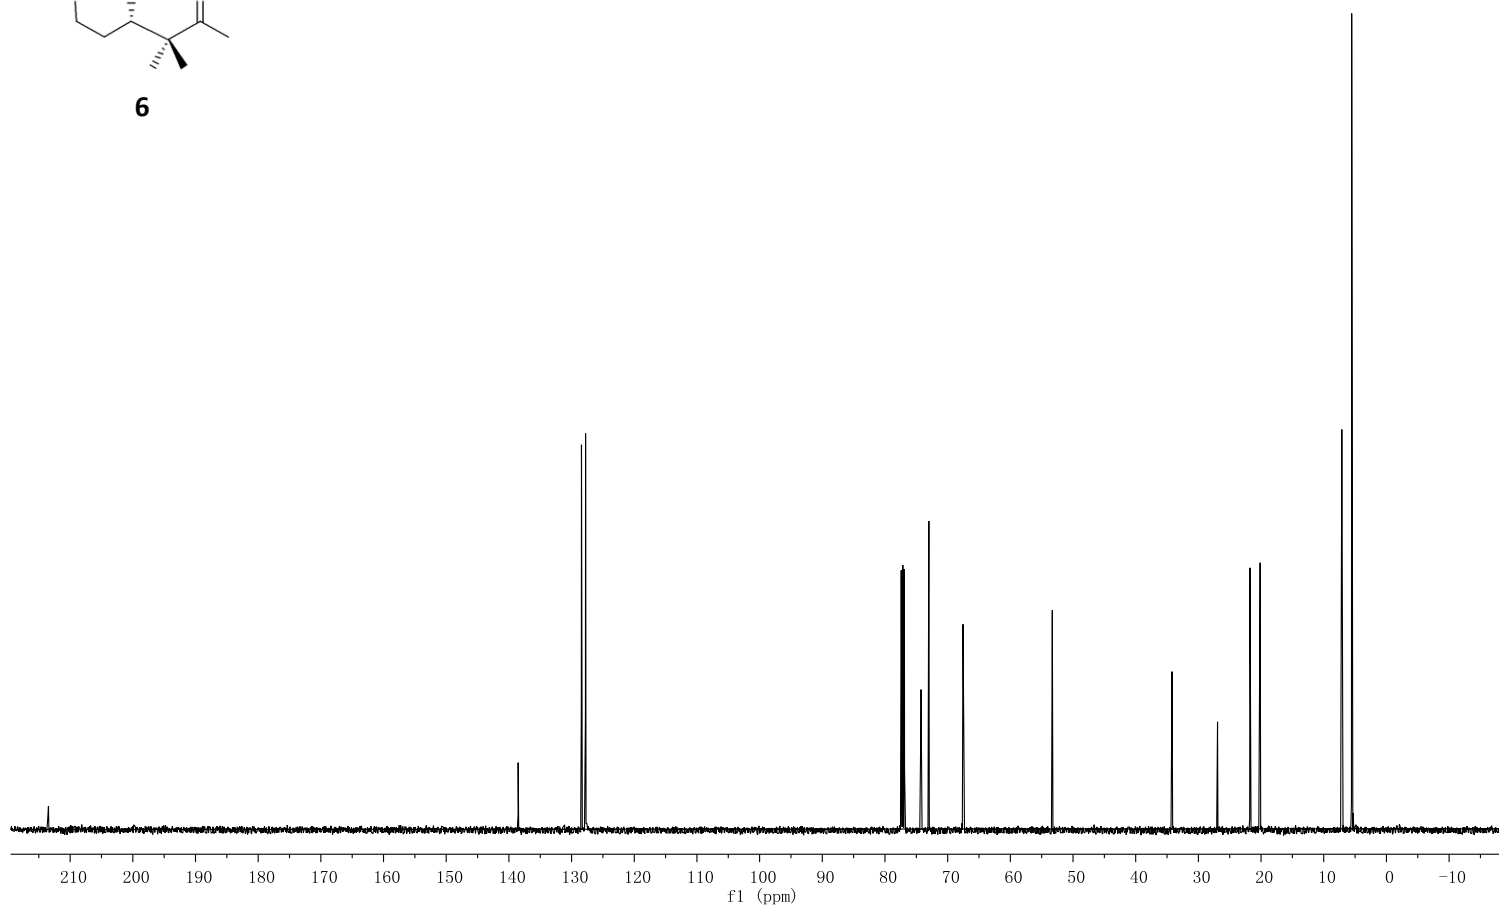

400M, CDCl3

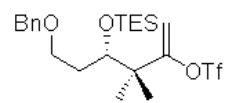

**7**

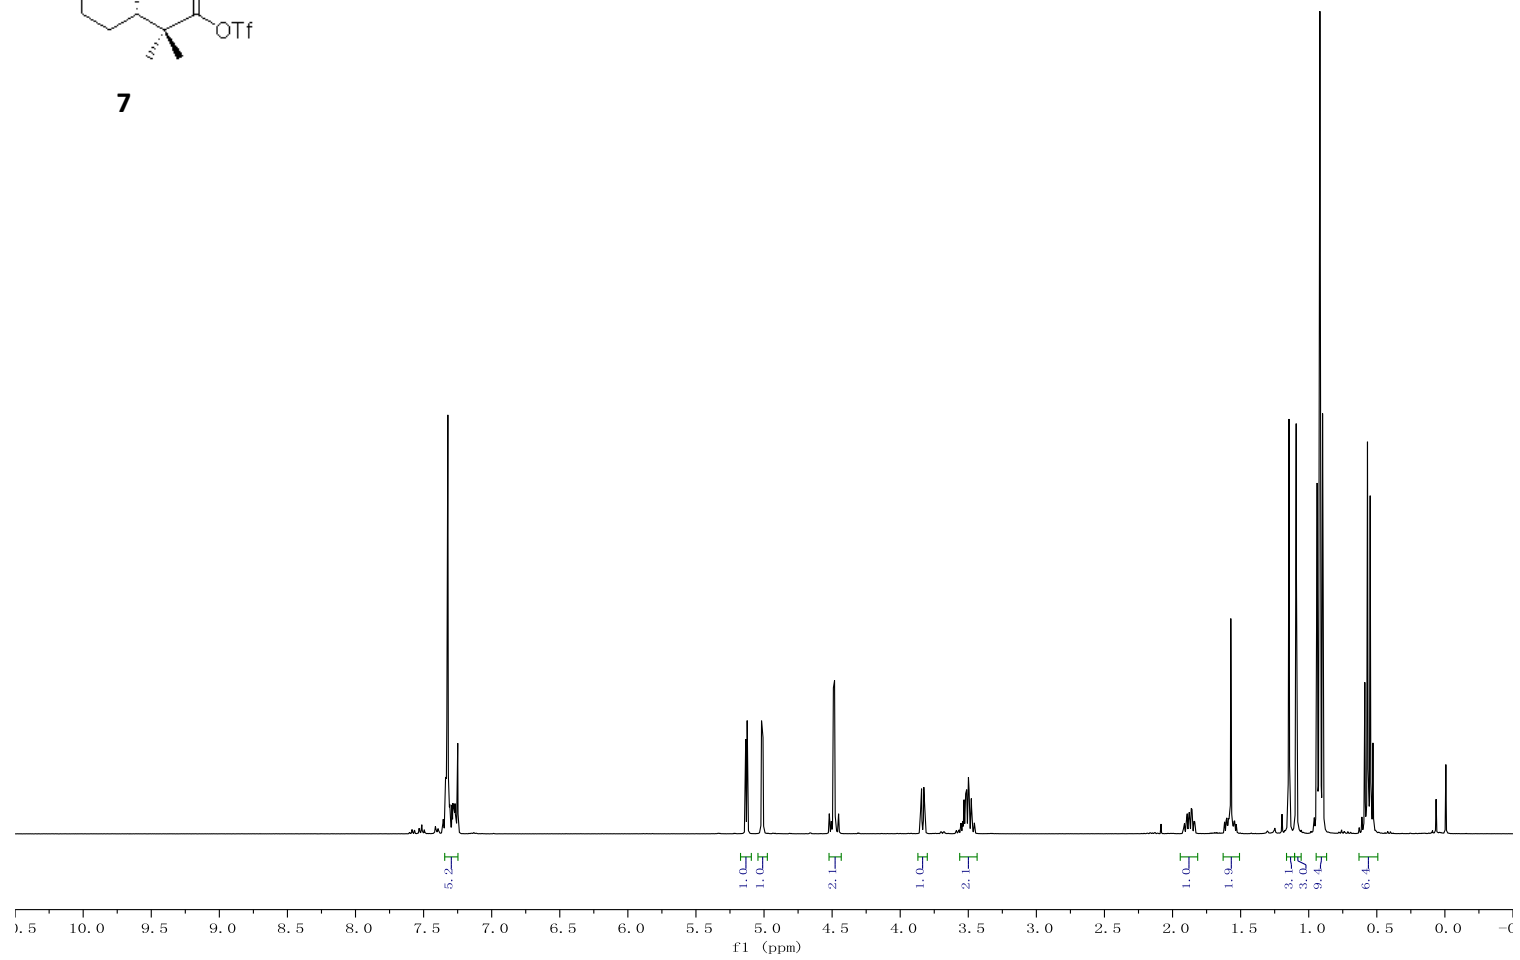

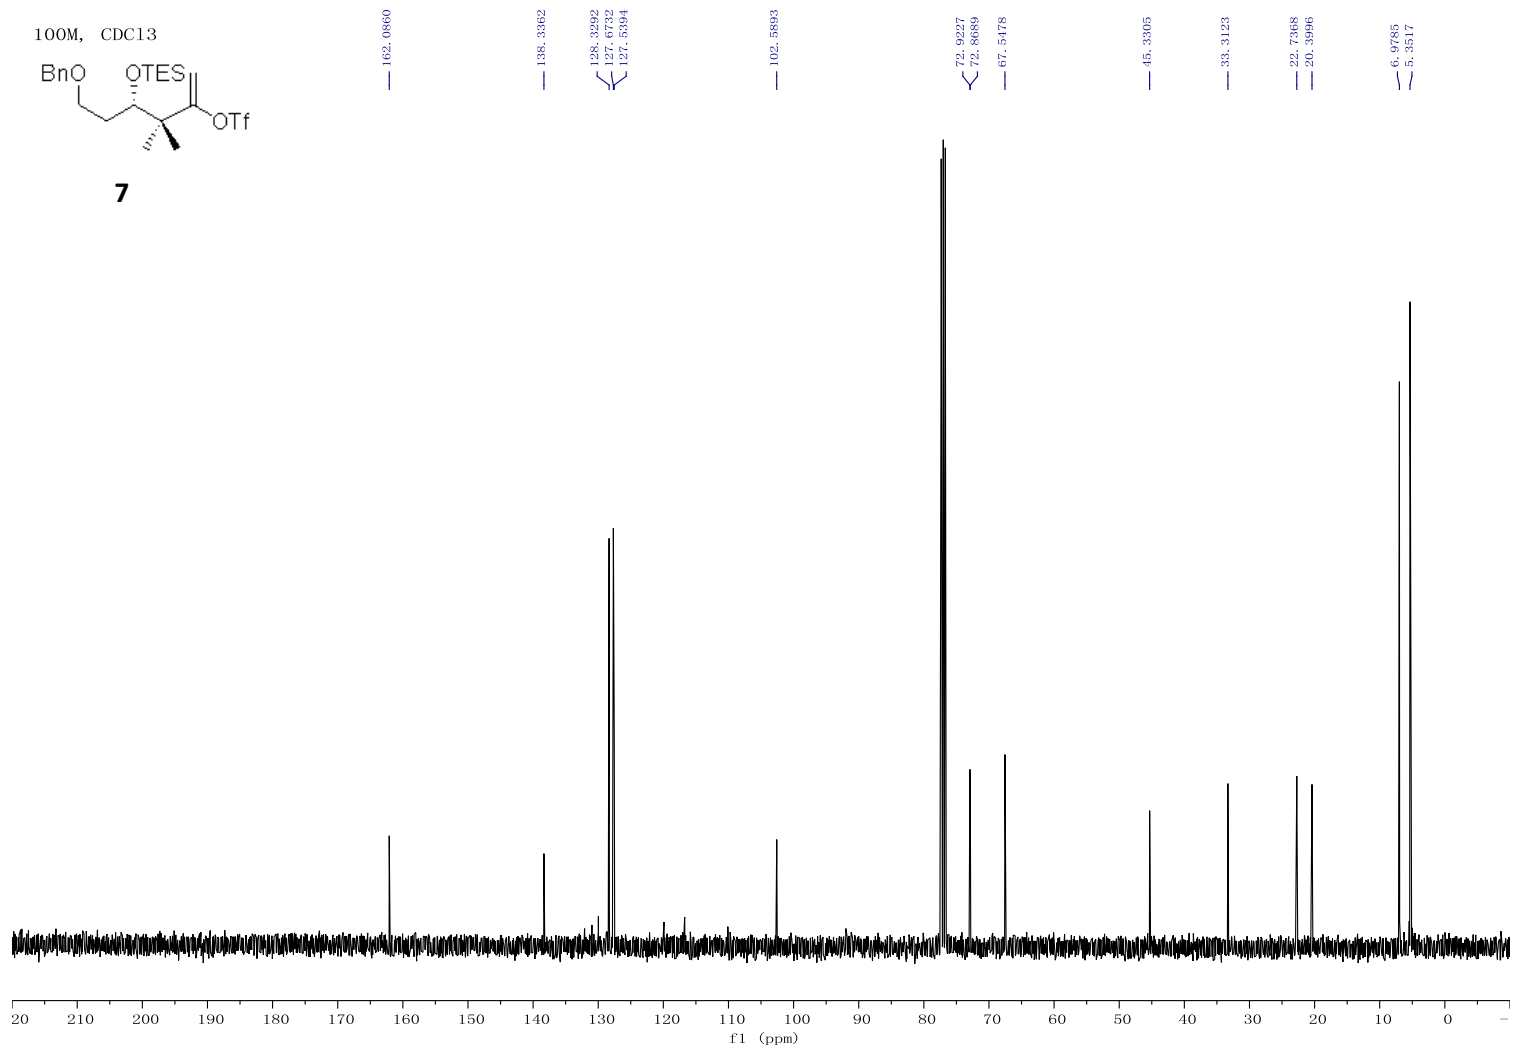



500M, CDC13

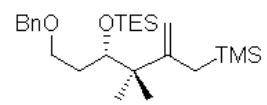

**8**

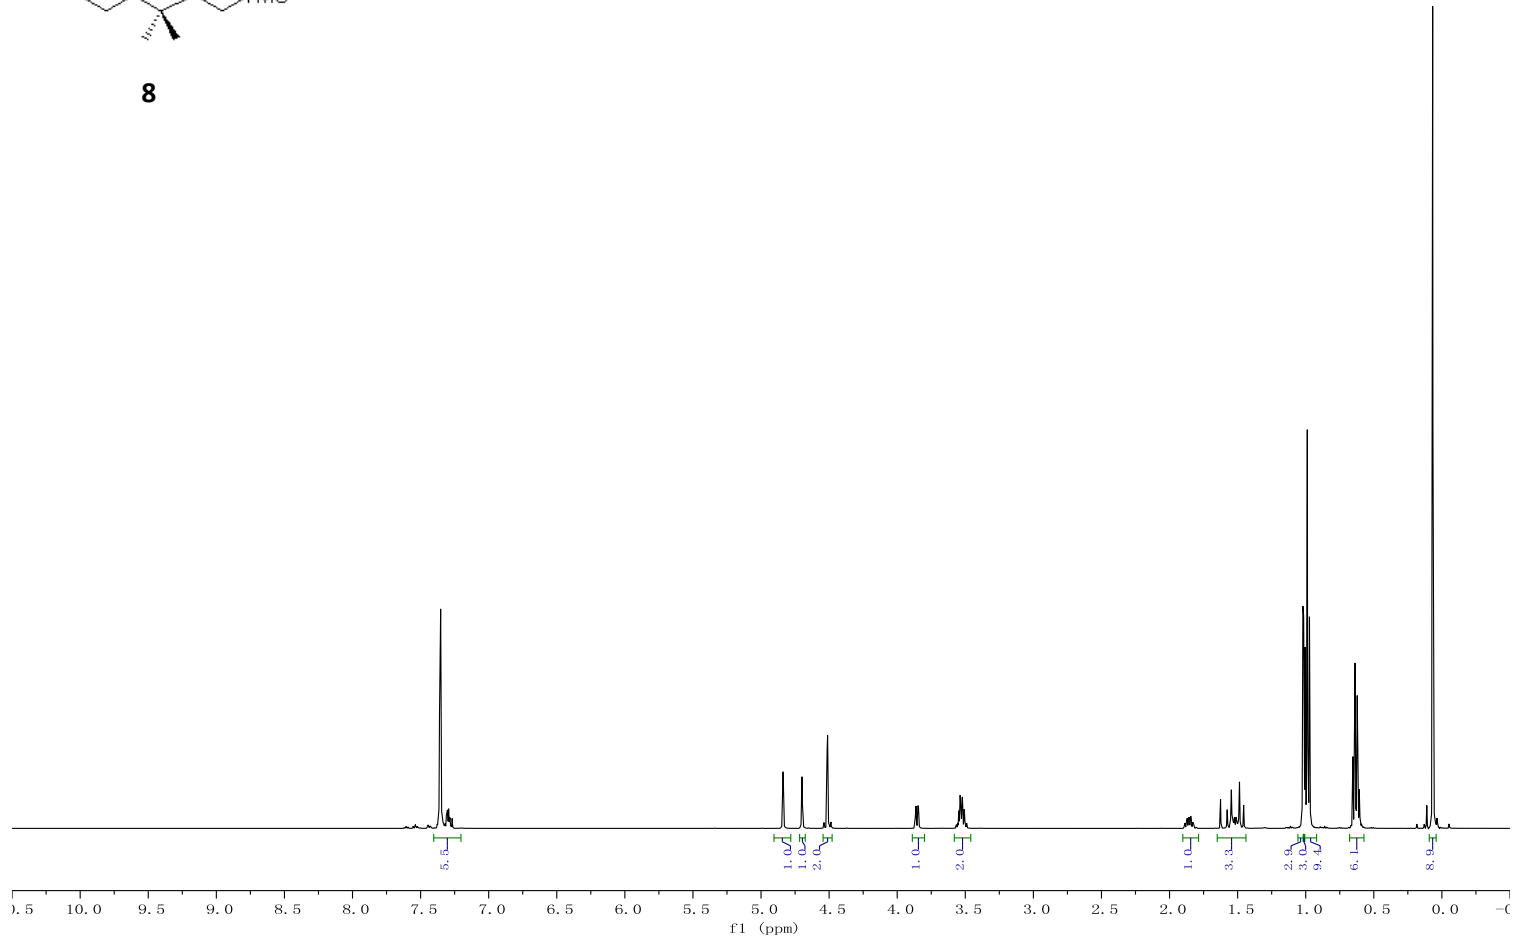

500M, CDC13

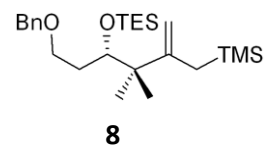

152.6966

138.8256

128.3859  
127.6859

109.2100

75.0731  
72.8799  
68.3744

45.1639

33.6897

25.8468  
21.4118  
20.5021

7.2654  
5.7116

0.3159

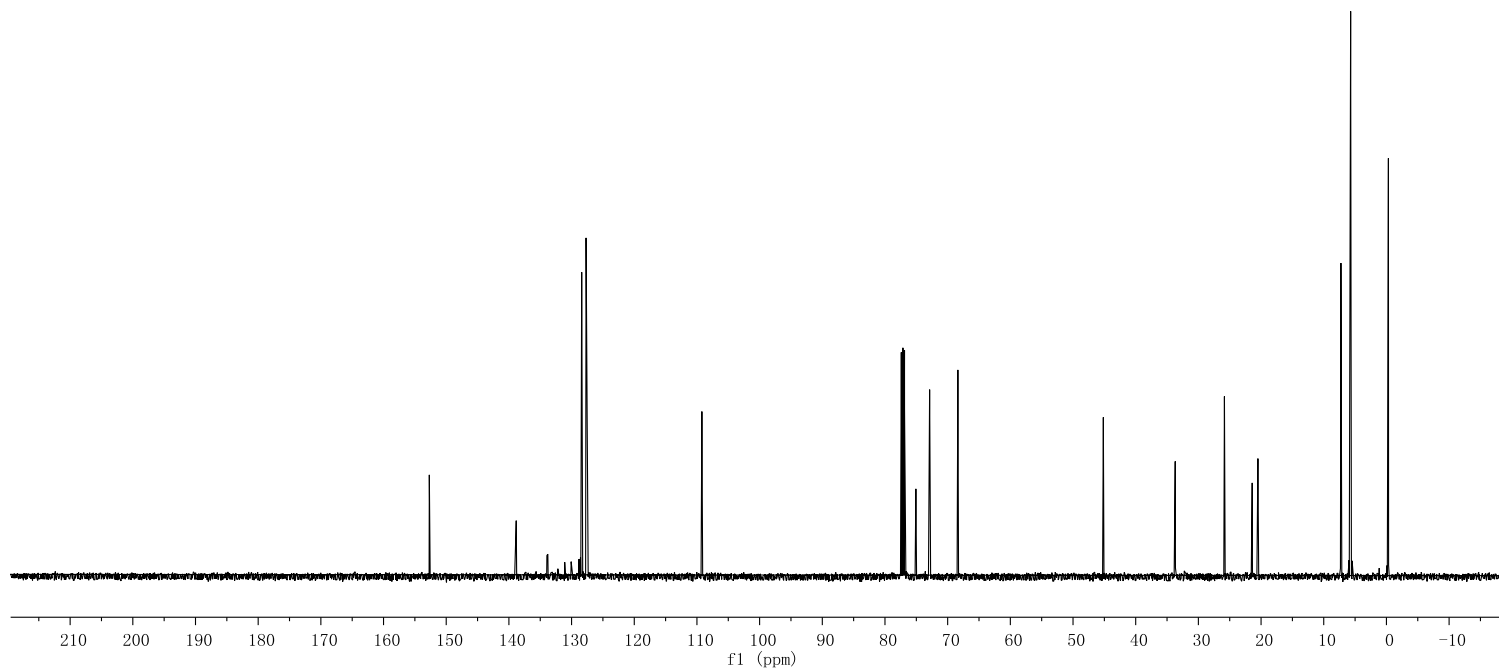

500M, CDC13

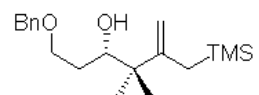

9

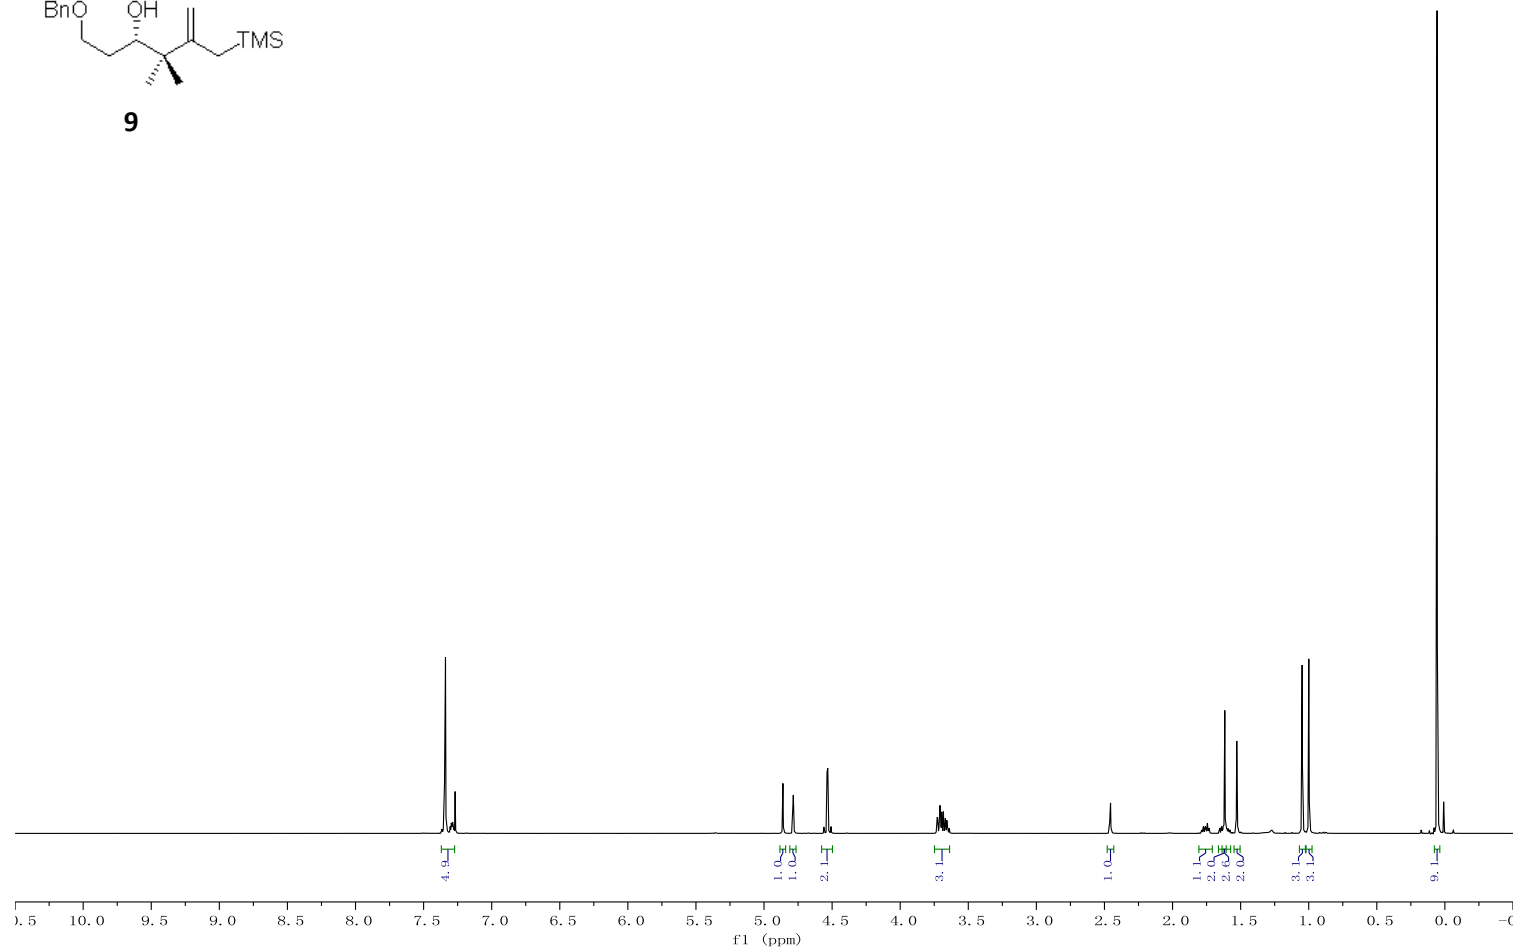

125M, CDCl<sub>3</sub>

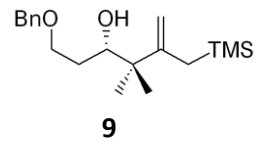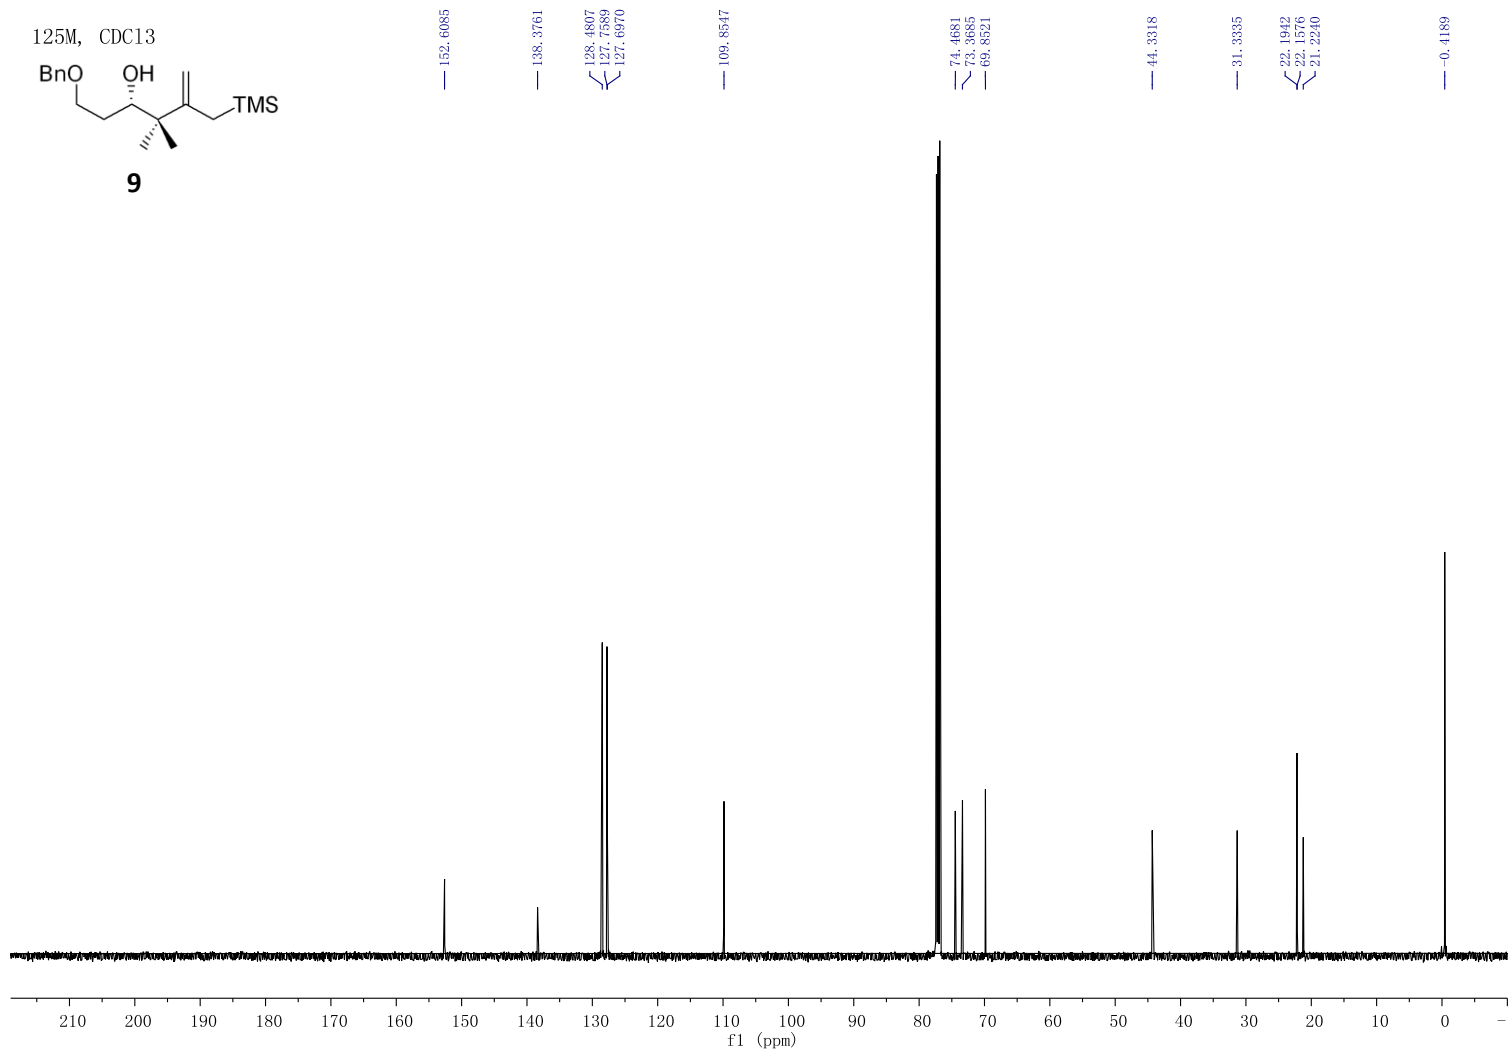

500M, CDC13

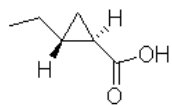

**11**

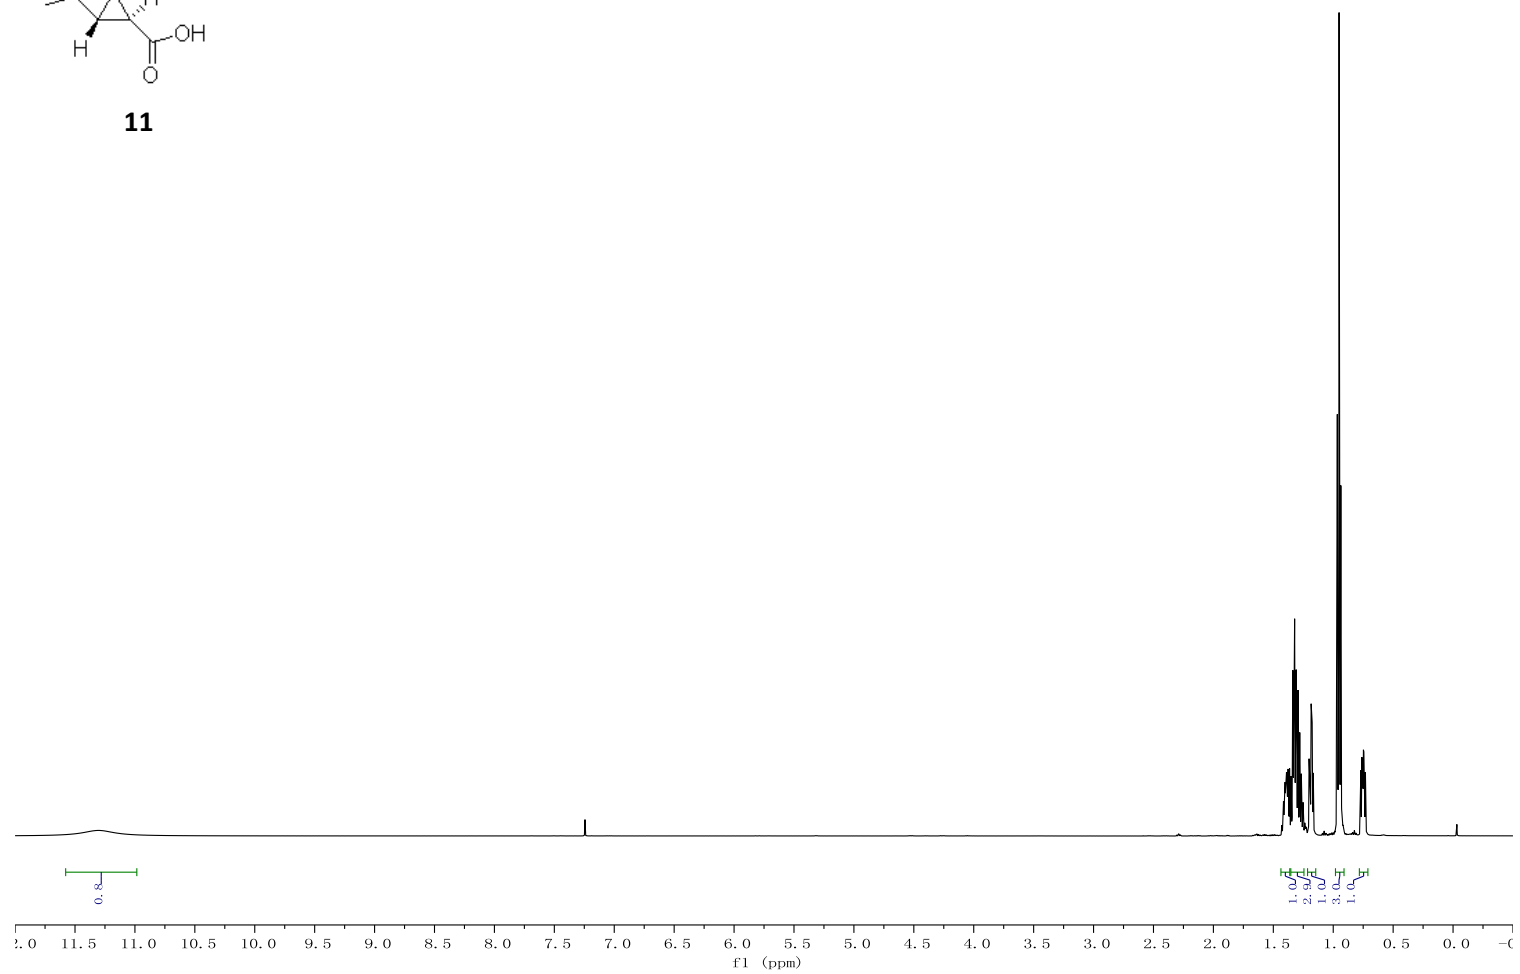

125M, CDCl<sub>3</sub>

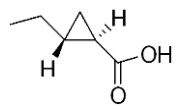

**11**

181.4288

26.1852  
25.7233

19.9785  
16.2118  
13.1742

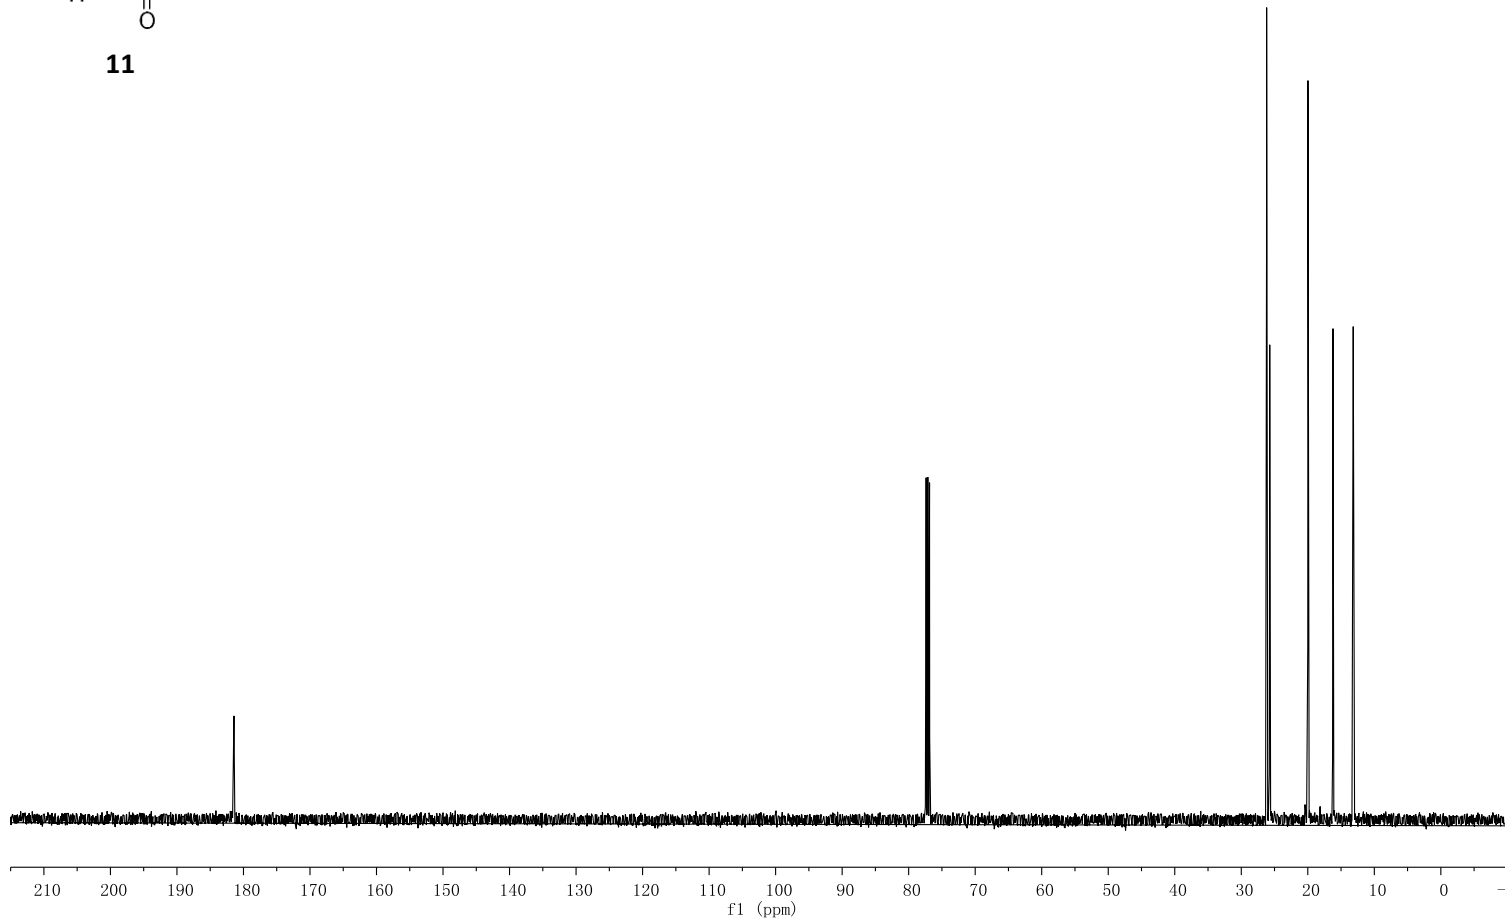

500M, CDCl<sub>3</sub>

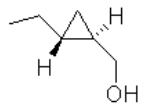

**11-OH**

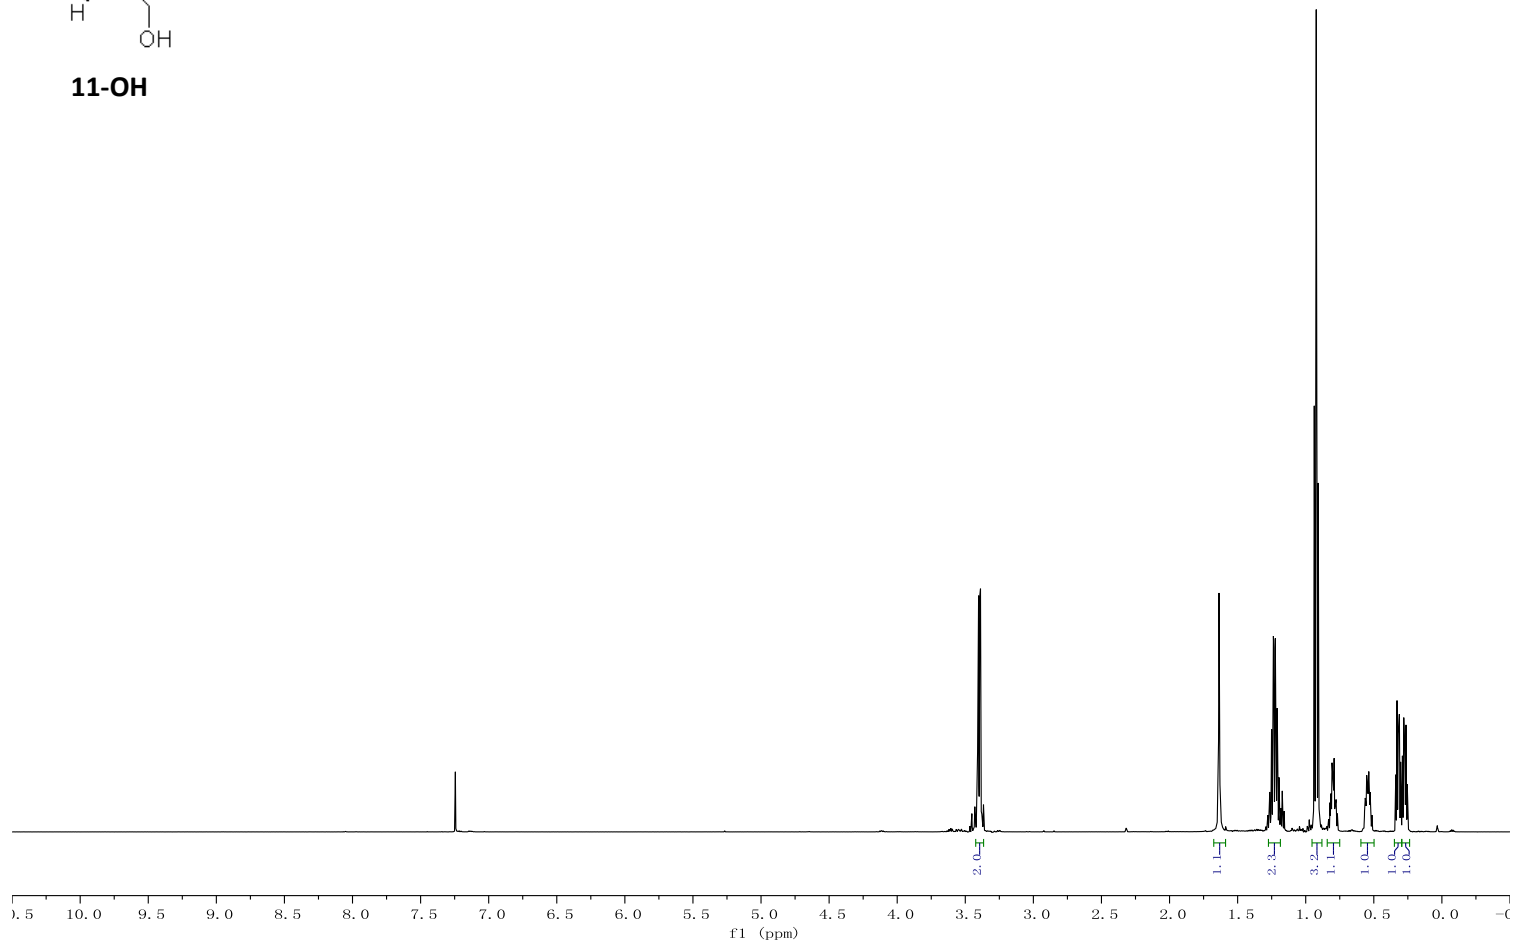

125M, CDC13

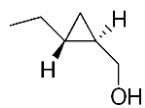

**11-OH**

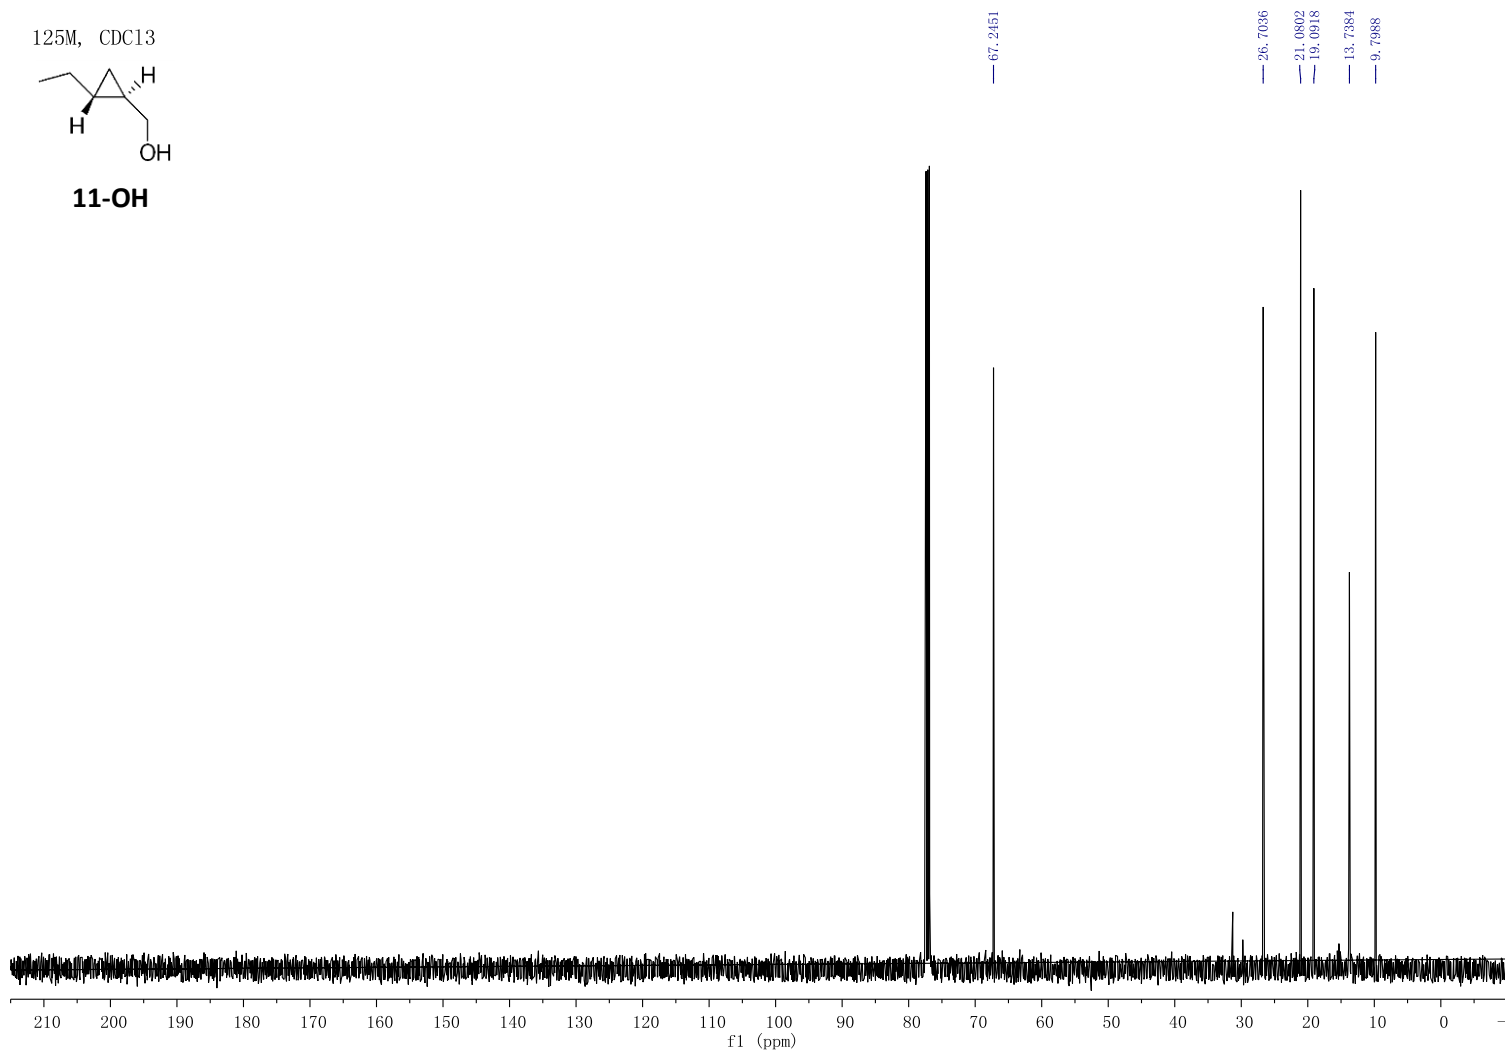



500M, CDCl3

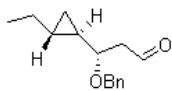

**12**

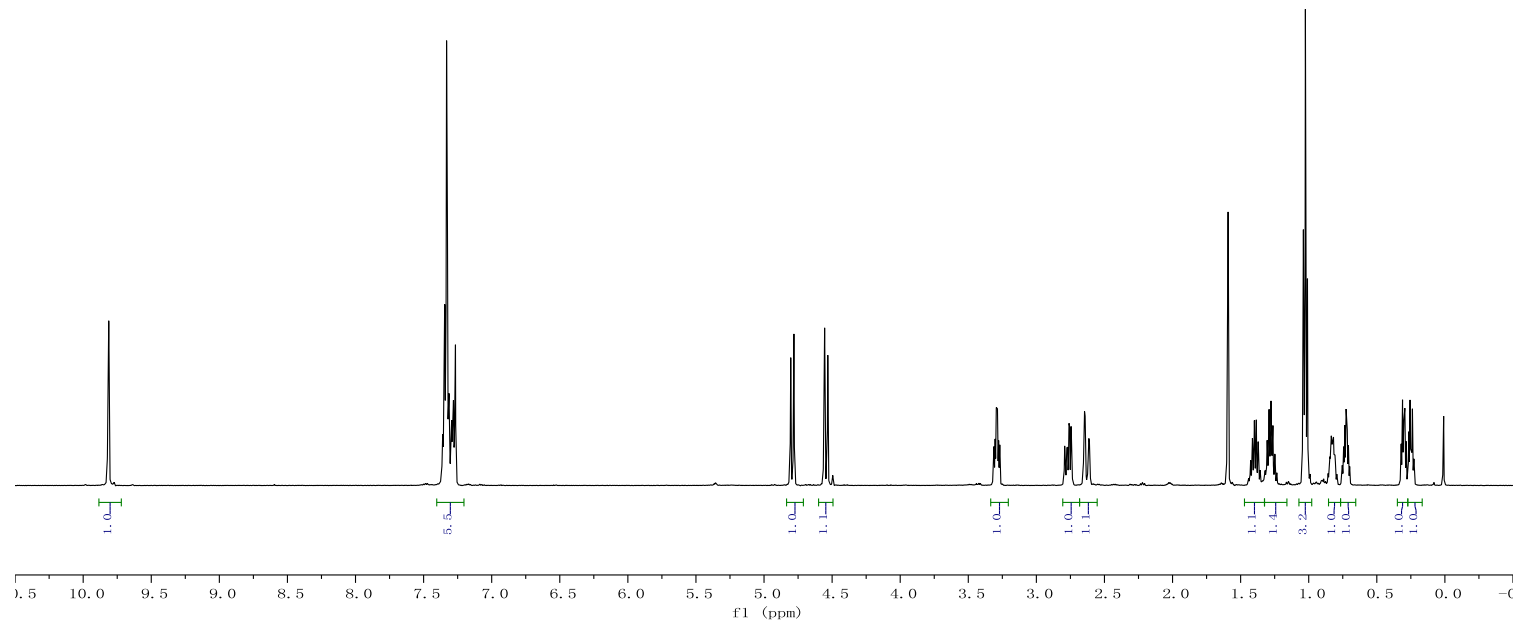

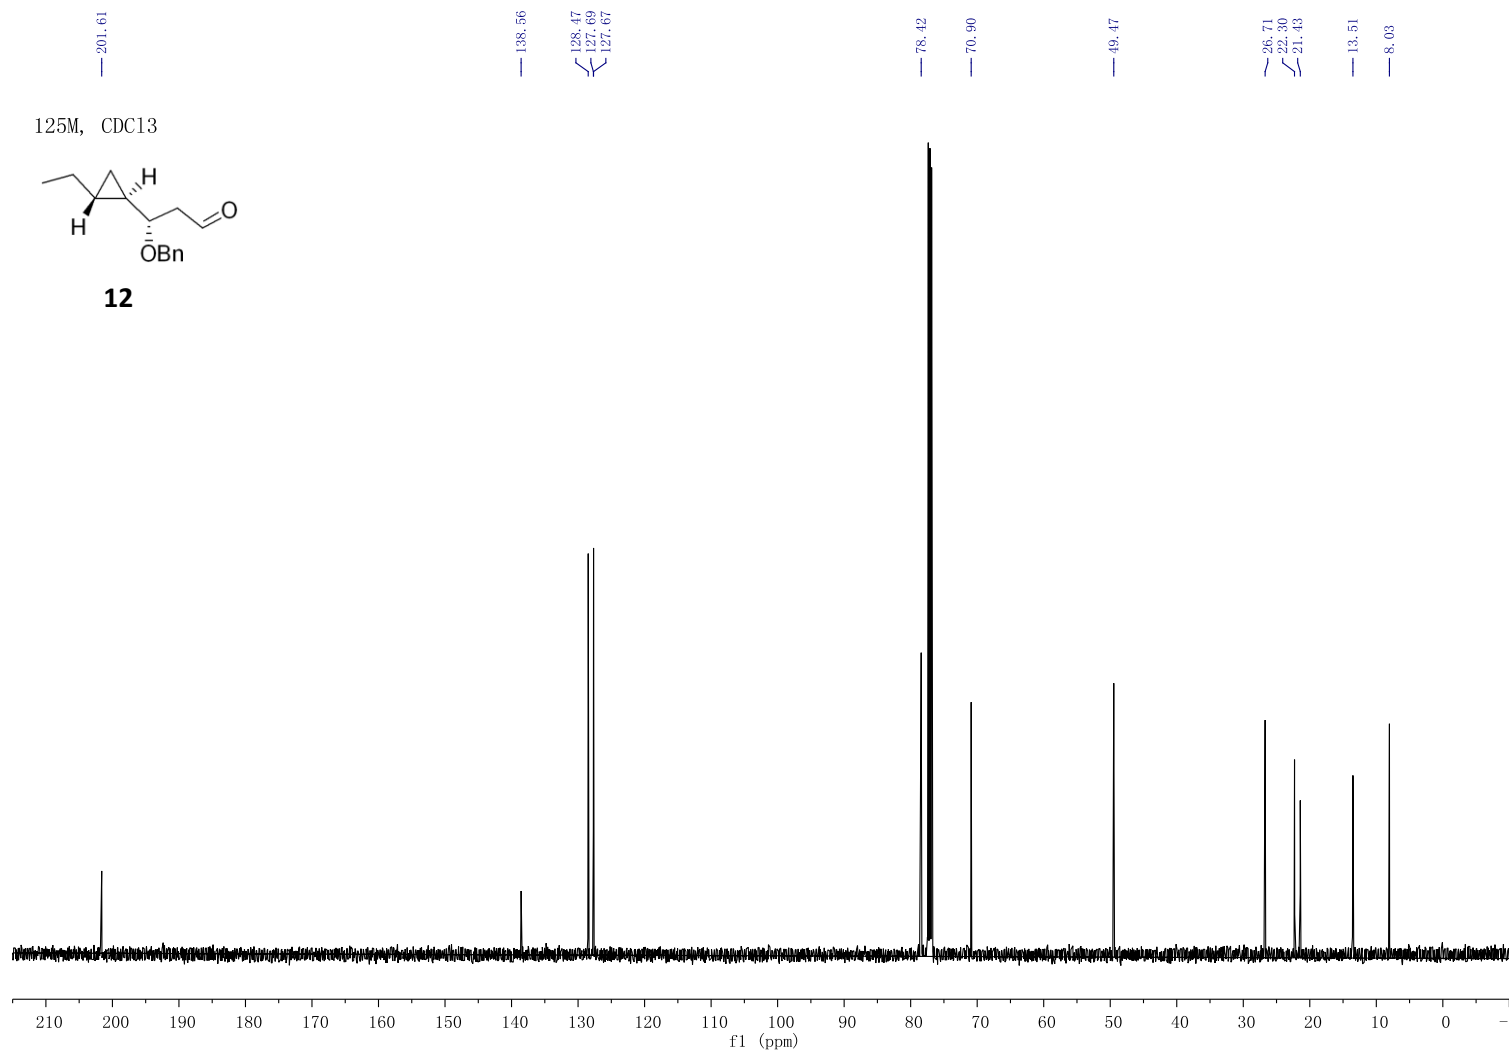

500M, CDC13

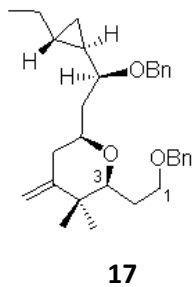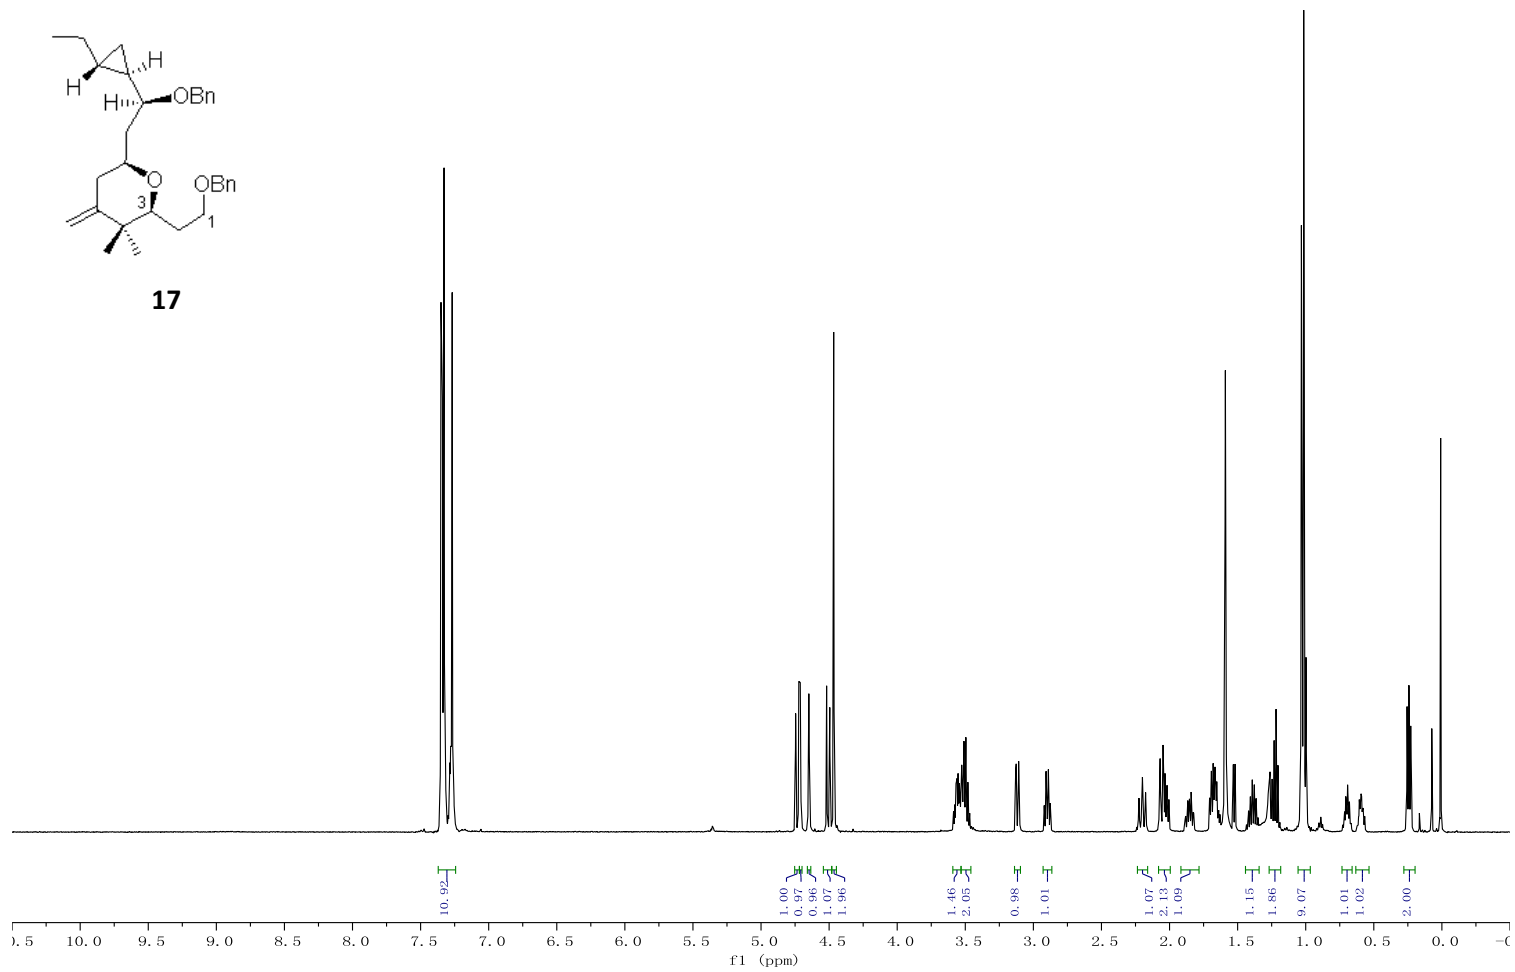

125M, CDC13

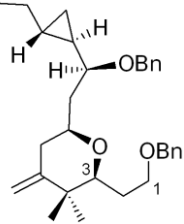

**17**

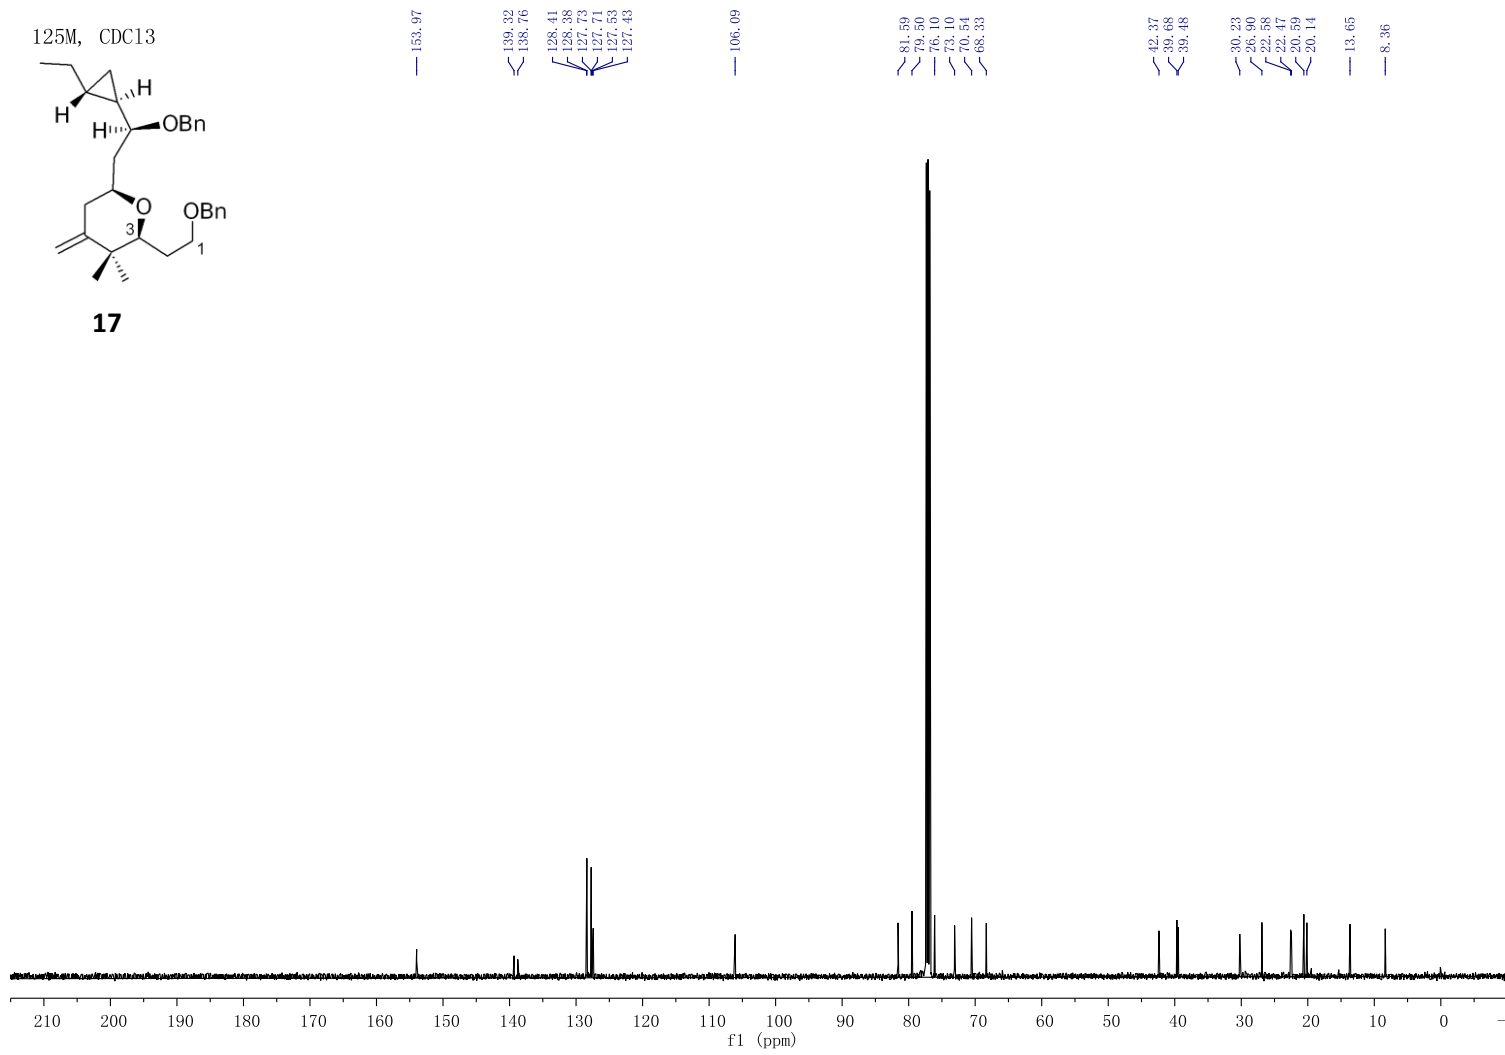

500M, CDCl<sub>3</sub>

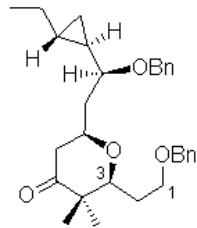

**18**

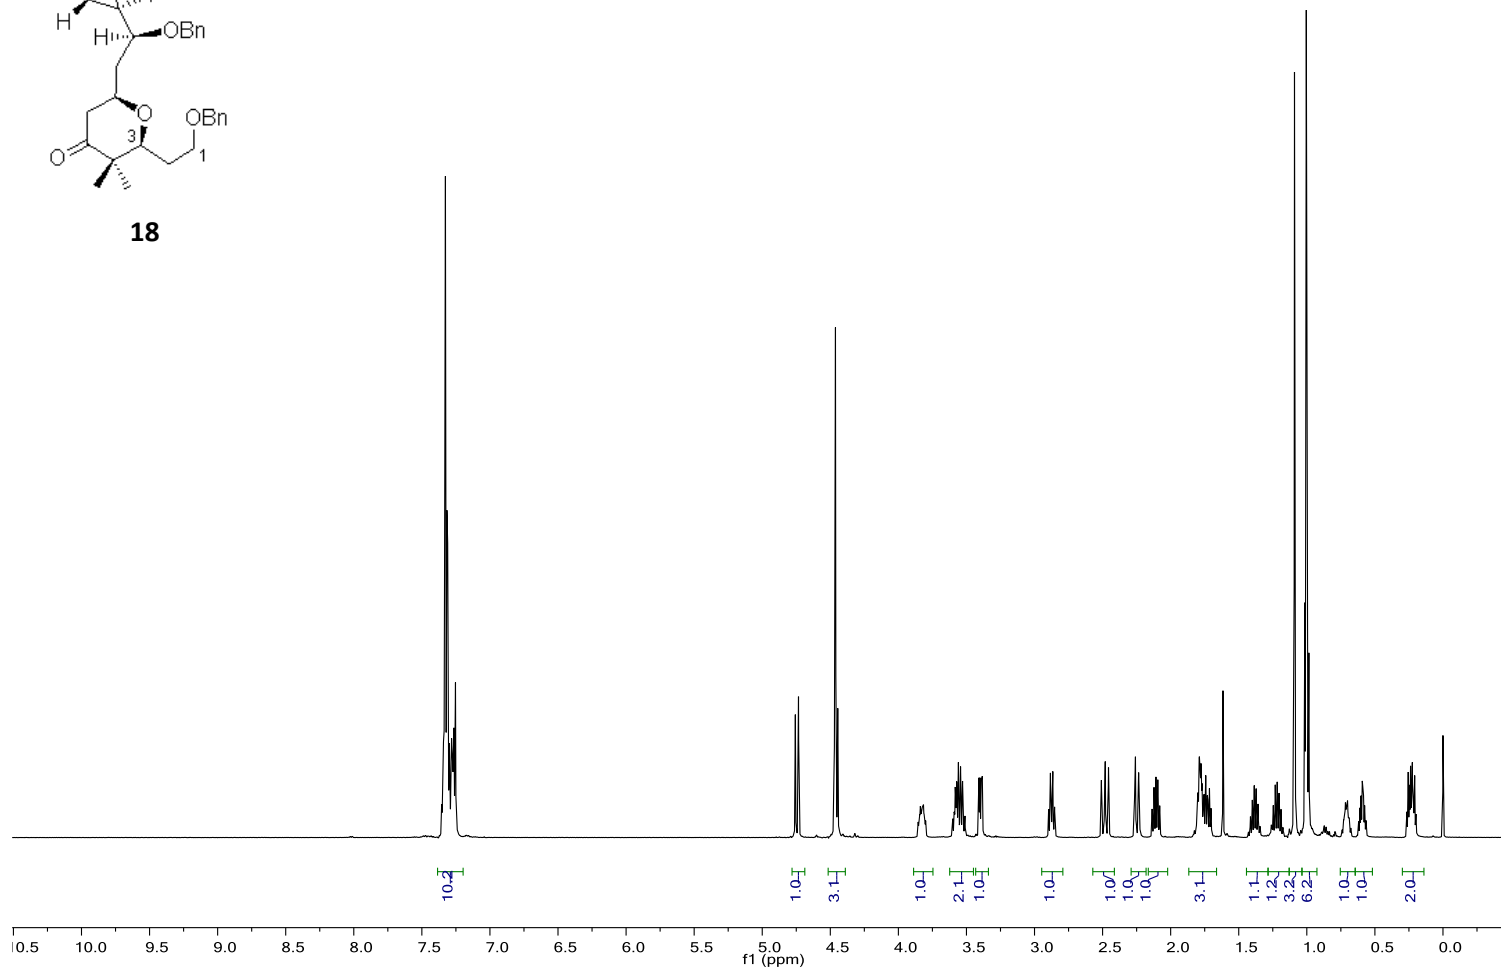

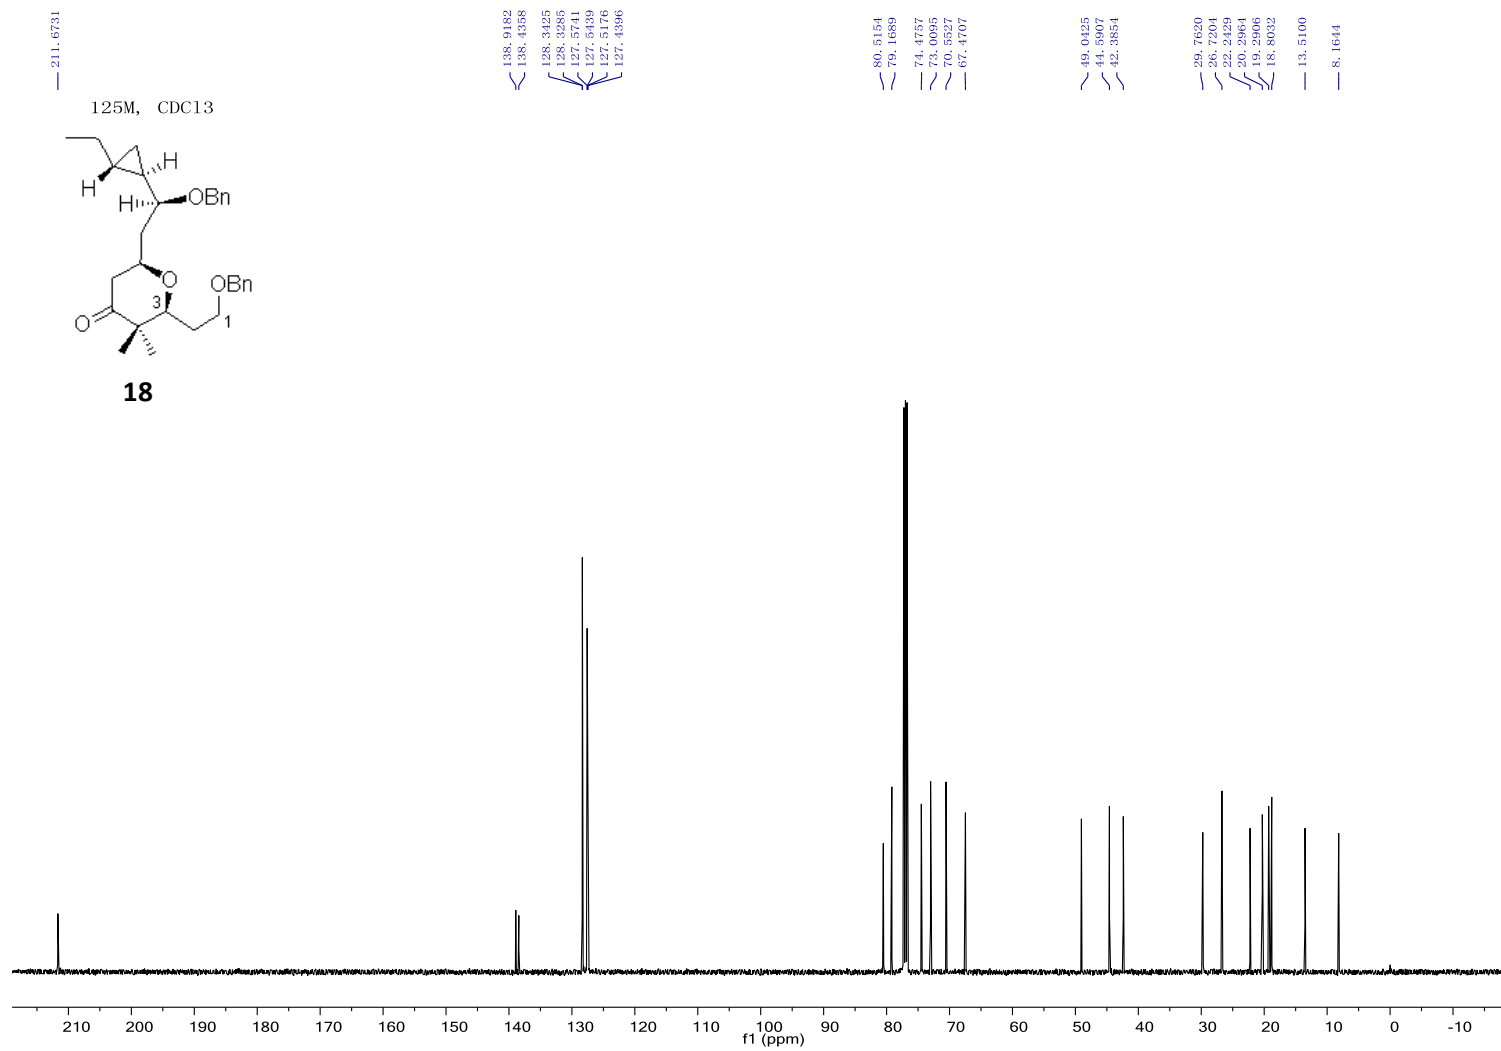

500M, CDCl<sub>3</sub>

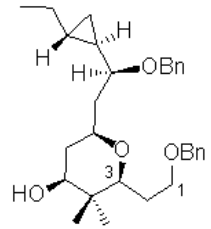

**19**

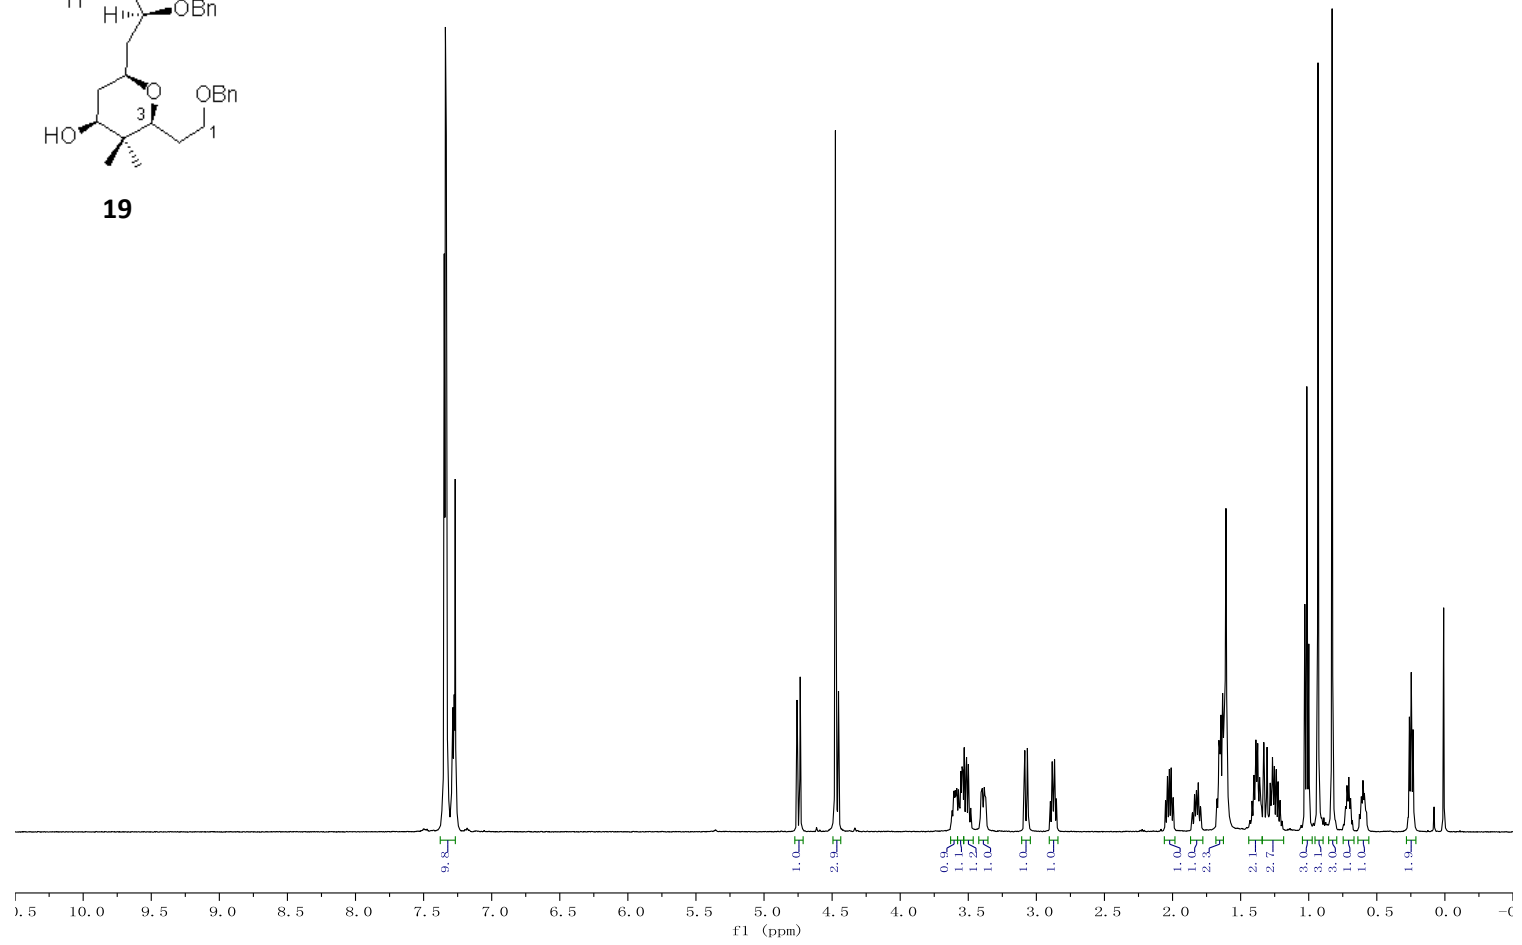

S71

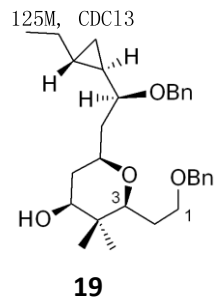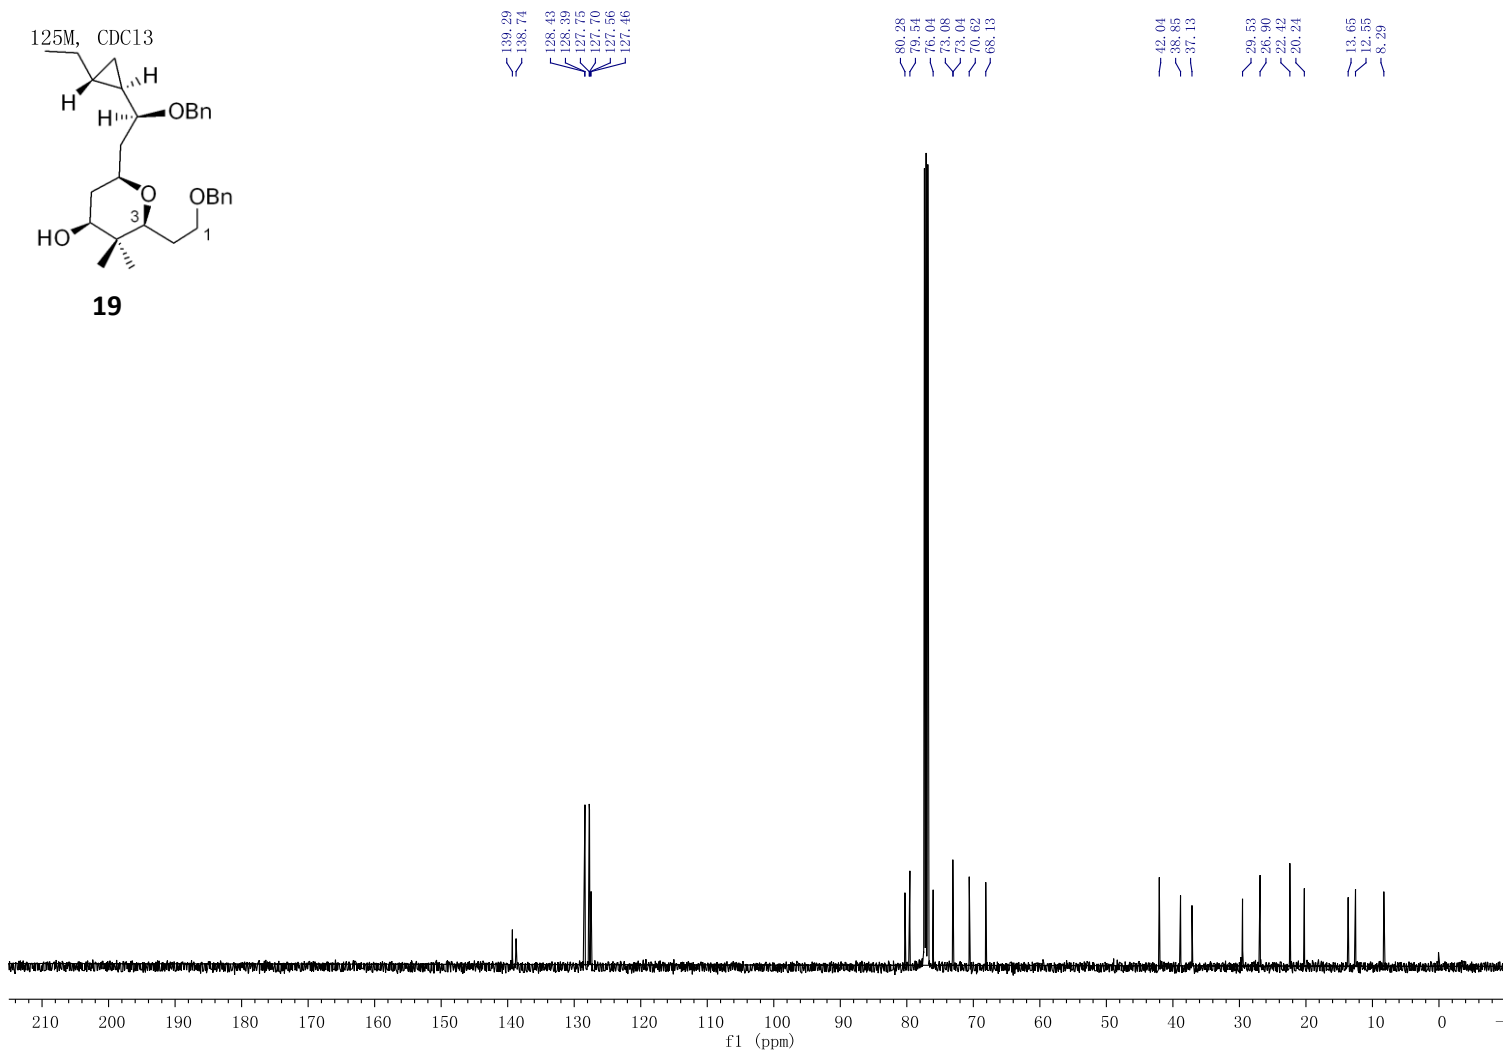



400M, CDC13

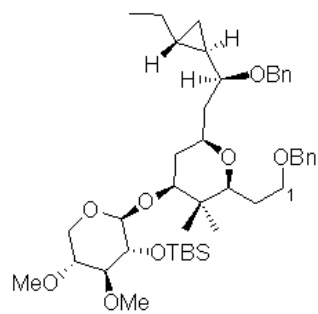

**20**

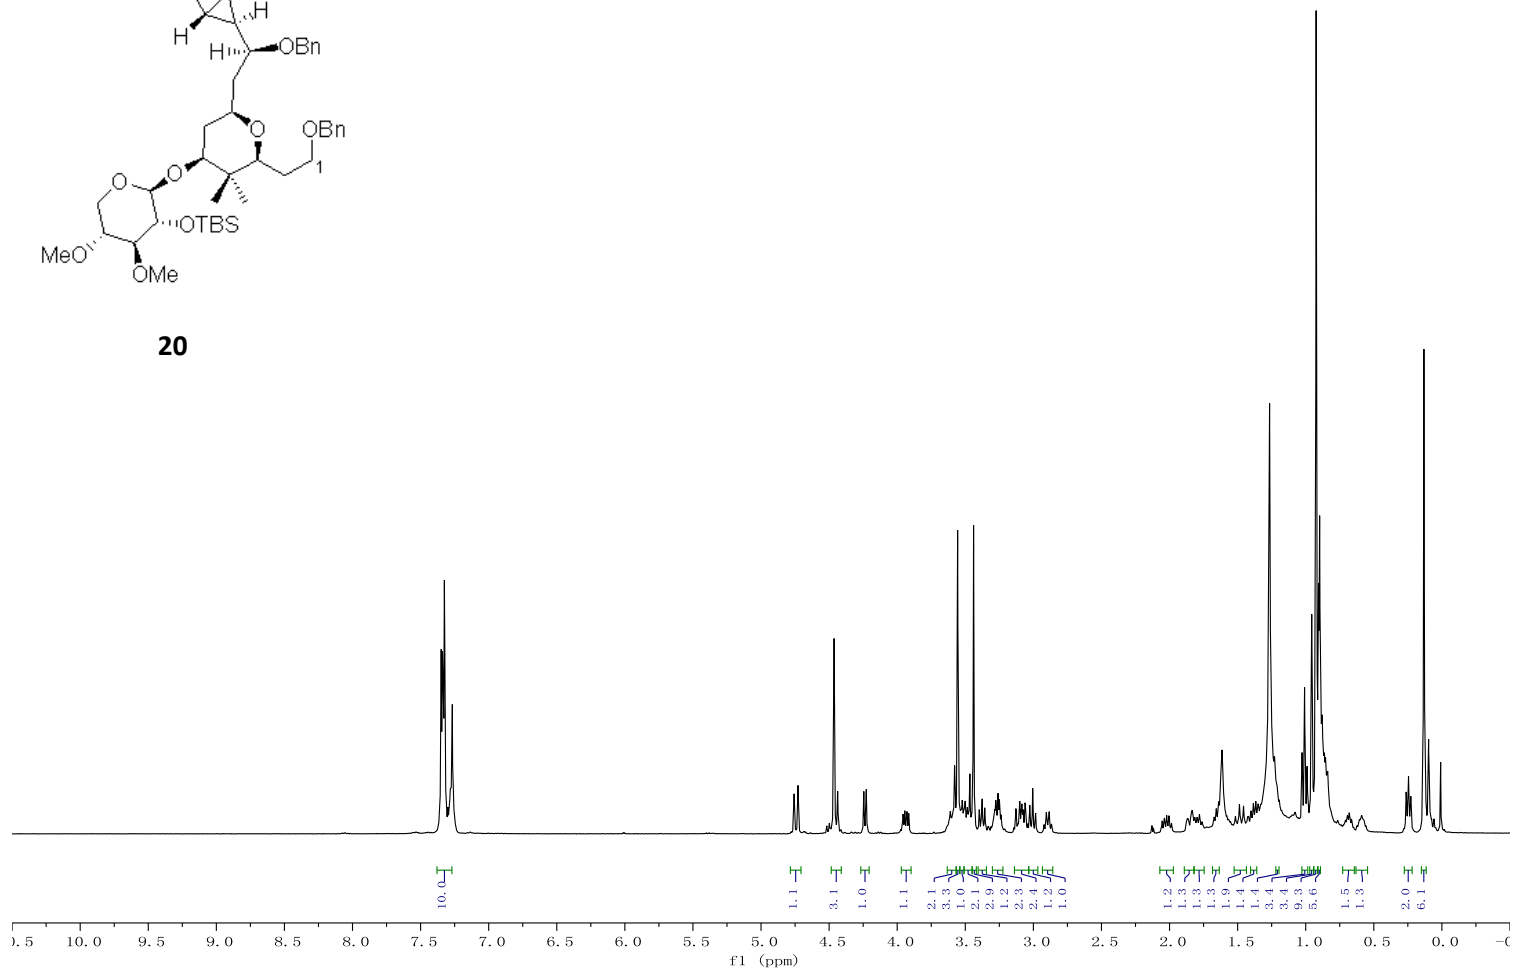

100M, CDC13

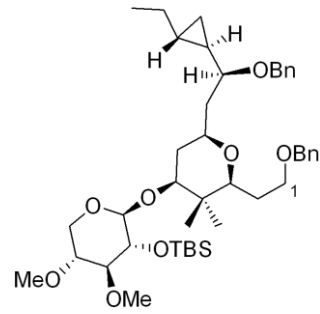

20

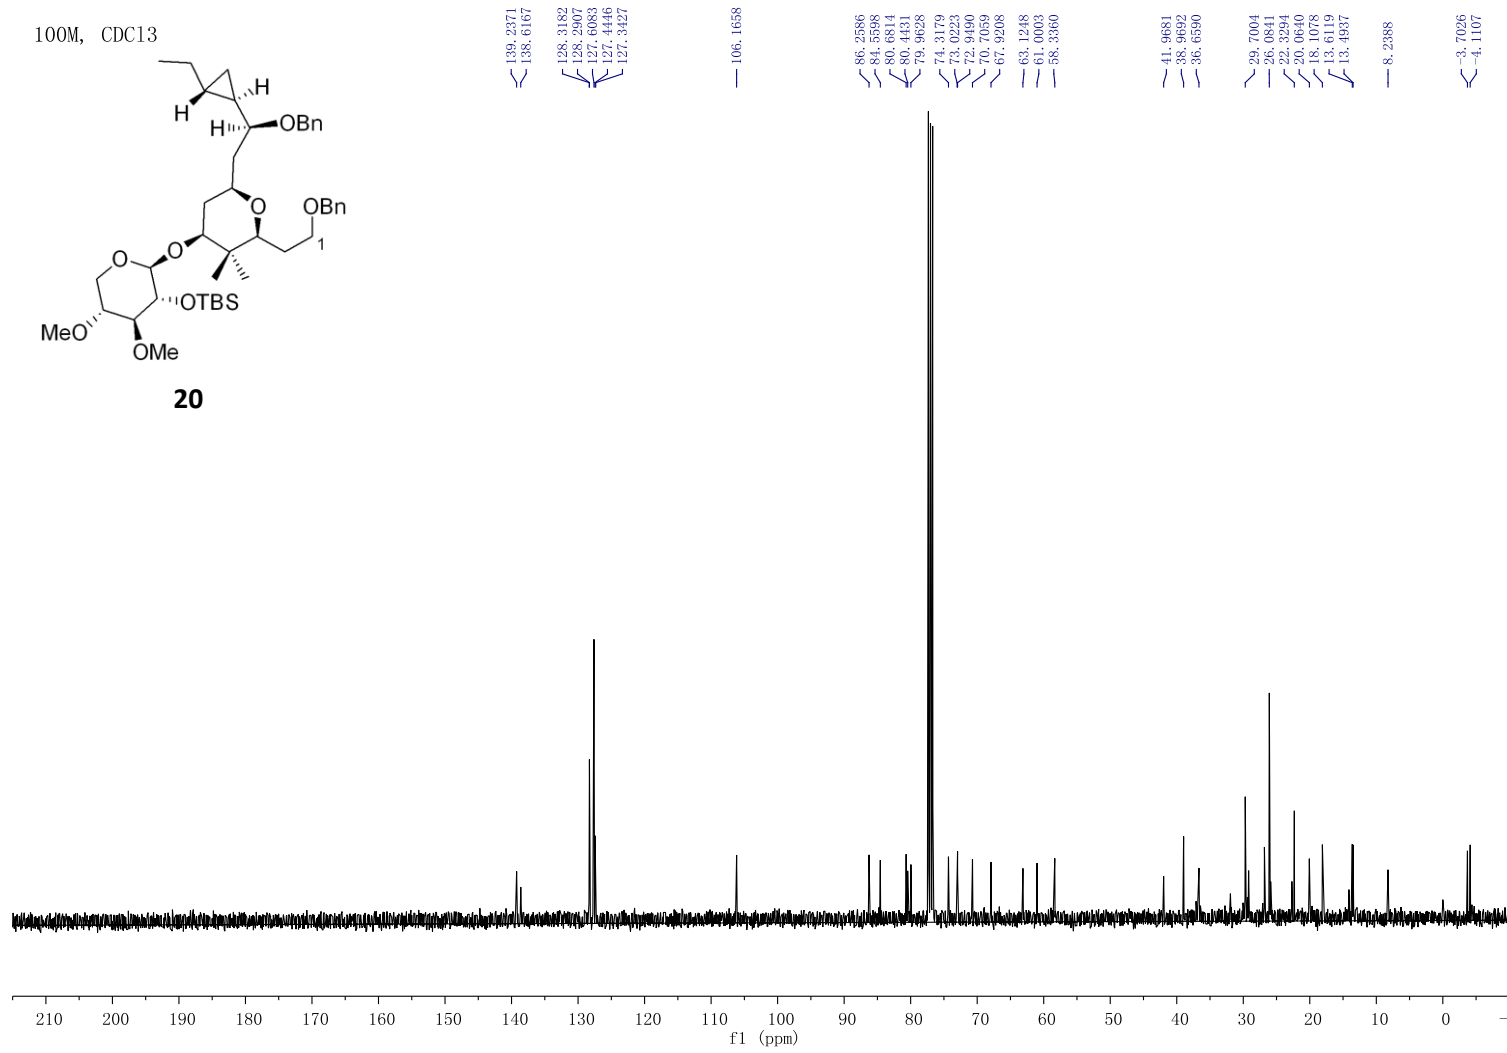

500M, CDC13

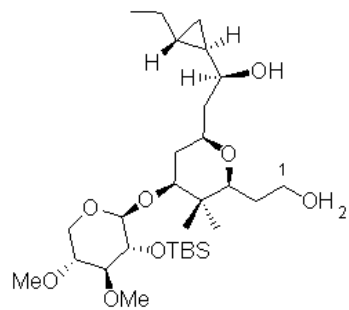

**21**

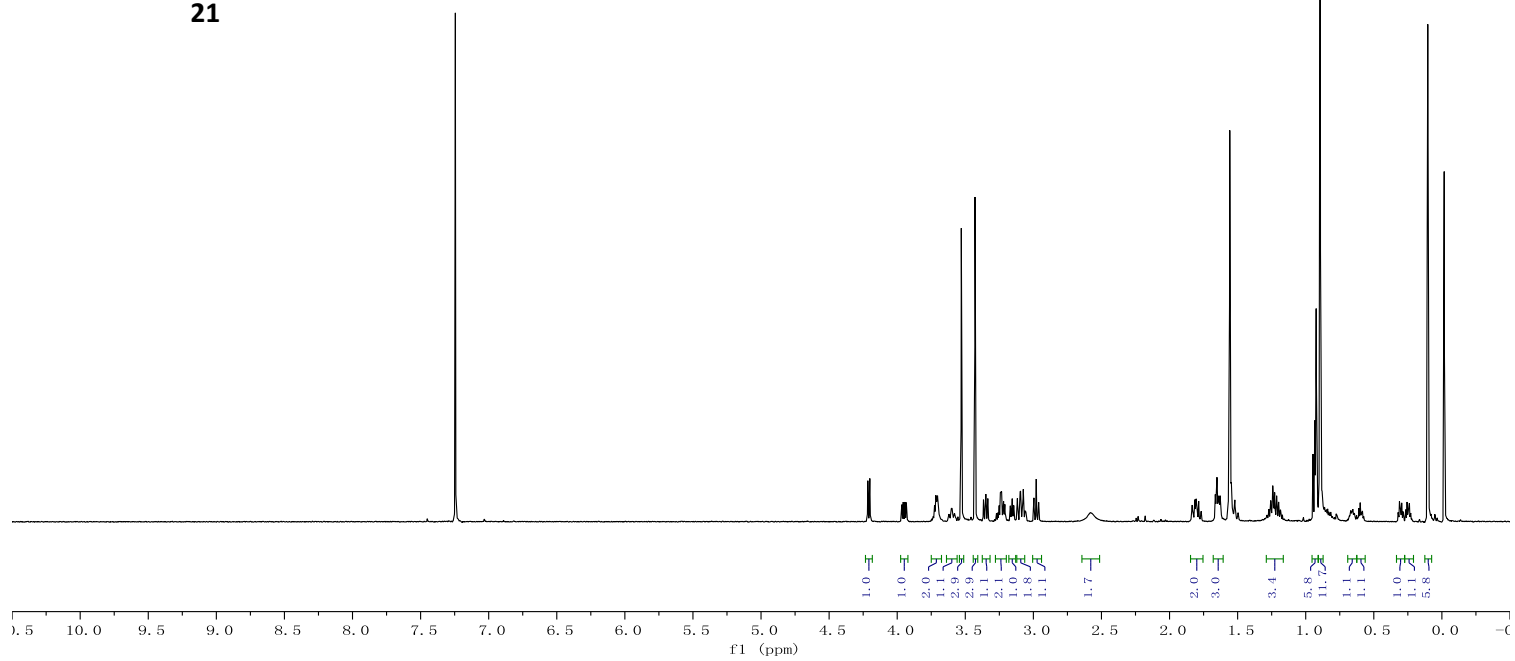

125M, CDC13

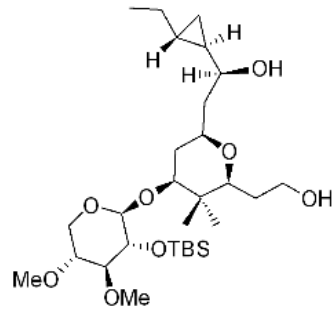

21

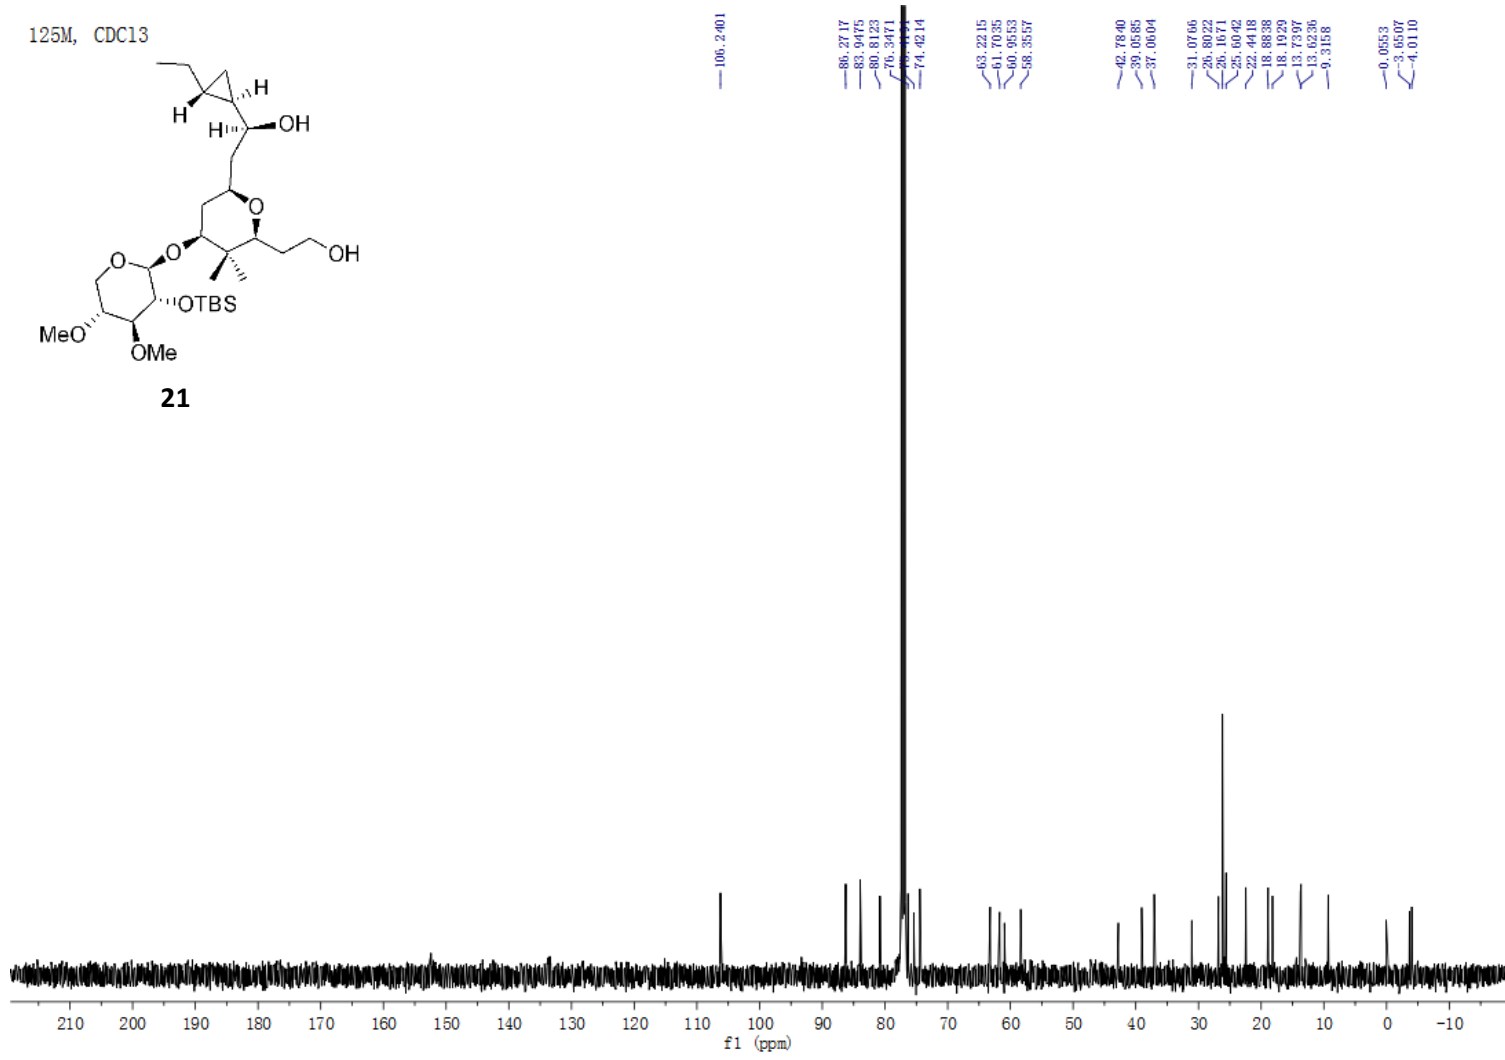

500M CD3CN

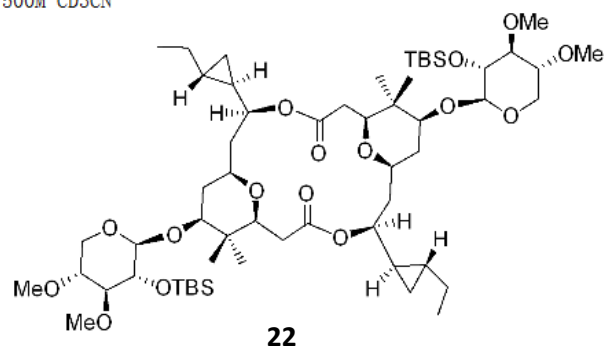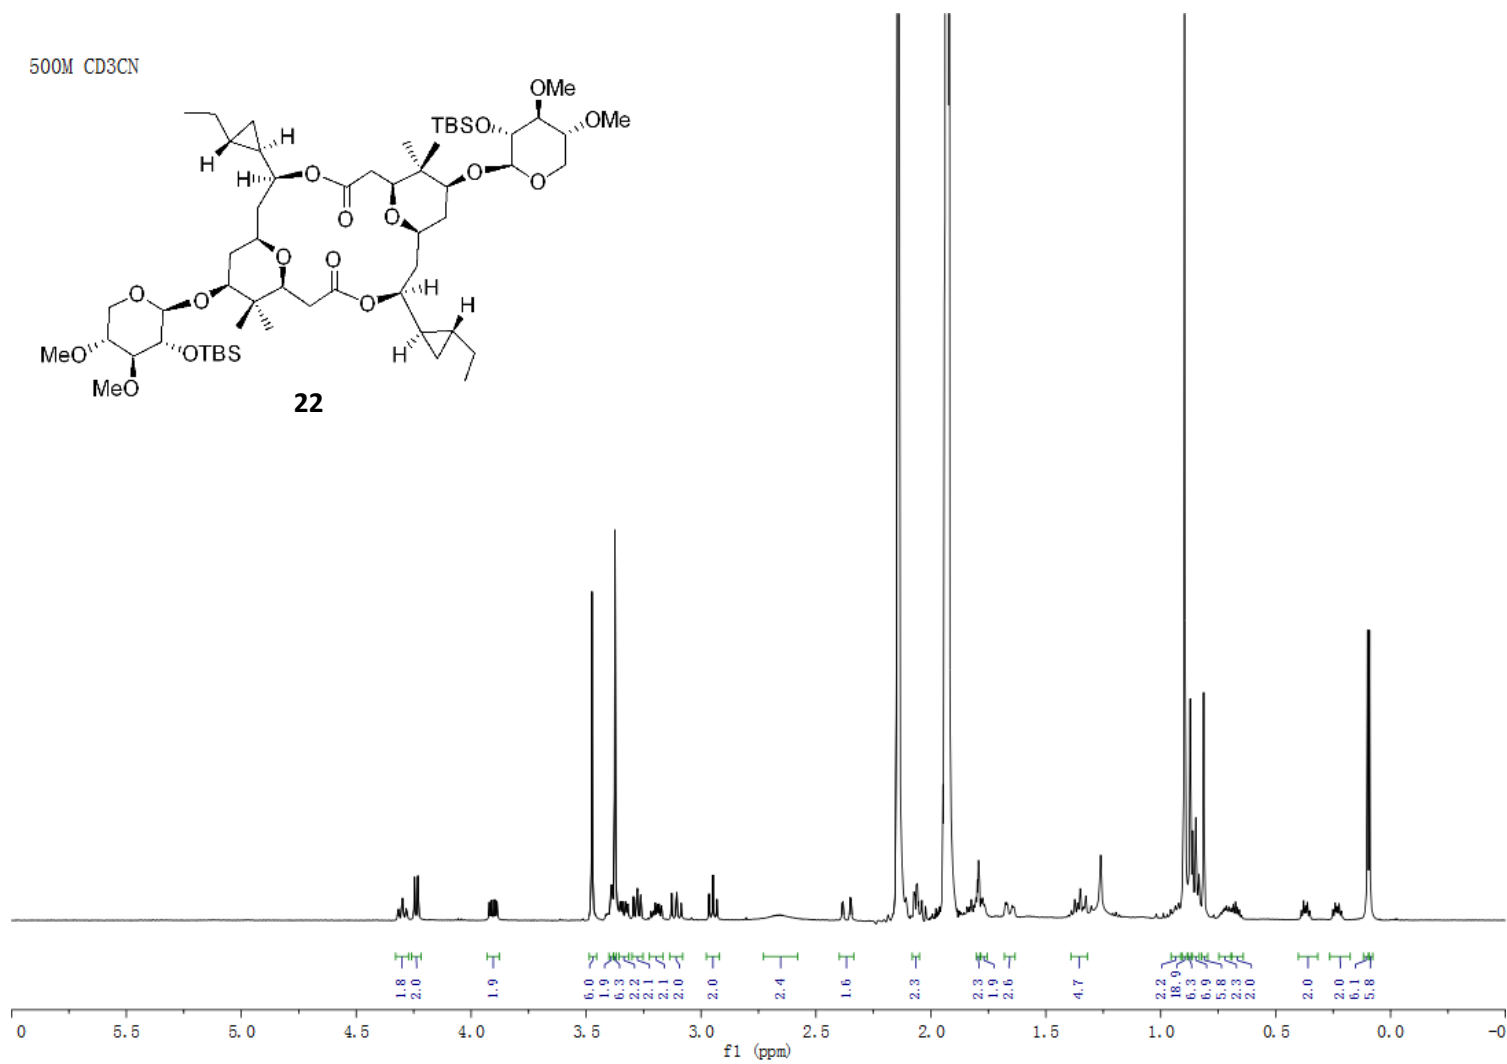

125M CD3CN

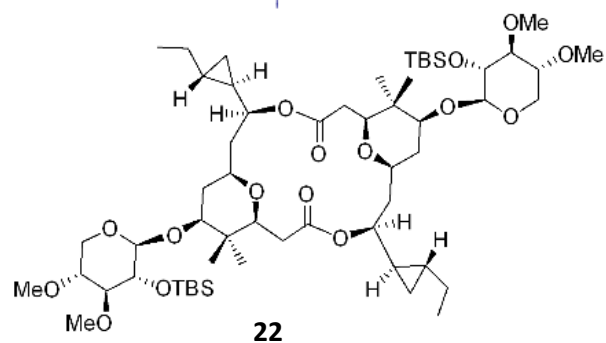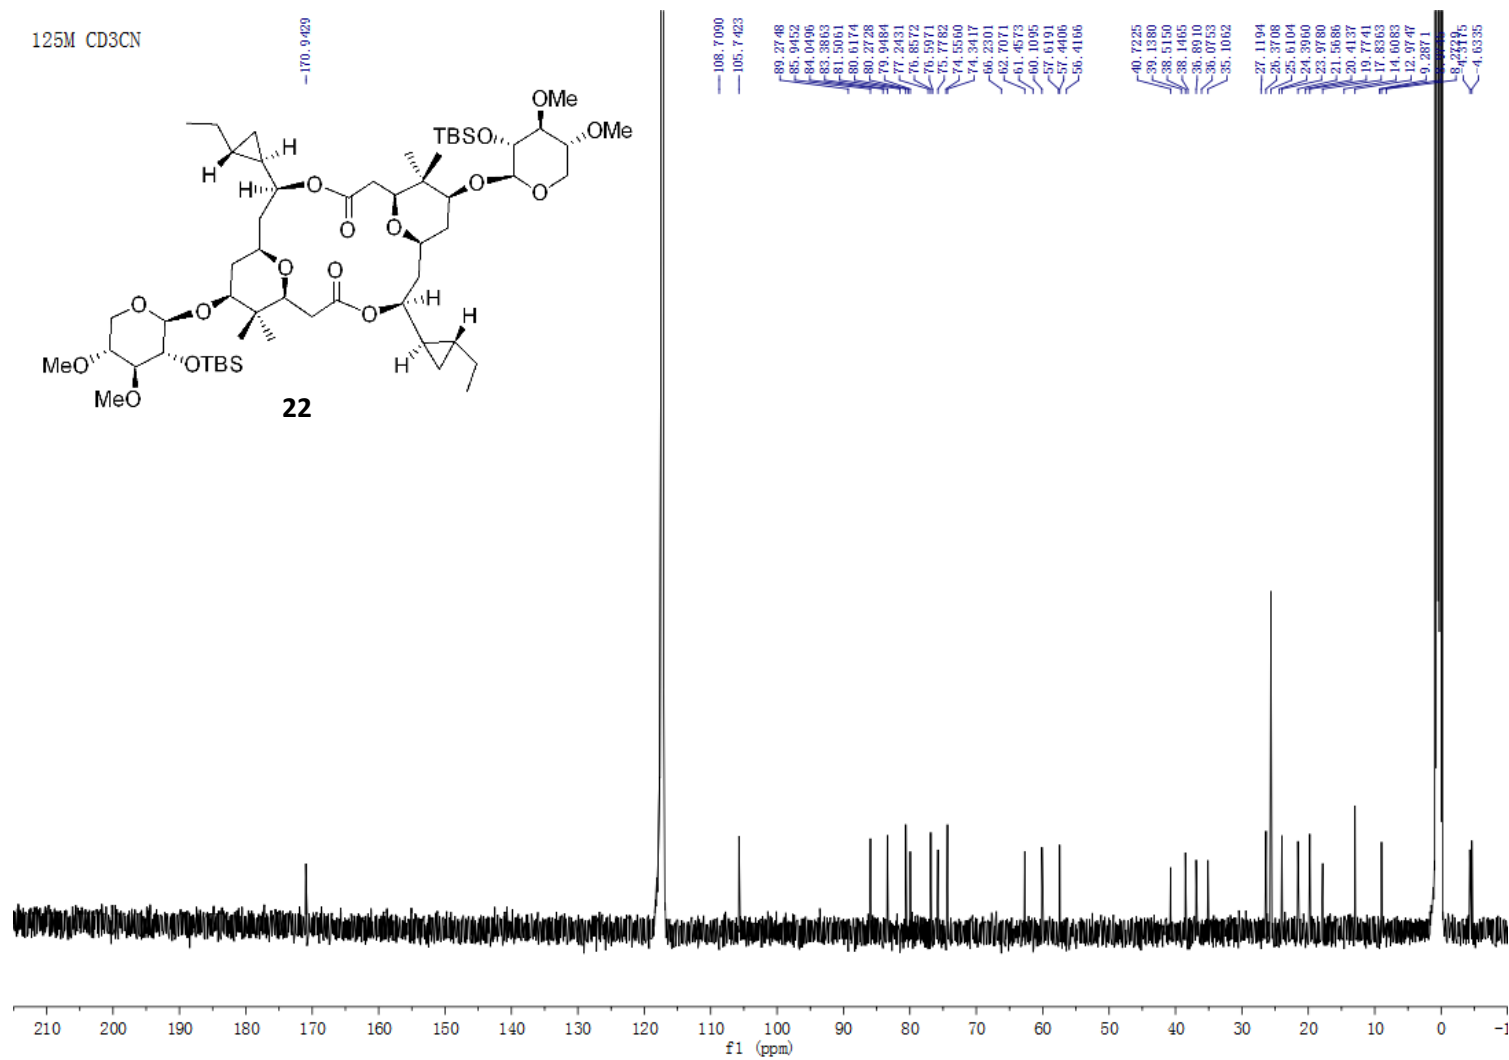

500M, CD3CN

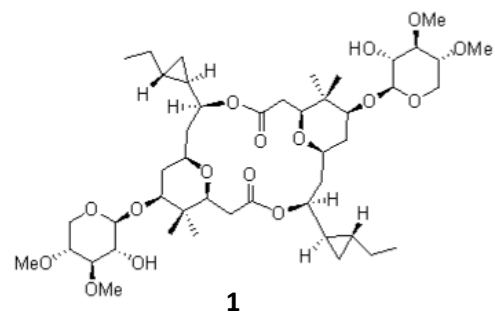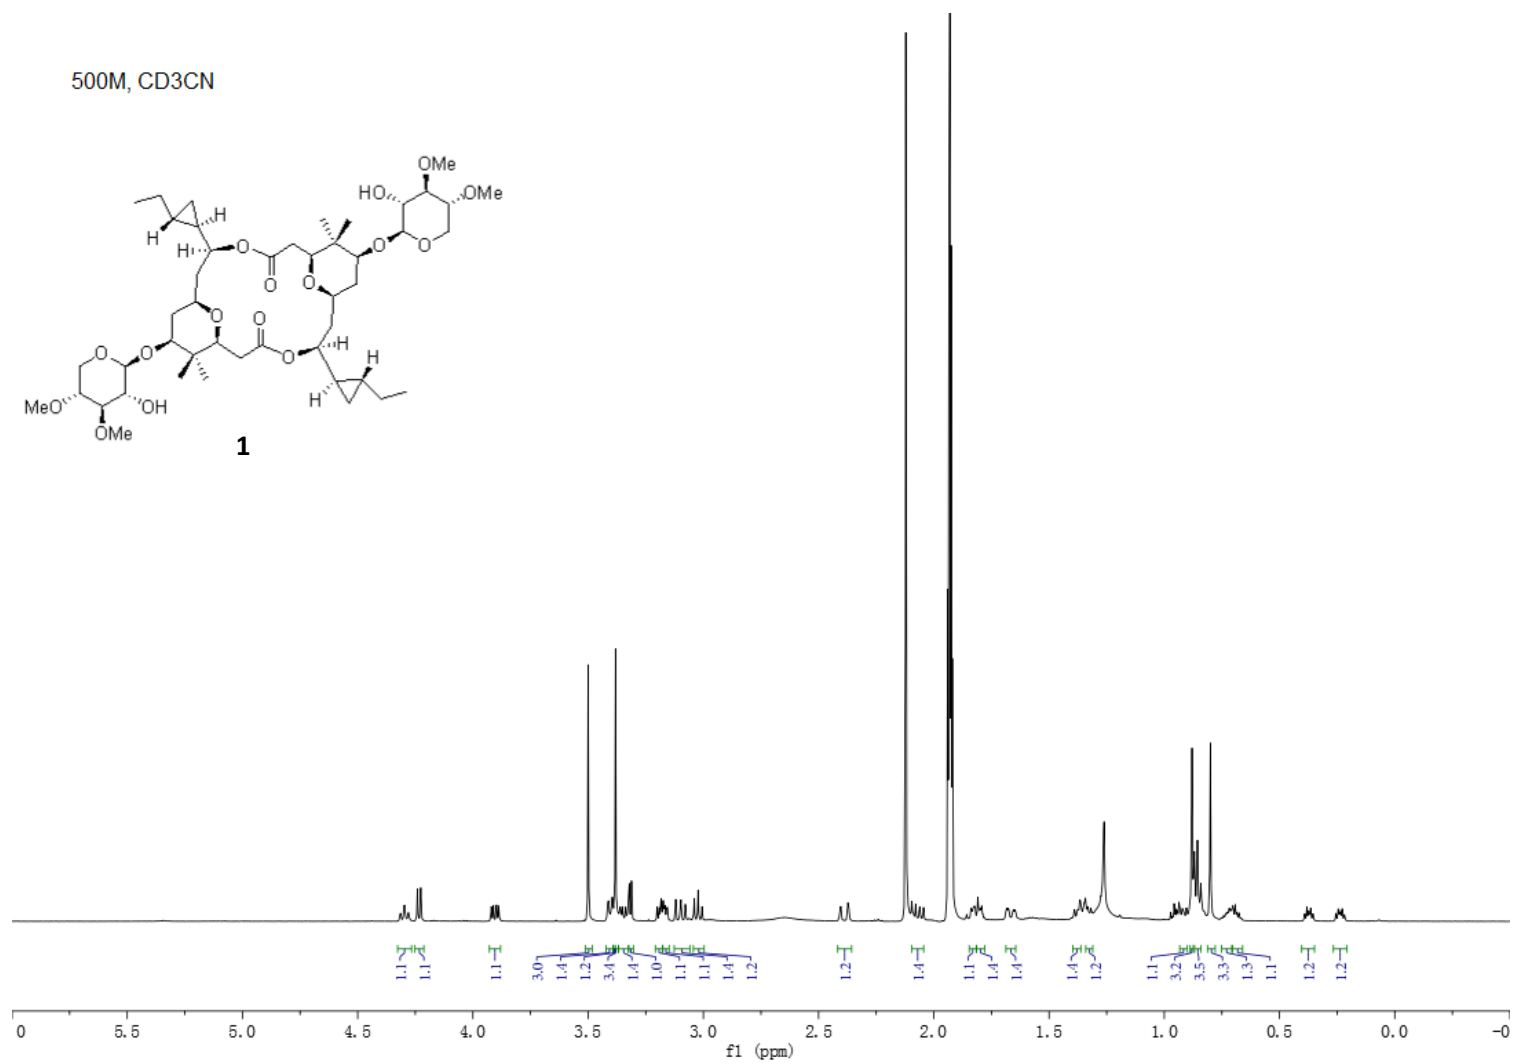

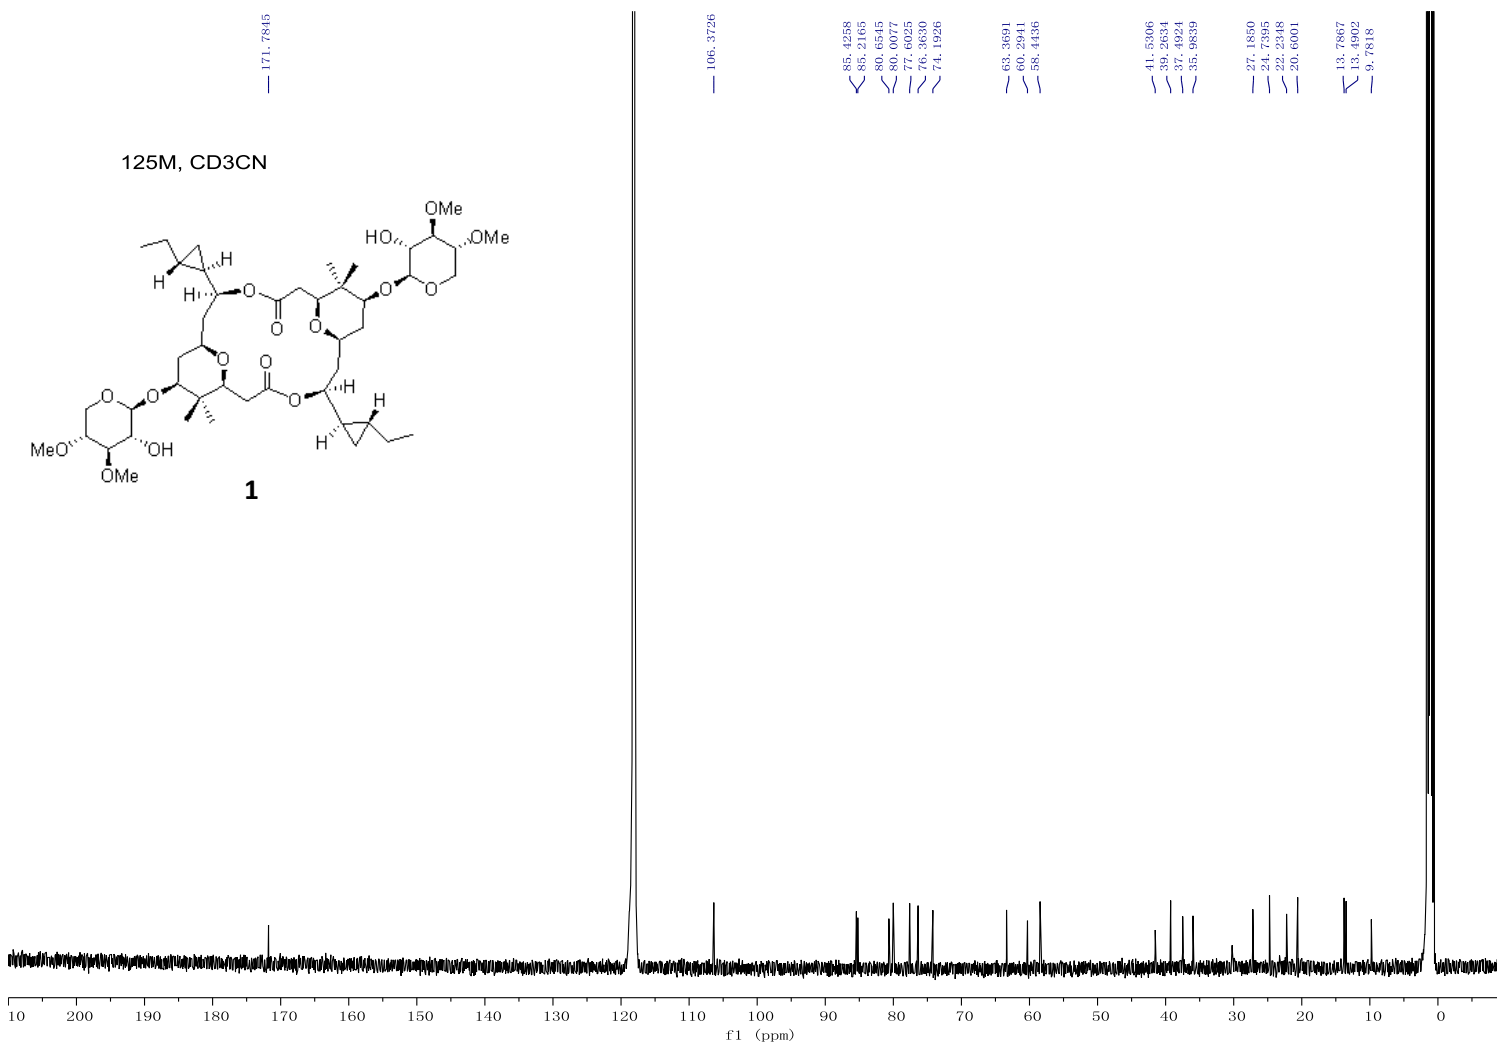

S80



400M, CDC13

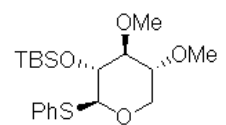

**15**

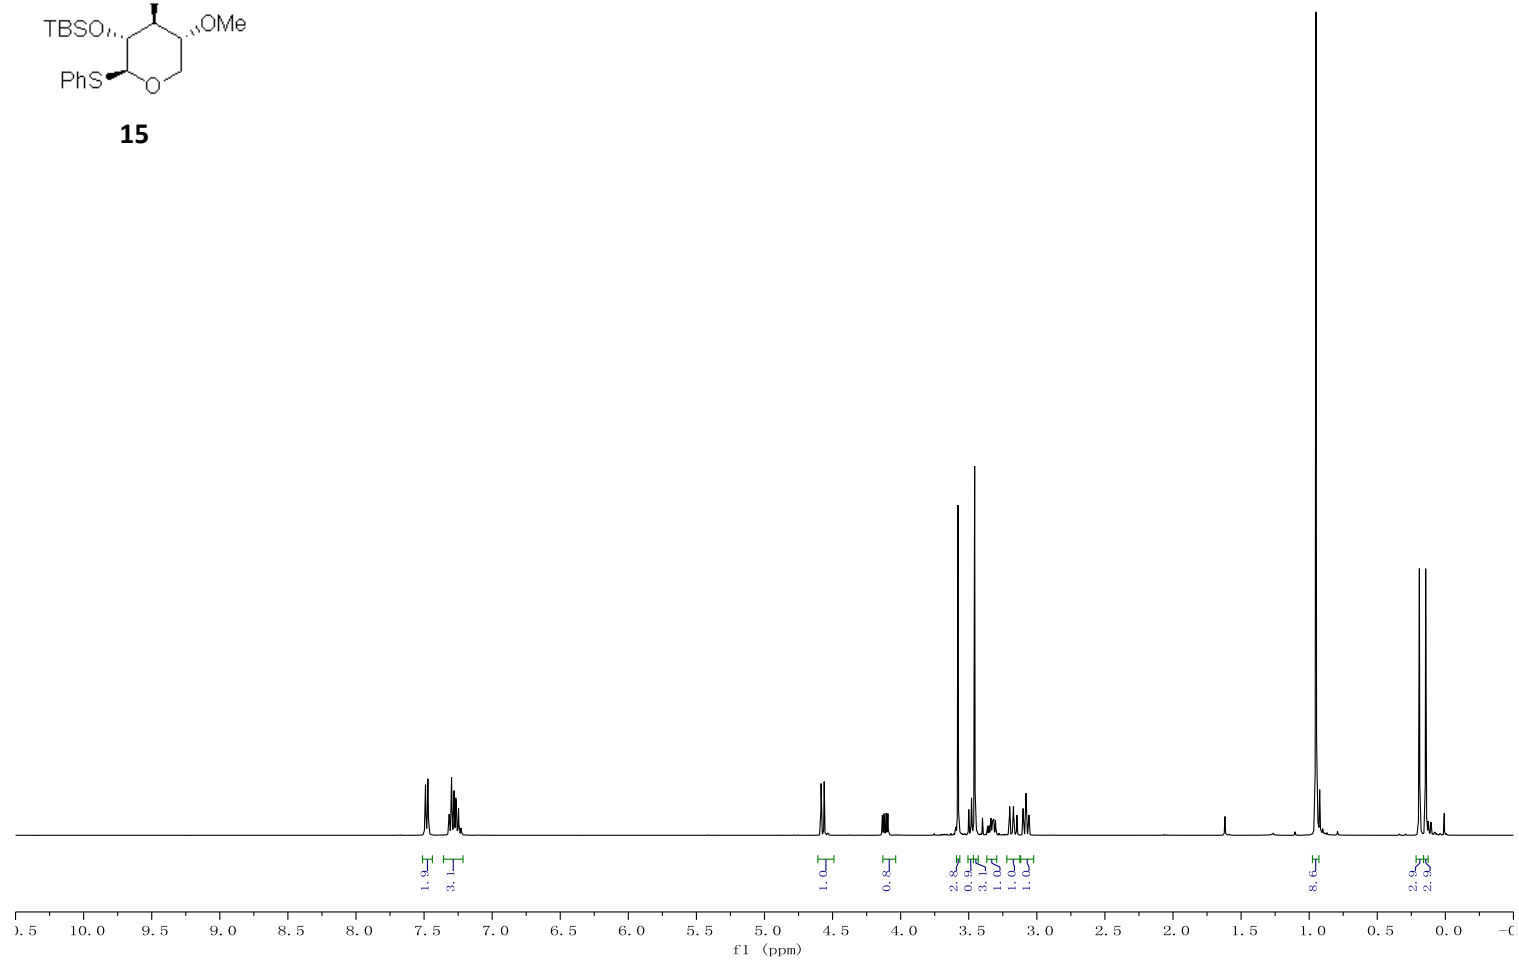

125M, CDCl<sub>3</sub>

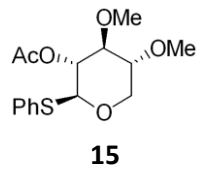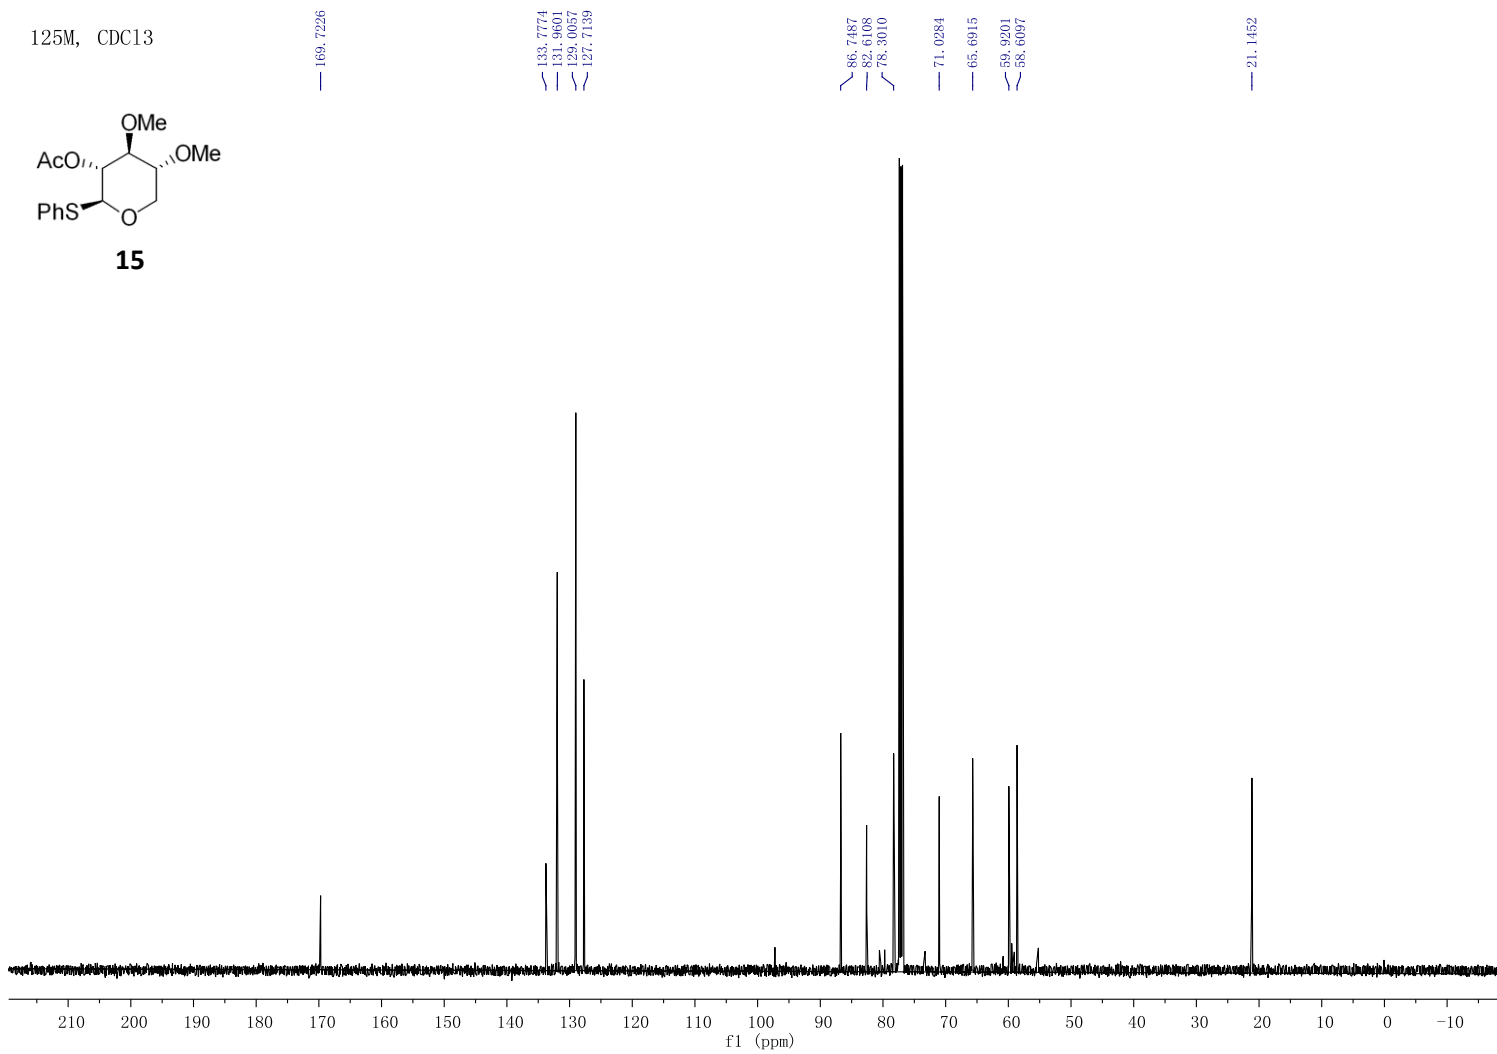

400M, CDC13

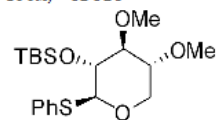

**16**

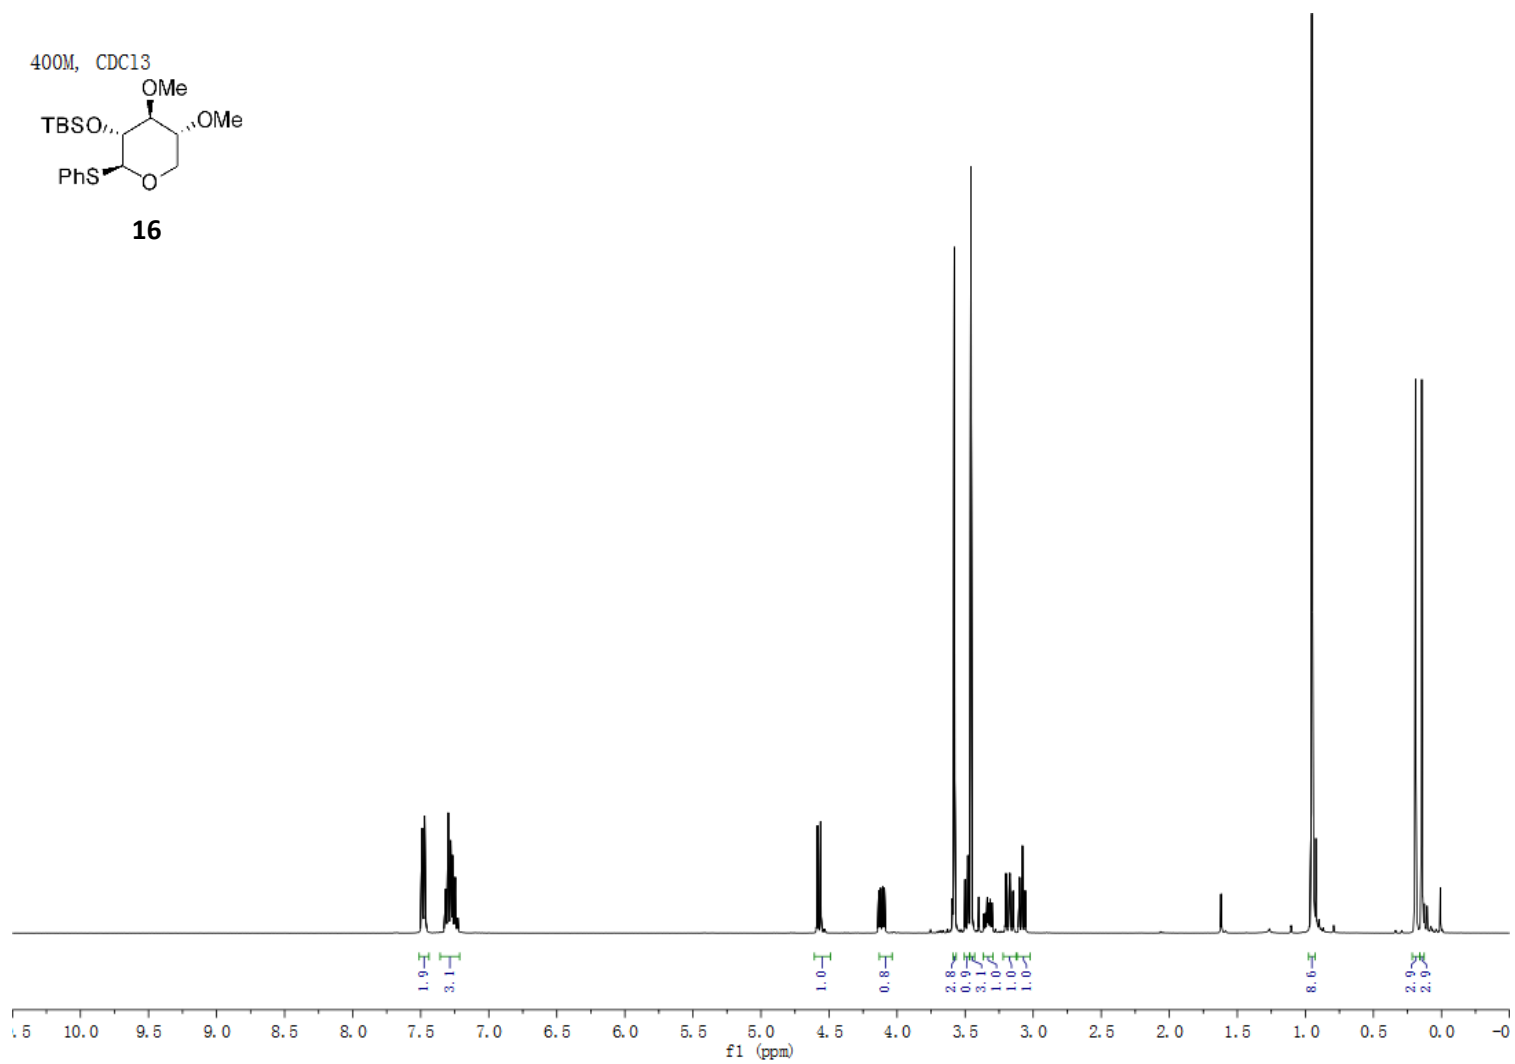



500M, CDC13

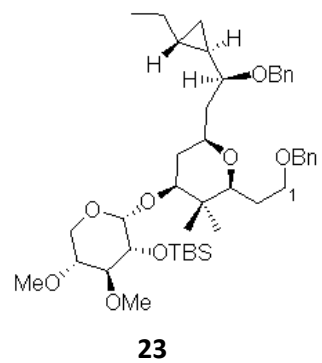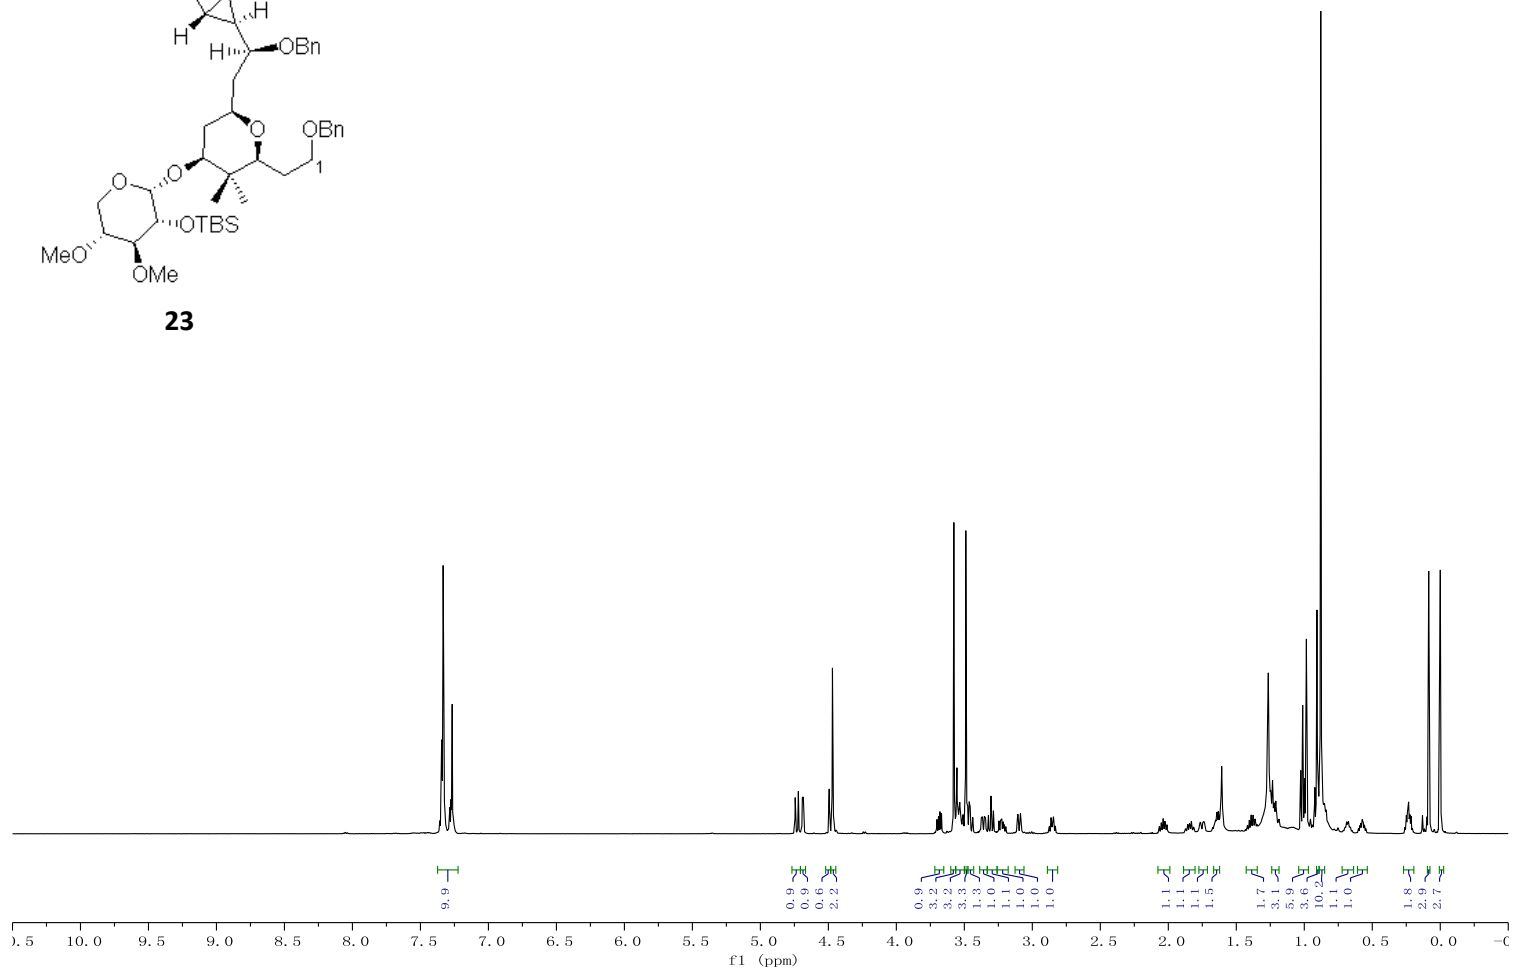

125M, CDC13

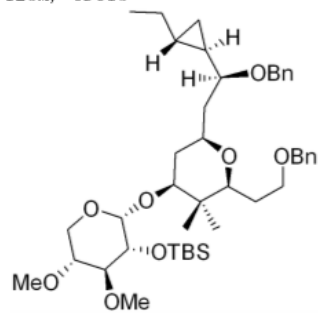

**23**

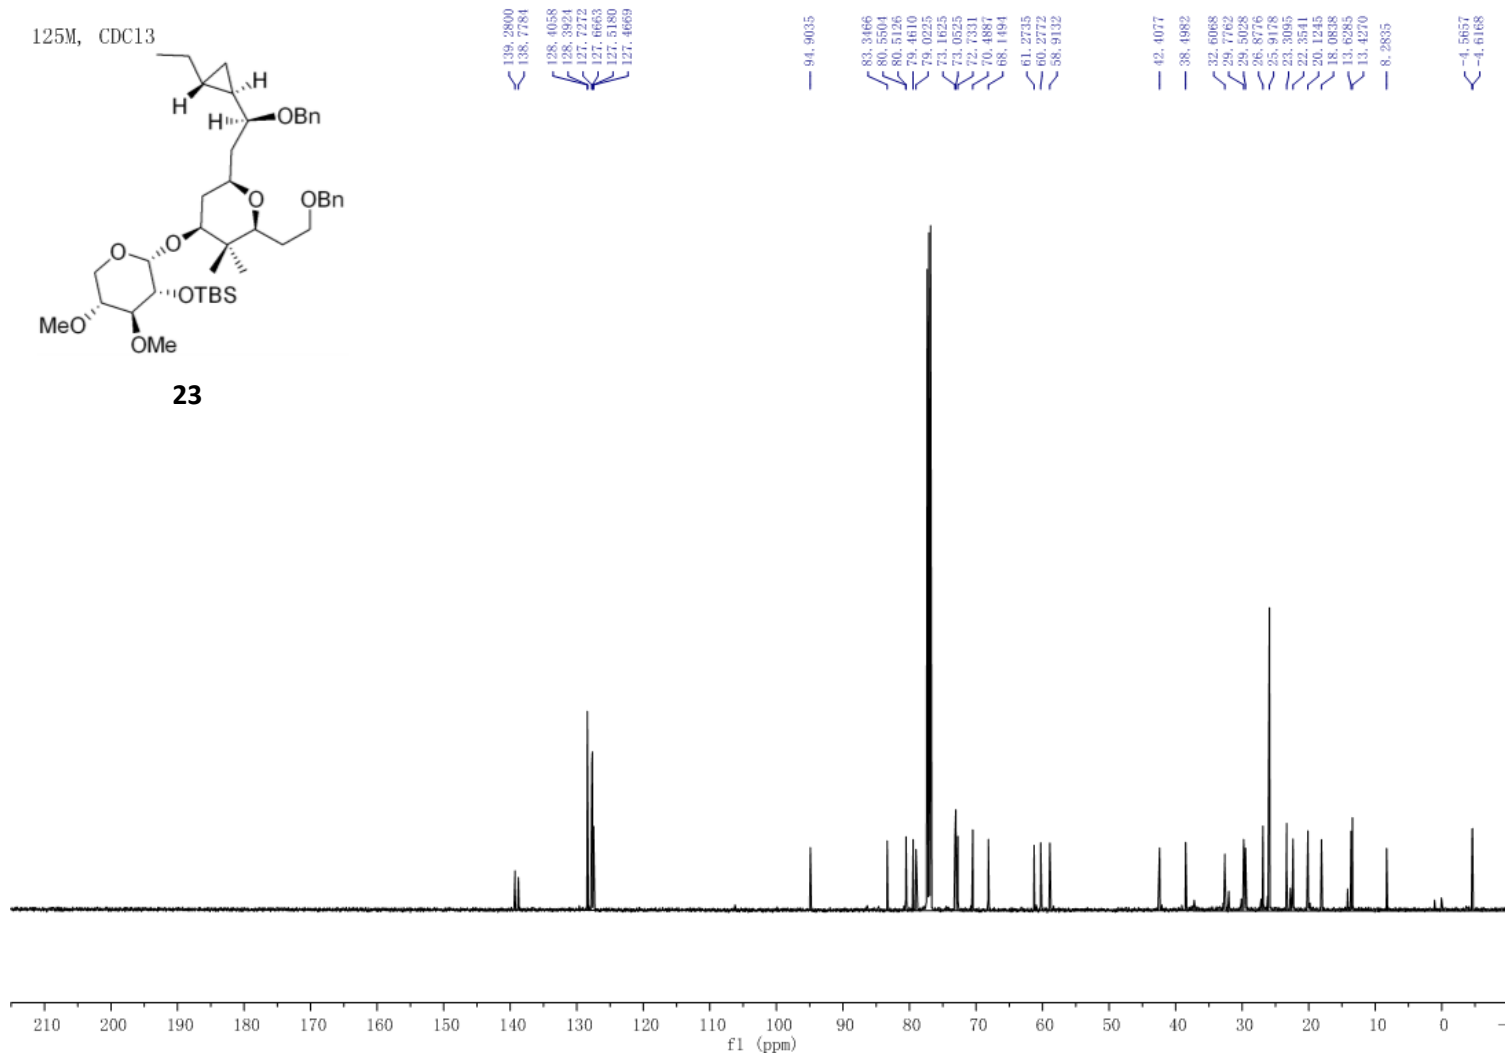

500M, CDC13

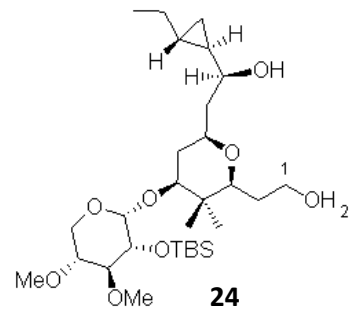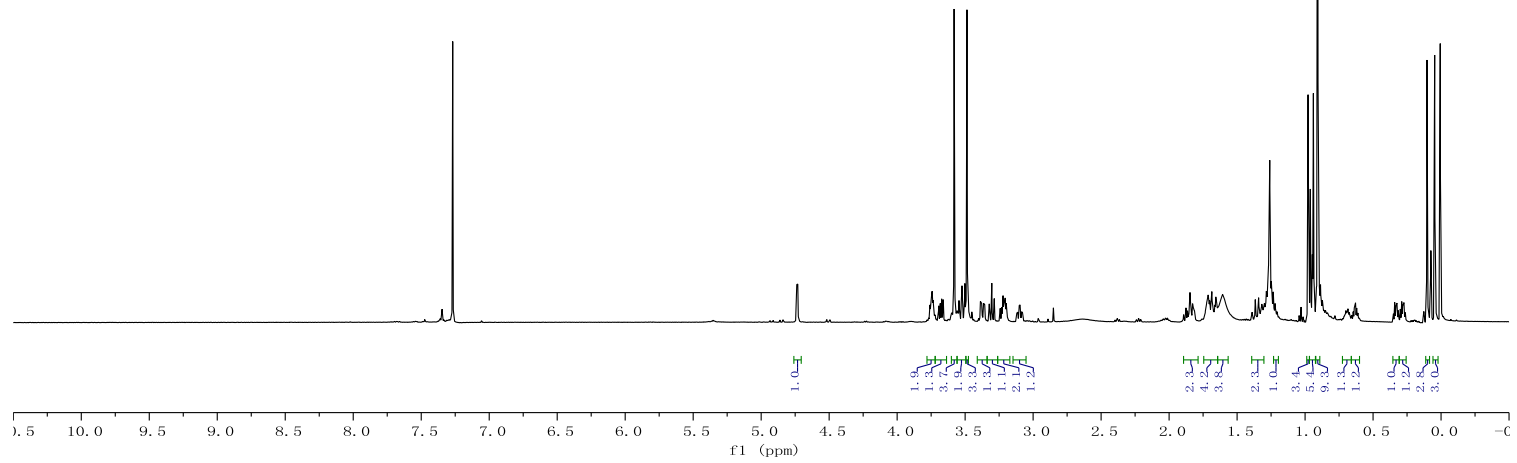

125M, CDC13

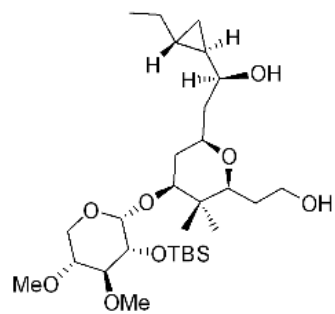

24

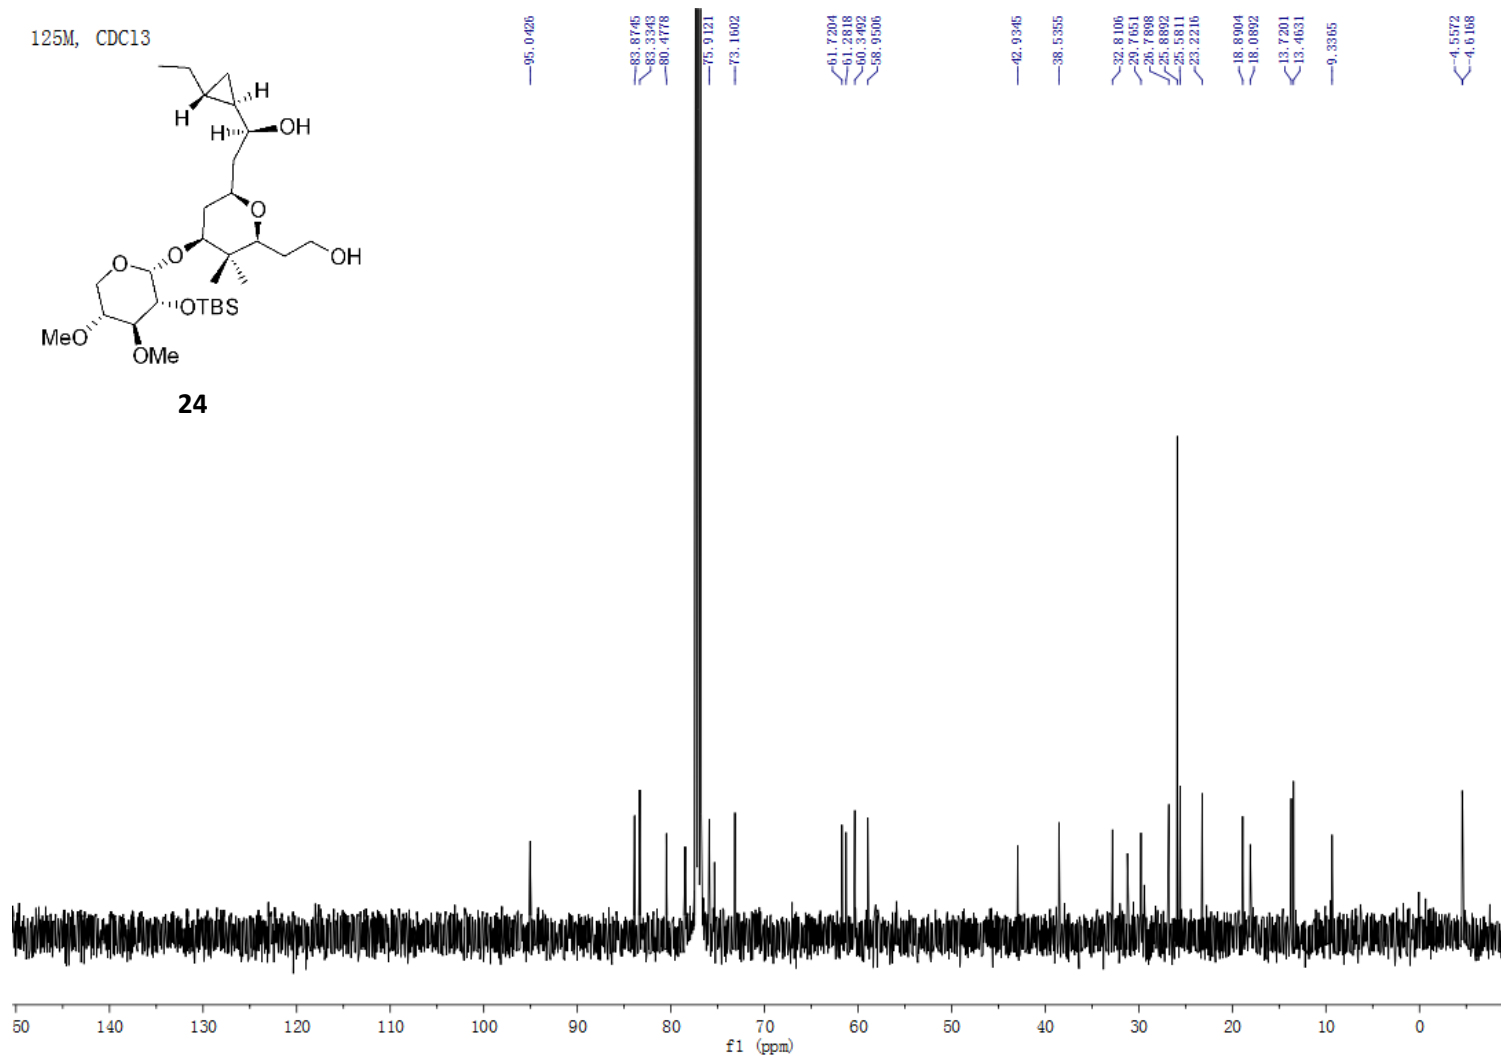



500M CD3CN

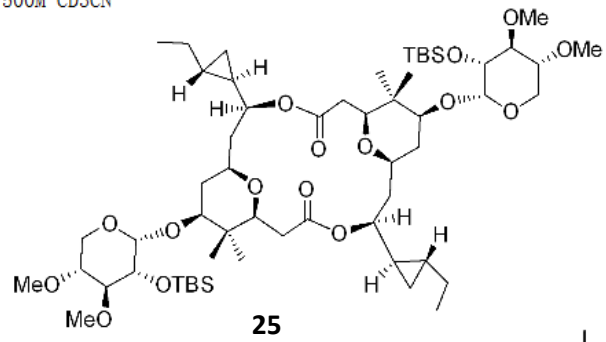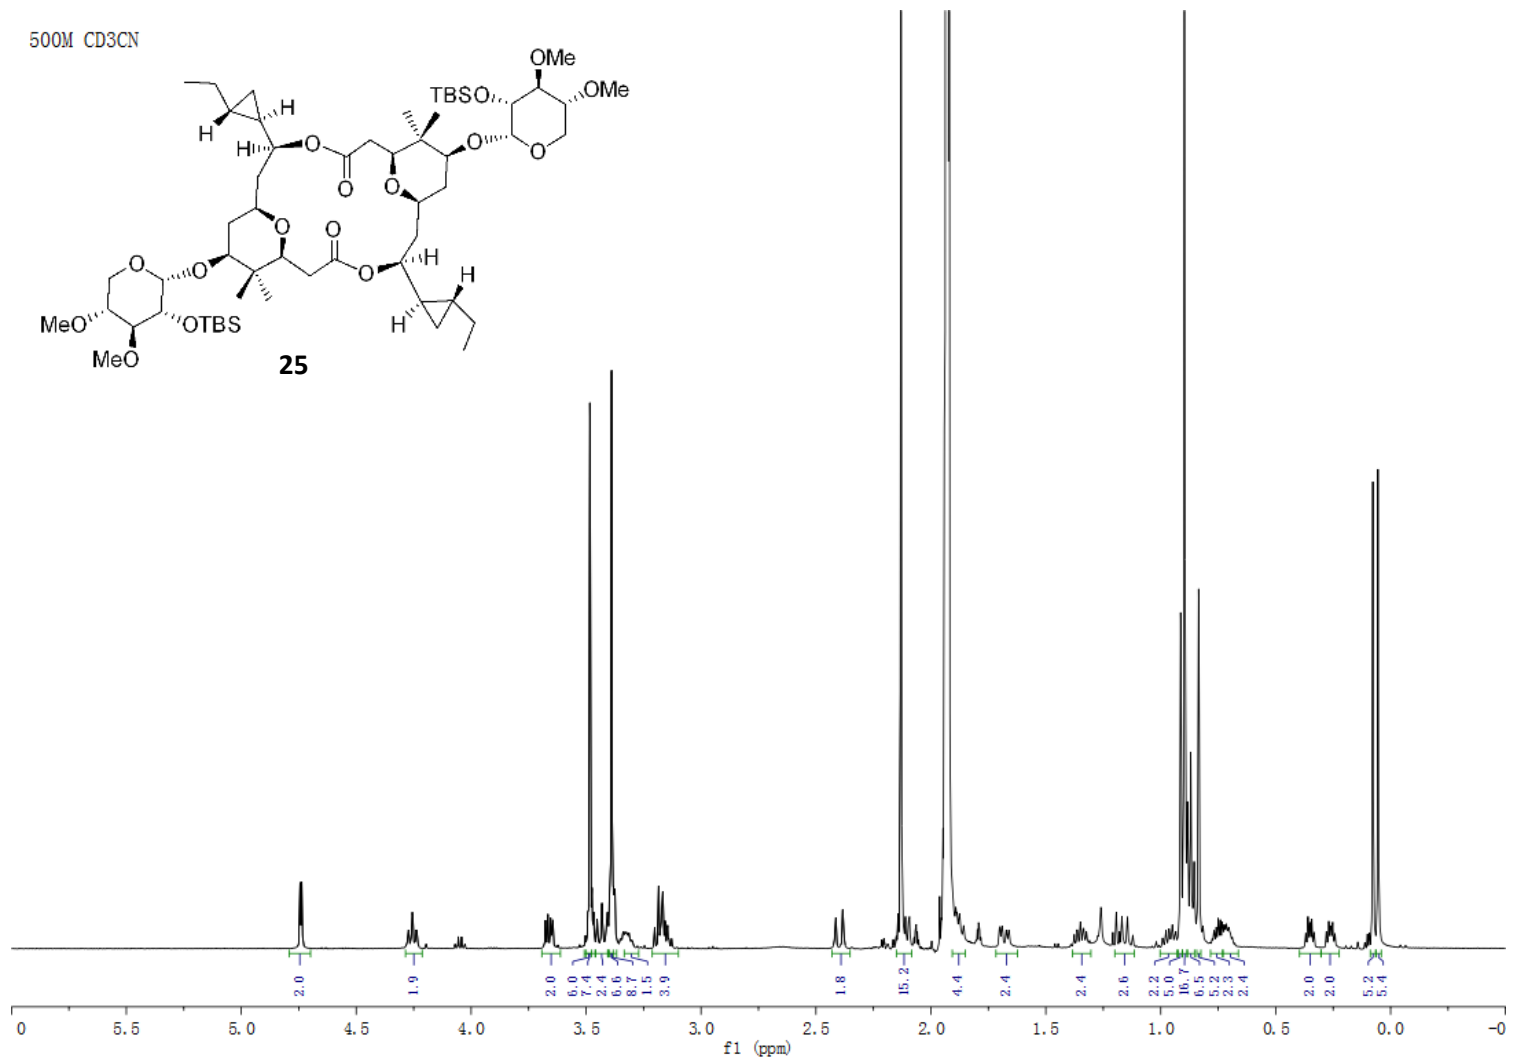

125M CD3CN

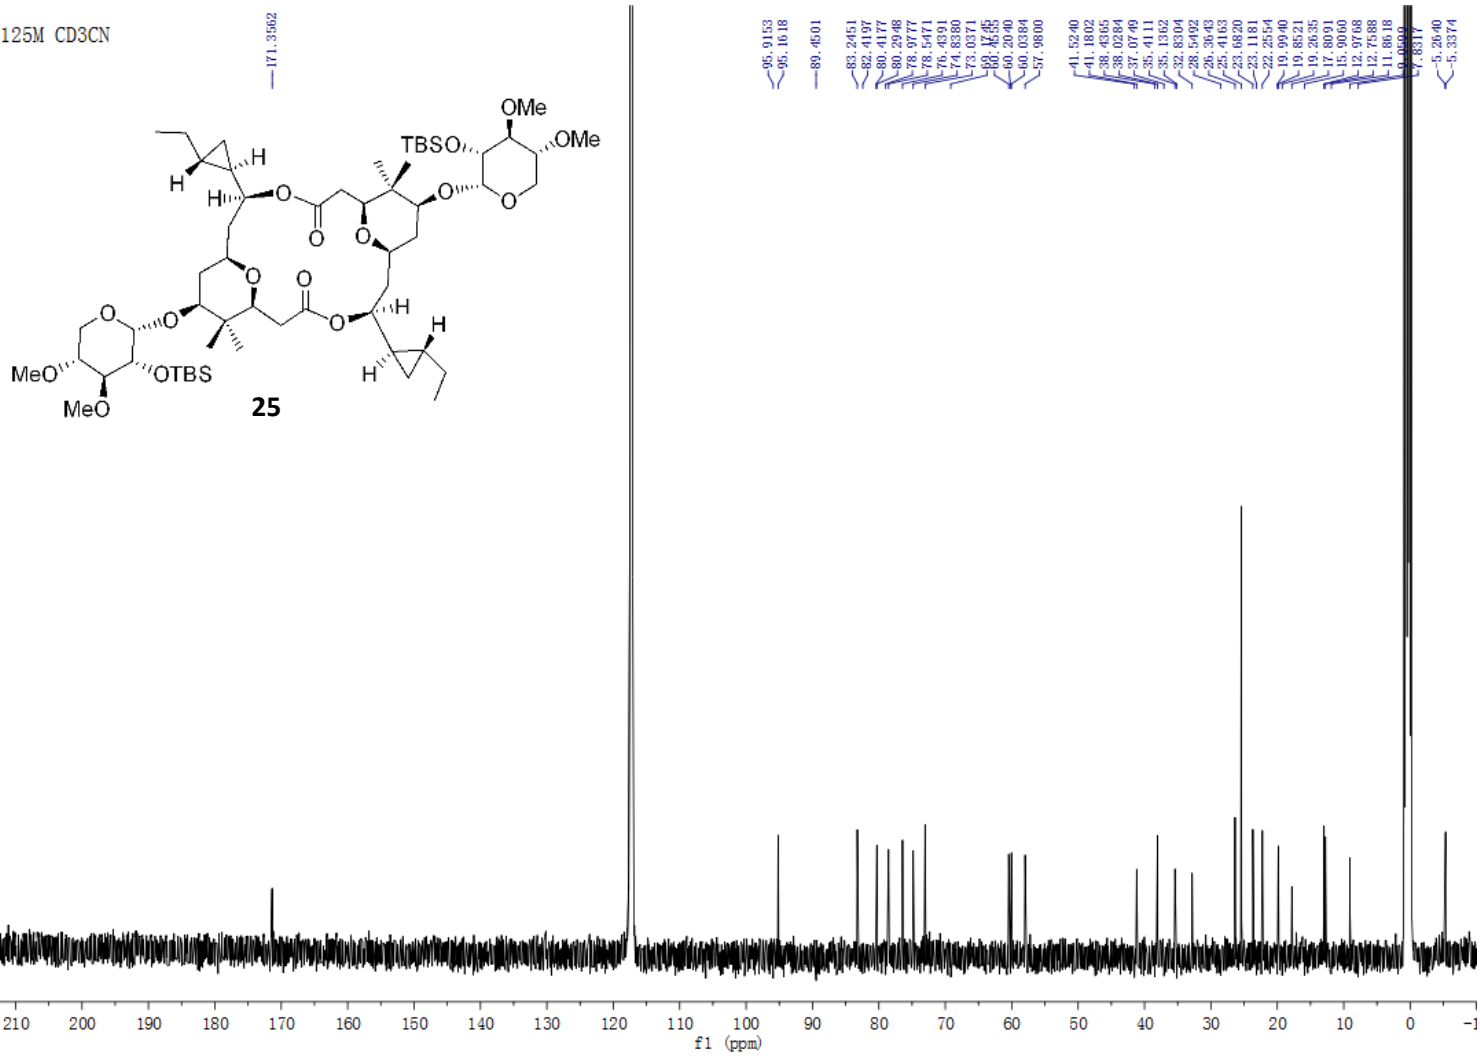

500M CD3CN

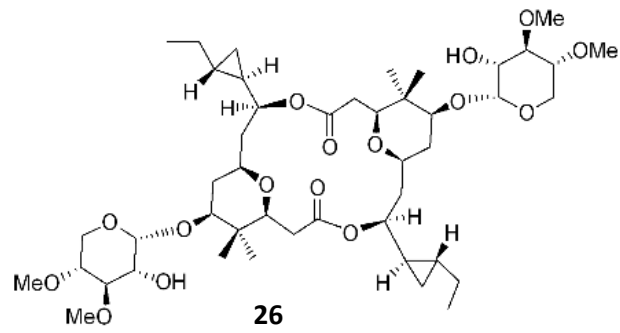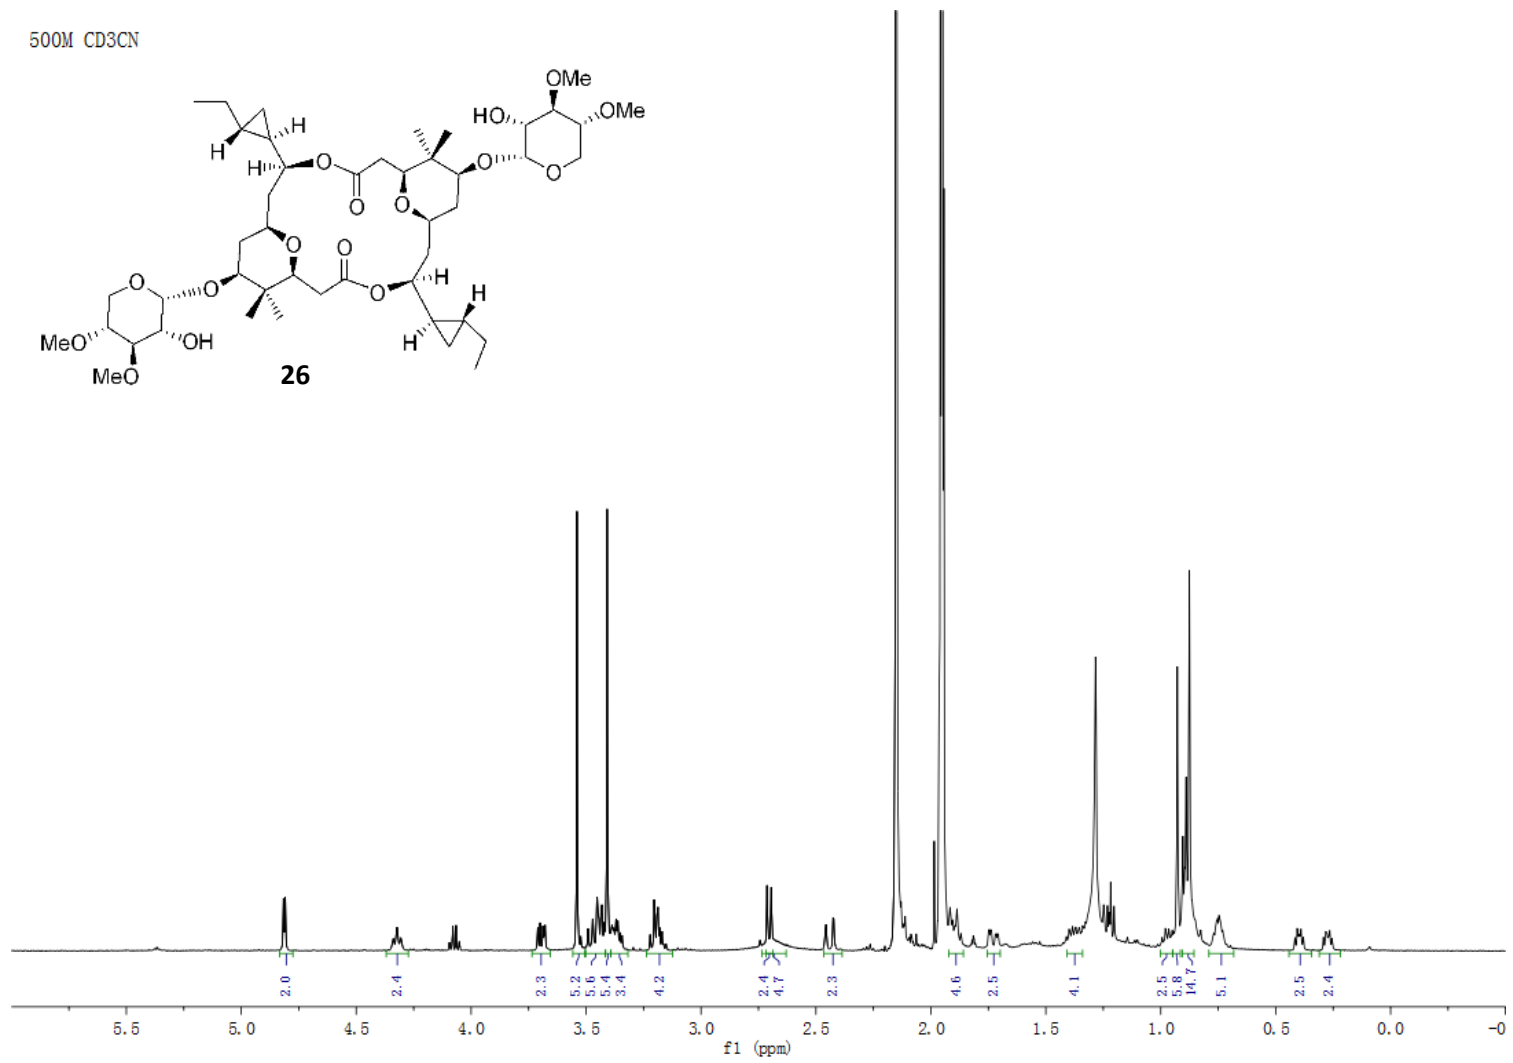

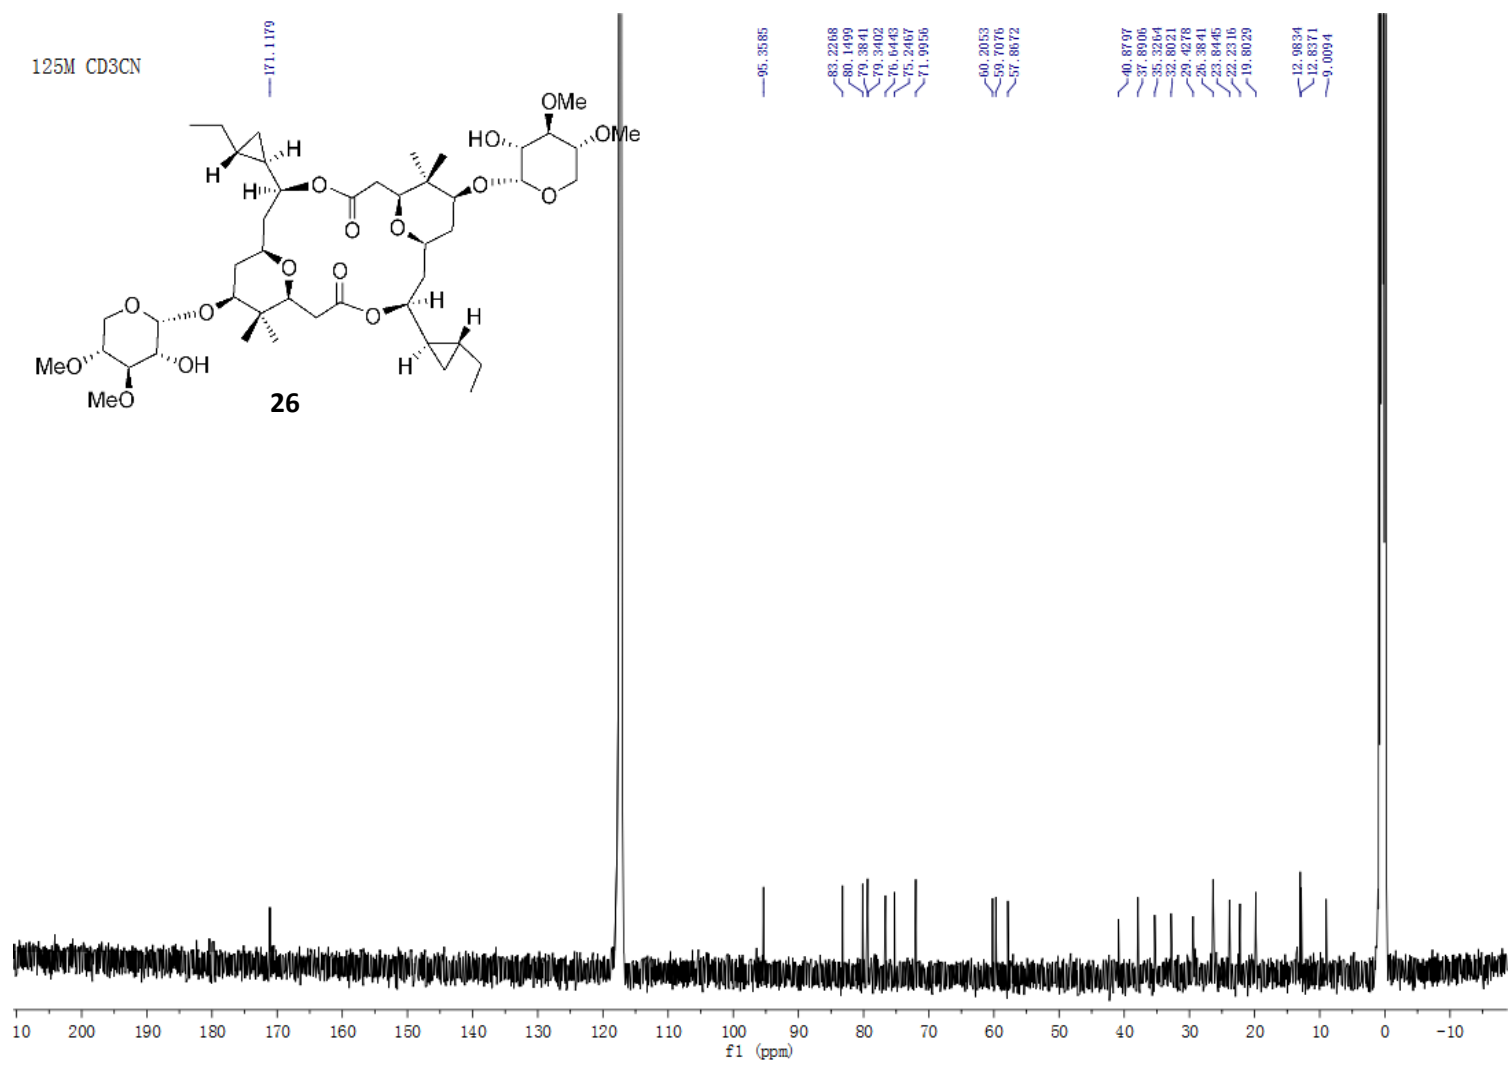

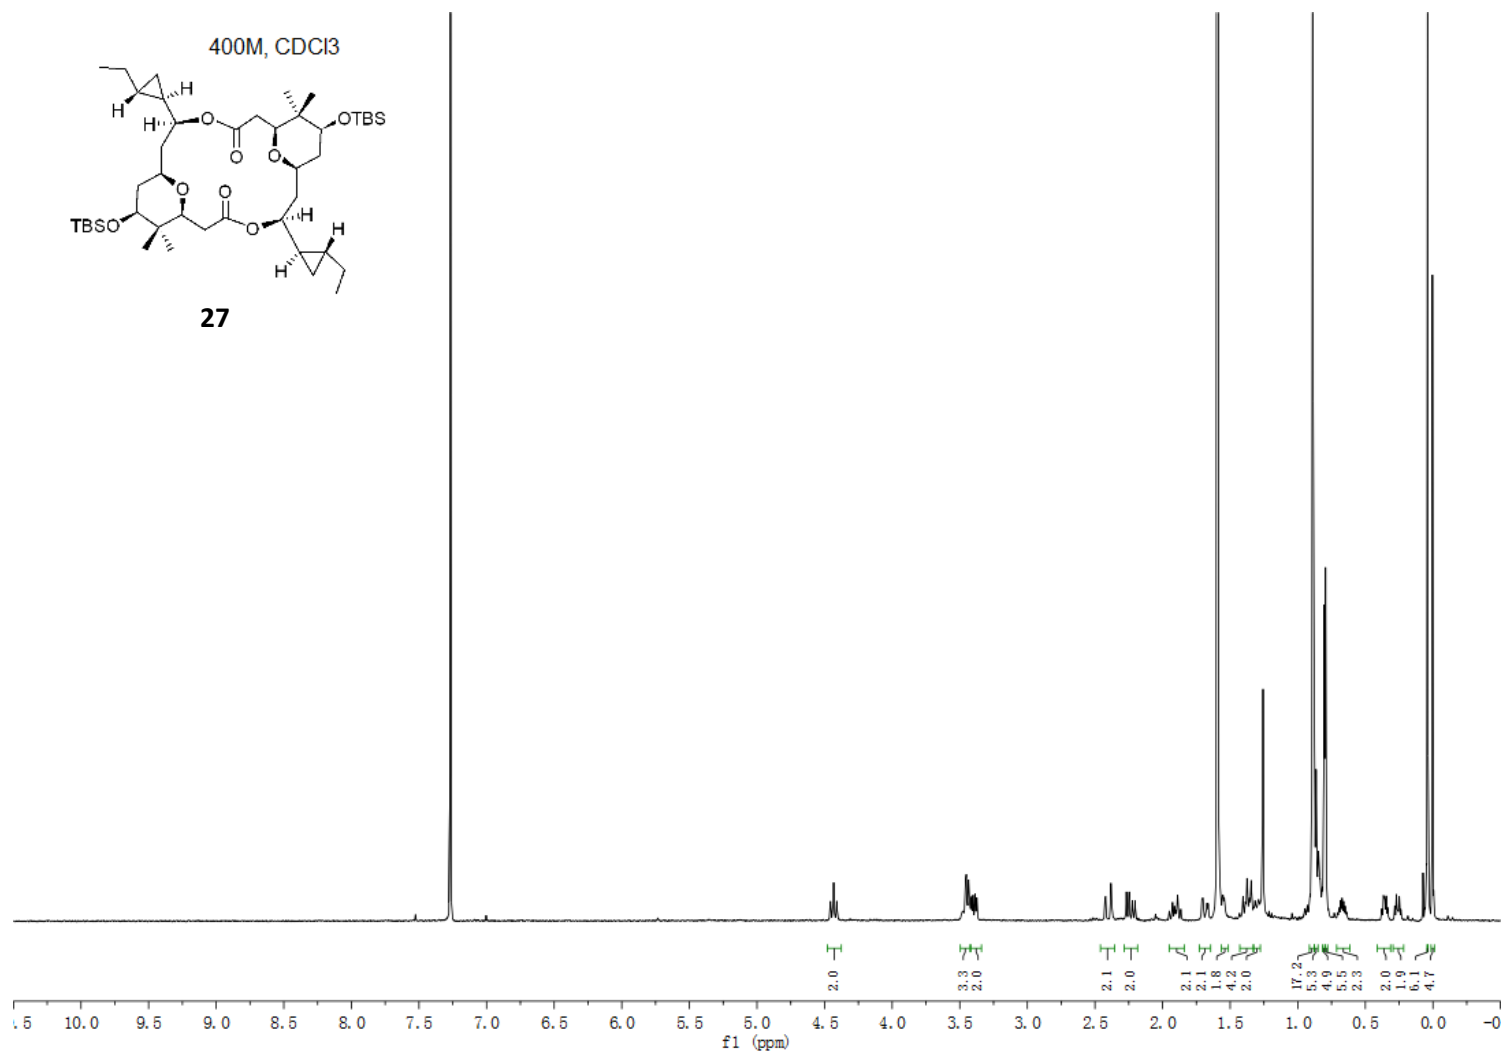

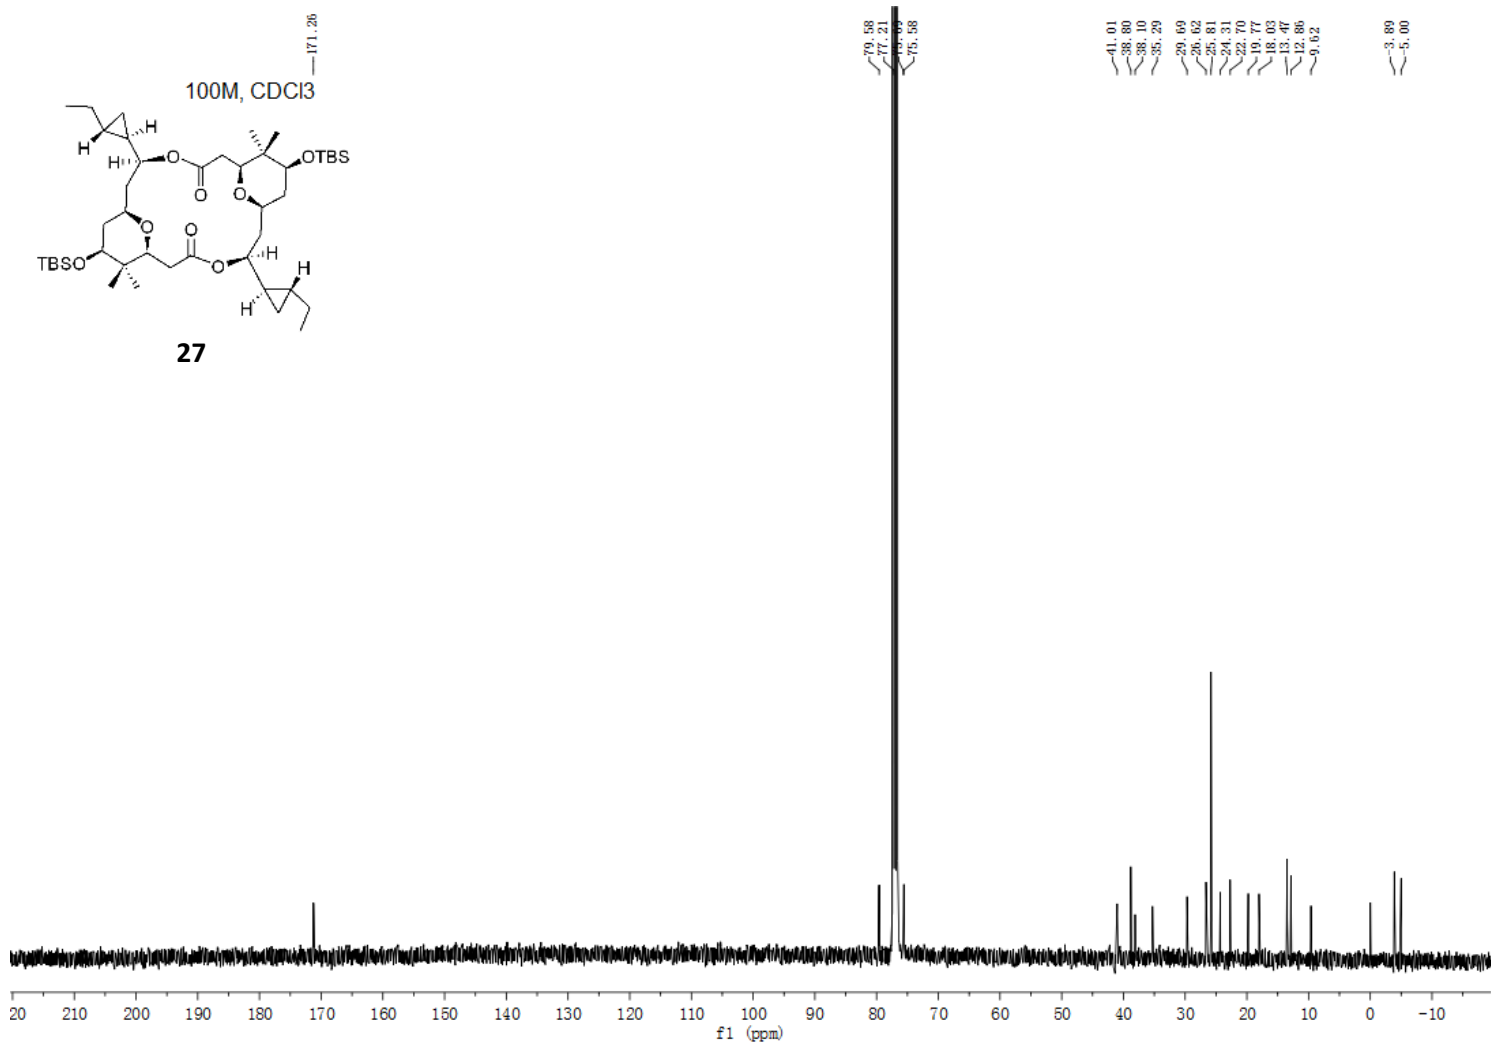

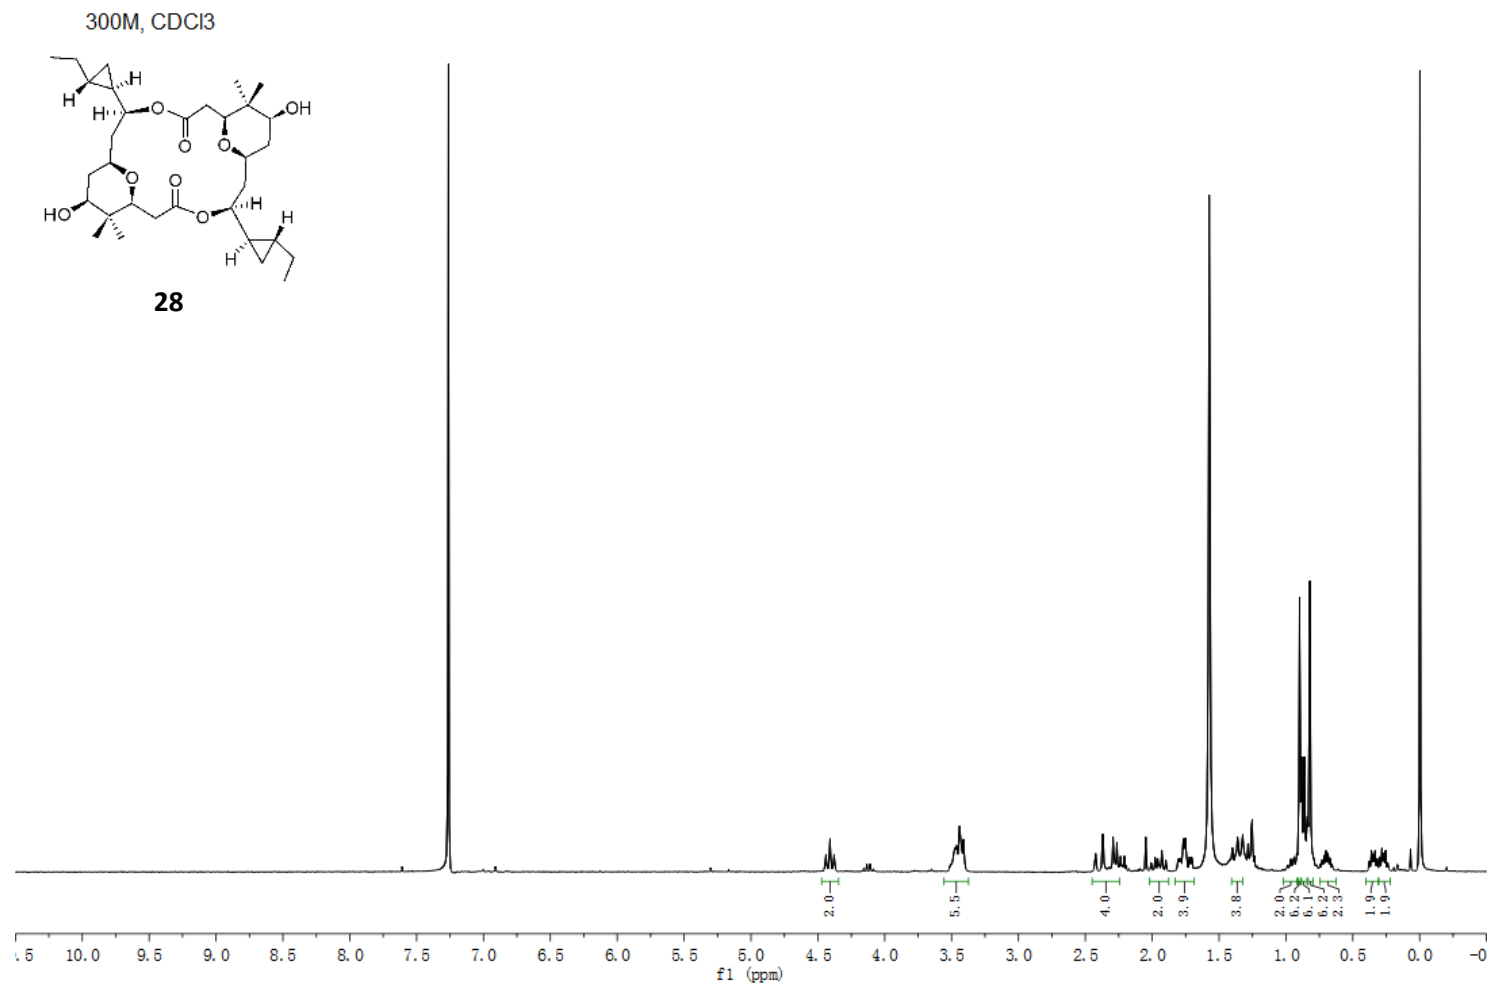

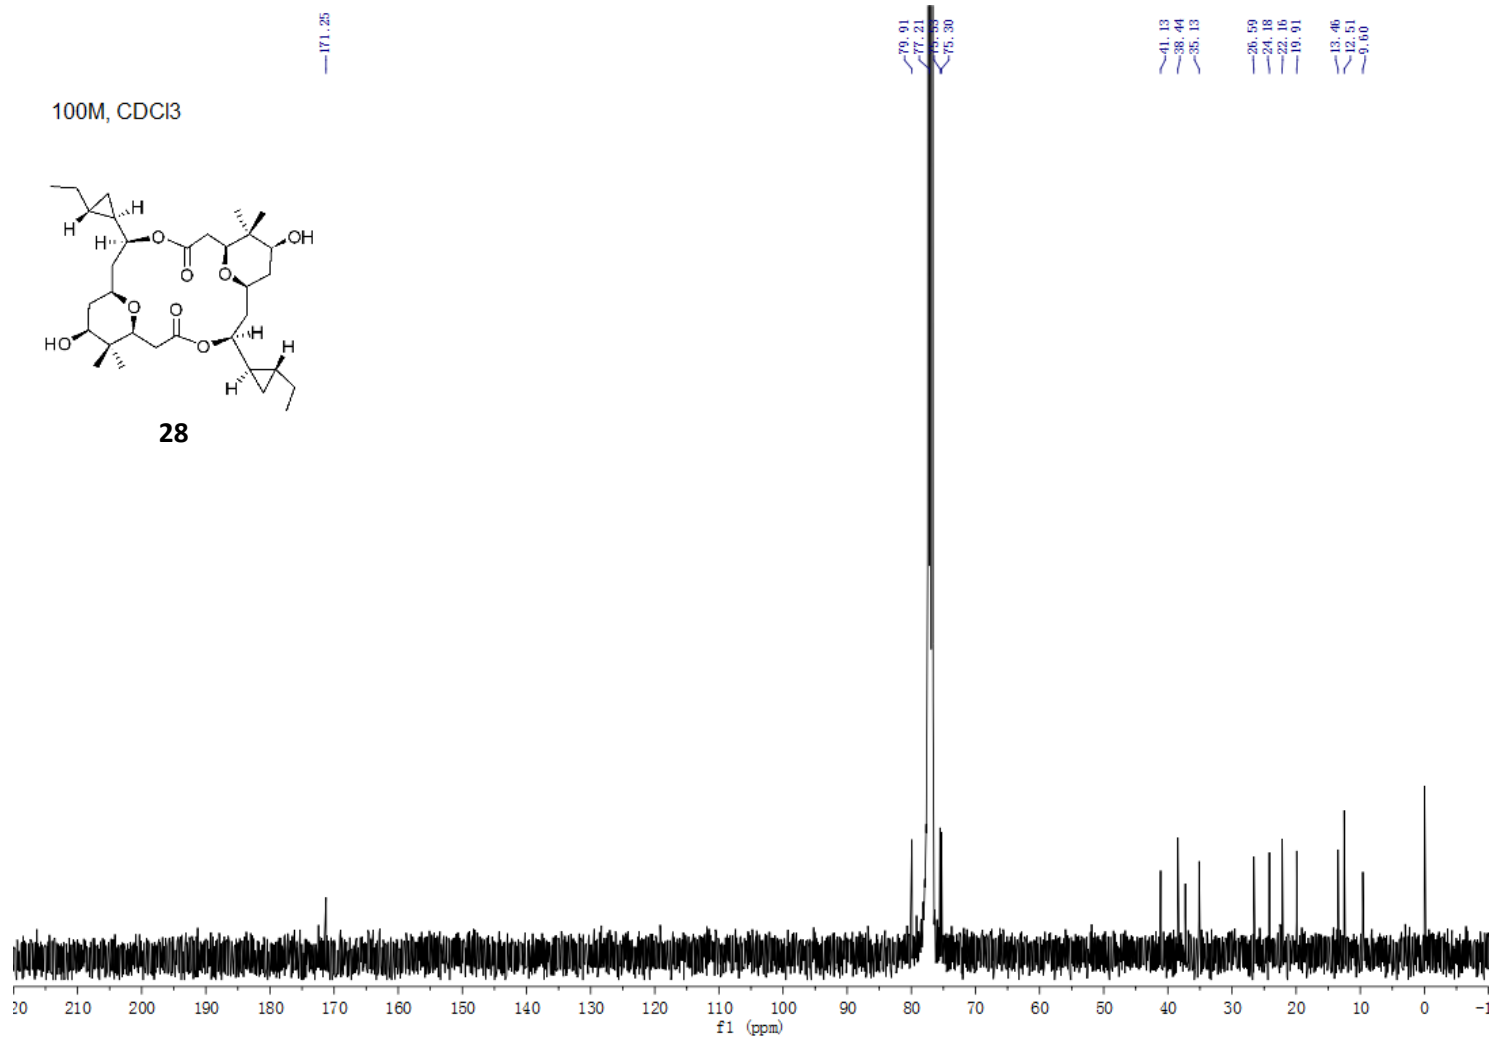



## SUPPLEMENTARY REFERENCES

- (1) APEX2 “Program for Data Collection on Area Detectors” BRUKER AXS Inc., 5465 East Cheryl Parkway, Madison, WI 53711-5373 USA.
- (2) SADABS, Sheldrick, G.M. “Program for Absorption Correction of Area Detector Frames”, BRUKER AXS Inc., 5465 East Cheryl Parkway, Madison, WI 53711-5373 USA.
- (3) Sheldrick, G. M. *Acta Crystallogr.* **2008**, *A64*, 112.
- (4) Barbour, L. J. *J. Supramol. Chem.* **2001**, *1*, 189.
